# Supplementary material for: Assessment of density functional methods with correct asymptotic behavior
Source: Royal Society of Chemistry journal article supplement (doi:10.1039/c3cp50441g), 2013-01-01
Supplement: c3cp50441g.pdf [file c3cp50441g.pdf]

# Supplementary material to: Assessment of density functional methods with correct asymptotic behavior

Chen-Wei Tsai,<sup>1</sup> Yu-Chuan Su,<sup>1</sup> Guan-De Li,<sup>1</sup> and Jeng-Da Chai<sup>1,2,\*</sup>

<sup>1</sup>*Department of Physics, National Taiwan University, Taipei 10617, Taiwan*

<sup>2</sup>*Center for Theoretical Sciences and Center for Quantum Science and Engineering,  
National Taiwan University, Taipei 10617, Taiwan*

---

\* Author to whom correspondence should be addressed. Electronic mail: [jdchai@phys.ntu.edu.tw](mailto:jdchai@phys.ntu.edu.tw).

TABLE I: Reference values (in eV) for the IP131<sup>a</sup>, EA131<sup>b</sup>, FG131<sup>b</sup> and AE113 databases. For the CCSD(T) calculations, the correlation energies in the basis-set limit are extrapolated from calculations using the aug-cc-pVTZ and aug-cc-pVQZ basis sets. The reference atomization energies for AE113 are calculated without the zero-point energy correction. All the databases contain the 18 atoms and 113 molecules collected in IP131.

| Molecule                                  | IP131        | EA131    | FG131       | AE113       |
|-------------------------------------------|--------------|----------|-------------|-------------|
|                                           | Experimental | CCSD(T)  | CCSD(T)     | CCSD(T)     |
|                                           | Vertical     | Vertical | Fundamental | Atomization |
|                                           | Ionization   | Electron | Gap         | Energy      |
|                                           | Potential    | Affinity |             |             |
| H (Hydrogen atom)                         | 13.60        | 0.75     | 12.86       |             |
| He (Helium atom)                          | 24.59        | -2.63    | 27.23       |             |
| Li (Lithium atom)                         | 5.39         | 0.62     | 4.22        |             |
| Be (Beryllium atom)                       | 9.32         | -0.36    | 9.66        |             |
| B (Boron atom)                            | 8.30         | 0.25     | 7.99        |             |
| C (Carbon atom)                           | 11.26        | 1.25     | 9.97        |             |
| N (Nitrogen atom)                         | 14.53        | -0.22    | 14.74       |             |
| O (Oxygen atom)                           | 13.62        | 1.45     | 12.14       |             |
| F (Fluorine atom)                         | 17.42        | 3.44     | 13.98       |             |
| Ne (Neon atom)                            | 21.57        | -5.31    | 26.92       |             |
| Na (Sodium atom)                          | 5.14         | 0.54     | 4.14        |             |
| Mg (Magnesium atom)                       | 7.65         | -0.23    | 7.76        |             |
| Al (Aluminum atom)                        | 5.99         | 0.45     | 5.53        |             |
| Si (Silicon atom)                         | 8.15         | 1.42     | 6.73        |             |
| P (Phosphorus atom)                       | 10.49        | 0.74     | 9.78        |             |
| S (Sulfur atom)                           | 10.36        | 2.10     | 8.23        |             |
| Cl (Chlorine atom)                        | 12.97        | 3.69     | 9.30        |             |
| Ar (Argon atom)                           | 15.76        | -2.81    | 18.65       |             |
| CH <sub>3</sub> (Methyl radical)          | 9.84         | -0.07    | 9.86        | 13.32       |
| CH <sub>4</sub> (Methane)                 | 13.60        | -0.62    | 15.06       | 18.19       |
| NH (Imidogen) ( $3\Sigma^-$ )             | 13.49        | 0.33     | 13.17       | 3.60        |
| NH <sub>2</sub> (Amino radical)           | 12.00        | 0.74     | 11.34       | 7.91        |
| NH <sub>3</sub> (Ammonia)                 | 10.82        | -0.56    | 11.54       | 12.91       |
| OH (Hydroxyl radical)                     | 13.02        | 1.84     | 11.27       | 4.65        |
| H <sub>2</sub> O (Water)                  | 12.62        | -0.56    | 13.35       | 10.11       |
| HF (Hydrogen fluoride)                    | 16.12        | -0.63    | 16.91       | 6.16        |
| SiH <sub>3</sub> (Silyl)                  | 8.74         | 0.93     | 7.95        | 9.88        |
| SiH <sub>4</sub> (Silane)                 | 12.30        | -1.11    | 14.03       | 14.07       |
| PH <sub>3</sub> (Phosphine)               | 10.59        | -1.21    | 11.83       | 10.46       |
| H <sub>2</sub> S (Hydrogen sulfide)       | 10.50        | -0.49    | 11.00       | 7.94        |
| HCl (Hydrogen chloride)                   | 12.77        | -0.52    | 13.36       | 4.65        |
| C <sub>2</sub> H <sub>2</sub> (Acetylene) | 11.49        | -1.90    | 13.43       | 17.49       |
| C <sub>2</sub> H <sub>4</sub> (Ethylene)  | 10.68        | -1.87    | 12.57       | 24.38       |

|                                                     |       |                    |                    |       |
|-----------------------------------------------------|-------|--------------------|--------------------|-------|
| C <sub>2</sub> H <sub>6</sub> (Ethane)              | 11.99 | -0.63              | 13.41              | 30.84 |
| HCN (Hydrogen cyanide)                              | 13.61 | -0.48              | 14.31              | 13.51 |
| CO (Carbon monoxide)                                | 14.01 | -1.51              | 15.57              | 11.22 |
| HCO (Formyl radical)                                | 9.31  | 0.02               | 9.56               | 12.01 |
| H <sub>2</sub> CO (Formaldehyde)                    | 10.89 | -0.55              | 11.56              | 16.20 |
| CH <sub>3</sub> OH (Methyl alcohol)                 | 10.96 | -0.55              | 11.67              | 22.22 |
| N <sub>2</sub> (Nitrogen diatomic)                  | 15.58 | -2.24              | 17.88              | 9.85  |
| N <sub>2</sub> H <sub>4</sub> (Hydrazine)           | 8.98  | -0.45              | 10.30              | 18.82 |
| NO (Nitric oxide)                                   | 9.26  | -0.42              | 10.11              | 6.57  |
| O <sub>2</sub> (Oxygen diatomic) ( $3\Sigma_g$ )    | 12.30 | -0.08              | 12.52              | 5.20  |
| H <sub>2</sub> O <sub>2</sub> (Hydrogen peroxide)   | 11.70 | -0.92              | 12.65              | 11.62 |
| F <sub>2</sub> (Fluorine diatomic)                  | 15.70 | 0.42               | 15.53              | 1.67  |
| CO <sub>2</sub> (Carbon dioxide)                    | 13.78 | -0.65              | 14.58              | 16.85 |
| P <sub>2</sub> (Phosphorus diatomic)                | 10.62 | 0.48               | 10.19              | 4.99  |
| S <sub>2</sub> (Sulfur diatomic) ( $3\Sigma_g$ )    | 9.55  | 1.53               | 7.96               | 4.41  |
| Cl <sub>2</sub> (Chlorine diatomic)                 | 11.49 | 0.75               | 10.93              | 2.53  |
| NaCl (Sodium Chloride)                              | 9.80  | 0.65               | 8.64               | 4.32  |
| SiO (Silicon monoxide)                              | 11.61 | 0.03               | 11.60              | 8.25  |
| CS (Carbon monosulfide)                             | 11.34 | -0.09              | 11.58              | 7.37  |
| ClO (Monochlorine monoxide)                         | 11.01 | 2.19               | 8.86               | 2.74  |
| ClF (Chlorine monofluoride)                         | 12.77 | 0.44               | 12.43              | 2.68  |
| Si <sub>2</sub> H <sub>6</sub> (Disilane)           | 10.53 | -0.69              | 11.33              | 23.19 |
| CH <sub>3</sub> Cl (Methyl chloride)                | 11.29 | -0.51              | 12.01              | 17.08 |
| CH <sub>3</sub> SH (Methanethiol)                   | 9.44  | -0.50              | 10.01              | 20.50 |
| SO <sub>2</sub> (Sulfur dioxide)                    | 12.50 | 0.81               | 11.74              | 10.97 |
| BF <sub>3</sub> (Borane, trifluoro-)                | 15.96 | -1.04              | 17.22              | 20.40 |
| BCl <sub>3</sub> (Borane, trichloro-)               | 11.64 | -0.17              | 12.07              | 14.02 |
| AlCl <sub>3</sub> (Aluminum trichloride)            | 12.01 | 0.06               | 12.14              | 13.57 |
| CF <sub>4</sub> (Carbon tetrafluoride)              | 16.20 | -1.33              | 17.85              | 20.80 |
| CCl <sub>4</sub> (Carbon tetrachloride)             | 11.69 | -0.46              | 11.97              | 13.59 |
| OCS (Carbonyl sulfide)                              | 11.19 | -0.74              | 12.13              | 14.45 |
| CS <sub>2</sub> (Carbon disulfide)                  | 10.09 | 0.01               | 10.19              | 12.00 |
| CF <sub>2</sub> O (Carbonic difluoride)             | 13.60 | -2.37              | 16.08              | 18.22 |
| SiF <sub>4</sub> (Silicon tetrafluoride)            | 16.40 | -0.81              | 16.95              | 24.92 |
| N <sub>2</sub> O (Nitrous oxide)                    | 12.89 | -2.01              | 15.01              | 11.66 |
| NF <sub>3</sub> (Nitrogen trifluoride)              | 13.60 | -2.06              | 15.76              | 8.94  |
| PF <sub>3</sub> (Phosphorus trifluoride)            | 12.20 | -1.23              | 13.00              | 15.64 |
| O <sub>3</sub> (Ozone)                              | 12.73 | 1.93               | 11.06              | 6.26  |
| F <sub>2</sub> O (Difluorine monoxide)              | 13.26 | -0.31              | 13.82              | 4.04  |
| ClF <sub>3</sub> (Chlorine trifluoride)             | 13.05 | 1.20               | 11.79              | 5.43  |
| C <sub>2</sub> F <sub>4</sub> (Tetrafluoroethylene) | 10.69 | -1.65              | 12.45              | 25.54 |
| CF <sub>3</sub> CN (Acetonitrile, trifluoro-)       | 14.30 | -0.96 <sup>b</sup> | 15.40 <sup>b</sup> | 27.77 |
| CH <sub>3</sub> CCH (Propyne)                       | 10.37 | -1.13              | 11.70              | 30.44 |

|                                                                        |       |                    |                    |       |
|------------------------------------------------------------------------|-------|--------------------|--------------------|-------|
| CH <sub>2</sub> CCH <sub>2</sub> (Allene)                              | 10.20 | -0.56              | 10.83              | 30.40 |
| C <sub>3</sub> H <sub>4</sub> (Cyclopropene)                           | 9.86  | -1.82              | 11.87              | 29.45 |
| C <sub>3</sub> H <sub>6</sub> (Cyclopropane)                           | 10.54 | -0.65              | 11.64              | 36.91 |
| C <sub>3</sub> H <sub>8</sub> (Propane)                                | 11.51 | -0.60 <sup>b</sup> | 12.72 <sup>b</sup> | 43.58 |
| CH <sub>3</sub> CCCH <sub>3</sub> (2-Butyne)                           | 9.79  | -0.68 <sup>b</sup> | 10.46 <sup>b</sup> | 43.32 |
| C <sub>4</sub> H <sub>6</sub> (Cyclobutene)                            | 9.43  | -1.41 <sup>b</sup> | 11.14 <sup>b</sup> | 43.28 |
| CH <sub>3</sub> CH(CH <sub>3</sub> )CH <sub>3</sub> (Isobutane)        | 11.13 | -0.56 <sup>b</sup> | 12.28 <sup>b</sup> | 56.37 |
| C <sub>6</sub> H <sub>6</sub> (Benzene)                                | 9.25  | -0.71 <sup>b</sup> | 10.16 <sup>b</sup> | 59.14 |
| CH <sub>2</sub> F <sub>2</sub> (Methane, difluoro-)                    | 13.27 | -0.58              | 14.15              | 18.99 |
| CHF <sub>3</sub> (Methane, trifluoro-)                                 | 15.50 | -0.60              | 15.44              | 19.92 |
| CH <sub>2</sub> Cl <sub>2</sub> (Methylene chloride)                   | 11.40 | -0.49              | 12.18              | 16.05 |
| CHCl <sub>3</sub> (Chloroform)                                         | 11.50 | -0.83              | 12.38              | 14.87 |
| CH <sub>3</sub> NO <sub>2</sub> (Methane, nitro-)                      | 11.29 | -0.37              | 11.95              | 26.01 |
| CH <sub>3</sub> SiH <sub>3</sub> (Methyl silane)                       | 11.60 | -0.53              | 12.35              | 27.23 |
| HCOOH (Formic acid)                                                    | 11.50 | -0.57              | 11.98              | 21.49 |
| CH <sub>3</sub> CONH <sub>2</sub> (Acetamide)                          | 10.00 | -0.31              | 10.05              | 37.48 |
| C <sub>2</sub> H <sub>5</sub> N (Aziridine)                            | 9.85  | -0.56 <sup>b</sup> | 10.44 <sup>b</sup> | 31.11 |
| C <sub>2</sub> N <sub>2</sub> (Cyanogen)                               | 13.51 | -0.19              | 13.90              | 21.60 |
| CH <sub>3</sub> NHCH <sub>3</sub> (Dimethylamine)                      | 8.95  | -0.56 <sup>b</sup> | 9.65 <sup>b</sup>  | 37.66 |
| CH <sub>2</sub> CO (Ketene)                                            | 9.64  | -0.51              | 10.32              | 23.03 |
| C <sub>2</sub> H <sub>4</sub> O (Ethylene oxide)                       | 10.57 | -0.86              | 11.68              | 28.18 |
| C <sub>2</sub> H <sub>2</sub> O <sub>2</sub> (Ethanedial)              | 10.60 | 0.69               | 10.04              | 27.39 |
| CH <sub>3</sub> CH <sub>2</sub> OH (Ethanol)                           | 10.64 | -0.53              | 11.38              | 35.06 |
| CH <sub>3</sub> OCH <sub>3</sub> (Dimethyl ether)                      | 10.10 | -0.58              | 10.79              | 34.56 |
| C <sub>2</sub> H <sub>4</sub> S (Thiirane)                             | 9.05  | -0.78              | 9.93               | 27.06 |
| CH <sub>3</sub> SOCH <sub>3</sub> (Dimethyl sulfoxide)                 | 9.10  | -0.40 <sup>b</sup> | 9.54 <sup>b</sup>  | 36.89 |
| CH <sub>2</sub> CHF (Ethene, fluoro-)                                  | 10.63 | -0.88              | 11.55              | 24.81 |
| CH <sub>3</sub> CH <sub>2</sub> Cl (Ethyl chloride)                    | 11.06 | -0.51              | 11.74              | 29.96 |
| CH <sub>2</sub> CHCl (Ethene, chloro-)                                 | 10.20 | -1.12              | 11.35              | 23.51 |
| CH <sub>3</sub> COCl (Acetyl Chloride)                                 | 11.03 | -0.85              | 11.97              | 28.90 |
| CH <sub>2</sub> ClCH <sub>2</sub> CH <sub>3</sub> (Propane, 1-chloro-) | 10.88 | -0.49 <sup>b</sup> | 11.63 <sup>b</sup> | 42.65 |
| N(CH <sub>3</sub> ) <sub>3</sub> (Trimethylamine)                      | 8.54  | -0.54 <sup>b</sup> | 9.10 <sup>b</sup>  | 50.20 |
| C <sub>4</sub> H <sub>4</sub> O (Furan)                                | 8.90  | -0.74 <sup>b</sup> | 9.82 <sup>b</sup>  | 42.99 |
| C <sub>4</sub> H <sub>5</sub> N (Pyrrole)                              | 8.23  | -0.51 <sup>b</sup> | 8.89 <sup>b</sup>  | 46.34 |
| NO <sub>2</sub> (Nitrogen dioxide)                                     | 11.23 | 1.44               | 9.79               | 9.80  |
| SF <sub>6</sub> (Sulfur Hexafluoride)                                  | 15.70 | -1.05 <sup>b</sup> | 16.98 <sup>b</sup> | 20.77 |
| CFCl <sub>3</sub> (Trichloromonofluoromethane)                         | 11.76 | -0.68              | 12.61              | 15.22 |
| CF <sub>3</sub> Cl (Methane, chlorotrifluoro-)                         | 13.08 | -1.06              | 14.27              | 18.85 |
| CF <sub>3</sub> Br (Bromotrifluoromethane)                             | 12.08 | -0.81 <sup>b</sup> | 12.97 <sup>b</sup> | 18.35 |
| HCCF (Fluoroacetylene)                                                 | 11.50 | -0.55              | 12.04              | 17.19 |
| HCCCN (Cyanoacetylene)                                                 | 11.75 | -0.36              | 12.20              | 25.93 |
| C <sub>4</sub> N <sub>2</sub> (2-Butynedinitrile)                      | 11.84 | 0.68               | 11.52              | 34.15 |
| C <sub>2</sub> N <sub>2</sub> (Cyanogen)                               | 13.51 | -0.19              | 13.90              | 21.60 |

|                                                           |       |                    |                    |       |
|-----------------------------------------------------------|-------|--------------------|--------------------|-------|
| C <sub>3</sub> O <sub>2</sub> (Carbon suboxide)           | 10.80 | -0.74              | 11.64              | 28.58 |
| FCN (Cyanogen fluoride)                                   | 13.65 | -0.66              | 14.33              | 13.19 |
| C <sub>4</sub> H <sub>2</sub> (Diacetylene)               | 10.30 | -0.64              | 11.00              | 30.05 |
| H <sub>2</sub> CS (Thioformaldehyde)                      | 9.38  | 0.28               | 9.18               | 14.07 |
| CHONH <sub>2</sub> (Formamide)                            | 10.40 | -0.35              | 10.81              | 24.56 |
| CH <sub>2</sub> CHCHO (Acrolein)                          | 10.10 | -0.46 <sup>b</sup> | 10.70 <sup>b</sup> | 35.76 |
| CH <sub>2</sub> CCl <sub>2</sub> (Ethene, 1,1-dichloro-)  | 10.00 | -1.07              | 11.17              | 22.48 |
| C <sub>2</sub> HF <sub>3</sub> (Trifluoroethylene)        | 10.62 | -0.54              | 11.11              | 25.31 |
| CH <sub>2</sub> CF <sub>2</sub> (Ethene, 1,1-difluoro-)   | 10.70 | -1.03              | 11.81              | 25.38 |
| CH <sub>3</sub> F (Methyl fluoride)                       | 13.04 | -0.58              | 14.09              | 18.31 |
| CF <sub>2</sub> Cl <sub>2</sub> (Difluorodichloromethane) | 12.24 | -0.90              | 13.33              | 16.97 |
| SiF <sub>2</sub> (Silicon difluoride)                     | 11.08 | 0.10               | 11.04              | 12.93 |

<sup>a</sup> The reference values for the IP131 database, which were published in [Y.-S. Lin, C.-W. Tsai, G.-D. Li, and J.-D. Chai, *J. Chem. Phys.*, 2012, **136**, 154109], are listed for completeness of this work.

<sup>b</sup> Most of the reference values for the EA131 and FG131 databases were published in the EA115 and FG115 databases [Y.-S. Lin, C.-W. Tsai, G.-D. Li, and J.-D. Chai, *J. Chem. Phys.*, 2012, **136**, 154109]. For clarity, the reference values for the additional 16 molecules are labelled with the (<sup>b</sup>).

TABLE II: Atomization energies (in eV) of the AE113 database. The atomization energies are calculated without the zero-point energy correction.

| Molecule                          | LSDA  | PBE   | BLYP  | M06L  | VS98  | B3LYP | M06-2X | $\omega$ B97 | $\omega$ B97X | $\omega$ B97X-D | LB94   | LB $\alpha$ | Ref.  |
|-----------------------------------|-------|-------|-------|-------|-------|-------|--------|--------------|---------------|-----------------|--------|-------------|-------|
| CH <sub>3</sub>                   | 14.71 | 13.44 | 13.32 | 13.31 | 13.44 | 13.45 | 13.29  | 13.27        | 13.30         | 13.31           | 7.84   | 12.67       | 13.32 |
| CH <sub>4</sub>                   | 20.04 | 18.21 | 18.08 | 18.14 | 18.24 | 18.26 | 18.15  | 18.11        | 18.14         | 18.16           | 9.69   | 16.58       | 18.19 |
| NH                                | 4.15  | 3.84  | 3.89  | 3.59  | 3.60  | 3.82  | 3.61   | 3.66         | 3.65          | 3.65            | 4.81   | 5.13        | 3.60  |
| NH <sub>2</sub>                   | 9.02  | 8.18  | 8.23  | 7.86  | 7.92  | 8.16  | 7.86   | 7.94         | 7.94          | 7.95            | 8.73   | 10.25       | 7.91  |
| NH <sub>3</sub>                   | 14.63 | 13.10 | 13.09 | 12.66 | 12.82 | 13.06 | 12.84  | 12.86        | 12.87         | 12.90           | 12.22  | 15.54       | 12.91 |
| OH                                | 5.40  | 4.78  | 4.77  | 4.55  | 4.67  | 4.71  | 4.63   | 4.60         | 4.63          | 4.65            | 5.86   | 6.58        | 4.65  |
| H <sub>2</sub> O                  | 11.58 | 10.18 | 10.11 | 9.77  | 10.04 | 10.04 | 10.03  | 9.92         | 9.97          | 10.02           | 10.64  | 13.07       | 10.11 |
| HF                                | 7.05  | 6.18  | 6.14  | 5.92  | 6.17  | 6.07  | 6.07   | 6.04         | 6.04          | 6.07            | 7.53   | 8.63        | 6.16  |
| SiH <sub>3</sub>                  | 10.67 | 9.62  | 9.71  | 10.06 | 9.86  | 9.90  | 9.88   | 9.86         | 9.89          | 9.88            | -1.07  | 3.84        | 9.88  |
| SiH <sub>4</sub>                  | 15.04 | 13.58 | 13.77 | 14.26 | 14.02 | 14.03 | 13.94  | 14.07        | 14.07         | 14.04           | -0.48  | 6.07        | 14.07 |
| PH <sub>3</sub>                   | 11.74 | 10.40 | 10.54 | 10.51 | 10.53 | 10.65 | 10.57  | 10.48        | 10.57         | 10.62           | 2.27   | 6.80        | 10.46 |
| SH <sub>2</sub>                   | 8.95  | 7.90  | 7.84  | 7.89  | 8.02  | 7.91  | 7.90   | 7.86         | 7.92          | 7.96            | 2.86   | 6.40        | 7.93  |
| HCl                               | 5.24  | 4.64  | 4.55  | 4.65  | 4.67  | 4.58  | 4.61   | 4.58         | 4.60          | 4.63            | 2.58   | 4.40        | 4.65  |
| HCCH                              | 19.96 | 18.00 | 17.58 | 17.62 | 17.64 | 17.49 | 17.53  | 17.35        | 17.39         | 17.40           | 10.15  | 17.96       | 17.49 |
| CH <sub>2</sub> CH <sub>2</sub>   | 27.44 | 24.80 | 24.33 | 24.40 | 24.47 | 24.43 | 24.36  | 24.28        | 24.33         | 24.35           | 12.95  | 23.44       | 24.38 |
| CH <sub>3</sub> CH <sub>3</sub>   | 34.43 | 31.09 | 30.55 | 30.81 | 30.79 | 30.86 | 30.82  | 30.82        | 30.84         | 30.85           | 15.56  | 28.75       | 30.84 |
| HCN                               | 15.68 | 14.17 | 13.91 | 13.58 | 13.50 | 13.61 | 13.52  | 13.47        | 13.46         | 13.45           | 10.33  | 16.54       | 13.51 |
| CO                                | 13.02 | 11.70 | 11.39 | 11.22 | 11.22 | 11.11 | 11.28  | 11.19        | 11.17         | 11.17           | 3.17   | 10.12       | 11.22 |
| HCO                               | 14.41 | 12.78 | 12.44 | 12.16 | 12.21 | 12.14 | 12.04  | 12.05        | 12.06         | 12.09           | 3.91   | 11.75       | 12.01 |
| CH <sub>2</sub> O                 | 18.87 | 16.78 | 16.43 | 16.25 | 16.24 | 16.24 | 16.22  | 16.17        | 16.19         | 16.22           | 6.14   | 15.52       | 16.20 |
| CH <sub>3</sub> OH                | 25.45 | 22.57 | 22.18 | 21.99 | 22.07 | 22.21 | 22.25  | 22.13        | 22.17         | 22.21           | 16.11  | 24.66       | 22.22 |
| N <sub>2</sub>                    | 11.62 | 10.56 | 10.42 | 9.76  | 9.62  | 9.95  | 9.81   | 9.95         | 9.86          | 9.79            | 10.45  | 14.09       | 9.85  |
| NH <sub>2</sub> NH <sub>2</sub>   | 22.19 | 19.49 | 19.24 | 18.50 | 18.48 | 19.09 | 18.81  | 18.91        | 18.90         | 18.90           | 19.16  | 25.42       | 18.82 |
| NO                                | 8.66  | 7.49  | 7.24  | 6.60  | 6.59  | 6.75  | 6.59   | 6.81         | 6.73          | 6.68            | 9.87   | 12.49       | 6.57  |
| O <sub>2</sub>                    | 7.59  | 6.24  | 5.89  | 5.40  | 5.54  | 5.38  | 5.29   | 5.51         | 5.44          | 5.42            | 2.54   | 7.37        | 5.20  |
| HOOH                              | 14.47 | 12.19 | 11.93 | 11.23 | 11.44 | 11.54 | 11.52  | 11.42        | 11.46         | 11.52           | 12.66  | 16.74       | 11.62 |
| F <sub>2</sub>                    | 3.34  | 2.25  | 2.09  | 1.55  | 1.68  | 1.57  | 1.40   | 1.61         | 1.54          | 1.52            | 0.23   | 2.17        | 1.67  |
| CO <sub>2</sub>                   | 20.62 | 18.13 | 17.41 | 17.38 | 17.13 | 16.90 | 16.99  | 16.95        | 16.97         | 17.03           | 2.79   | 16.39       | 16.85 |
| P <sub>2</sub>                    | 6.29  | 5.30  | 5.30  | 5.06  | 5.01  | 5.06  | 5.24   | 4.71         | 4.93          | 5.07            | 4.93   | 6.34        | 4.99  |
| S <sub>2</sub>                    | 5.87  | 4.97  | 4.64  | 4.81  | 4.71  | 4.47  | 4.52   | 4.38         | 4.48          | 4.57            | 0.86   | 4.21        | 4.41  |
| Cl <sub>2</sub>                   | 3.59  | 2.82  | 2.49  | 2.69  | 2.38  | 2.39  | 2.57   | 2.41         | 2.47          | 2.54            | -1.54  | 1.31        | 2.53  |
| NaCl                              | 4.55  | 4.13  | 4.01  | 4.83  | 4.38  | 4.06  | 4.32   | 4.46         | 4.46          | 4.35            | 0.82   | 2.56        | 4.32  |
| SiO                               | 9.70  | 8.48  | 8.44  | 8.20  | 8.22  | 8.12  | 8.24   | 8.12         | 8.14          | 8.13            | 1.74   | 6.64        | 8.25  |
| CS                                | 8.79  | 7.79  | 7.48  | 7.56  | 7.52  | 7.22  | 7.33   | 7.17         | 7.22          | 7.28            | 3.31   | 6.78        | 7.37  |
| ClO                               | 4.54  | 3.53  | 3.24  | 2.97  | 2.88  | 2.88  | 2.81   | 2.81         | 2.85          | 2.90            | 4.64   | 6.10        | 2.74  |
| ClF                               | 4.13  | 3.12  | 2.89  | 2.65  | 2.63  | 2.62  | 2.69   | 2.67         | 2.66          | 2.68            | 6.50   | 7.06        | 2.68  |
| SiH <sub>3</sub> SiH <sub>3</sub> | 25.07 | 22.49 | 22.50 | 23.55 | 23.20 | 22.98 | 22.98  | 23.30        | 23.27         | 23.19           | -6.49  | 7.29        | 23.19 |
| CH <sub>3</sub> Cl                | 19.40 | 17.35 | 16.90 | 17.16 | 17.01 | 17.02 | 17.11  | 17.07        | 17.09         | 17.10           | 6.50   | 14.66       | 17.08 |
| CH <sub>3</sub> SH                | 23.25 | 20.72 | 20.26 | 20.47 | 20.49 | 20.44 | 20.51  | 20.47        | 20.52         | 20.54           | 9.62   | 18.94       | 20.50 |
| SO <sub>2</sub>                   | 14.54 | 12.09 | 11.48 | 11.21 | 11.06 | 10.87 | 10.90  | 10.92        | 10.99         | 11.07           | -9.08  | 5.22        | 10.97 |
| BF <sub>3</sub>                   | 23.88 | 20.93 | 20.36 | 20.33 | 20.53 | 20.22 | 20.63  | 20.37        | 20.35         | 20.30           | -4.41  | 10.68       | 20.40 |
| BCl <sub>3</sub>                  | 16.69 | 14.67 | 13.63 | 14.77 | 14.20 | 13.72 | 14.29  | 14.18        | 14.19         | 14.18           | -9.02  | 4.00        | 14.02 |
| AlCl <sub>3</sub>                 | 14.99 | 13.35 | 12.60 | 14.02 | 13.72 | 12.83 | 13.57  | 13.52        | 13.49         | 13.42           | -15.10 | -3.36       | 13.57 |

|                                                 |       |       |       |       |       |       |       |       |       |       |        |       |       |
|-------------------------------------------------|-------|-------|-------|-------|-------|-------|-------|-------|-------|-------|--------|-------|-------|
| CF <sub>4</sub>                                 | 26.13 | 21.94 | 20.75 | 20.69 | 20.69 | 20.45 | 21.01 | 21.00 | 20.91 | 20.82 | -18.21 | 5.58  | 20.80 |
| CCl <sub>4</sub>                                | 17.55 | 14.57 | 13.04 | 14.18 | 13.52 | 12.97 | 13.81 | 13.70 | 13.67 | 13.62 | -9.11  | 5.44  | 13.59 |
| OCS                                             | 17.81 | 15.64 | 14.93 | 15.15 | 14.87 | 14.50 | 14.61 | 14.47 | 14.53 | 14.63 | 5.31   | 14.89 | 14.45 |
| CS <sub>2</sub>                                 | 14.96 | 13.09 | 12.37 | 12.87 | 12.54 | 12.03 | 12.16 | 11.83 | 11.96 | 12.12 | 7.78   | 13.69 | 12.00 |
| CF <sub>2</sub> O                               | 22.85 | 19.53 | 18.58 | 18.45 | 18.33 | 18.13 | 18.40 | 18.42 | 18.38 | 18.36 | -6.99  | 11.27 | 18.21 |
| SiF <sub>4</sub>                                | 28.28 | 24.58 | 24.05 | 24.22 | 24.82 | 23.96 | 24.69 | 24.59 | 24.44 | 24.24 | -17.96 | 2.67  | 24.92 |
| N <sub>2</sub> O                                | 15.75 | 13.51 | 12.89 | 12.25 | 11.88 | 12.00 | 11.63 | 11.89 | 11.82 | 11.82 | 9.66   | 18.74 | 11.66 |
| NF <sub>3</sub>                                 | 13.63 | 10.67 | 9.92  | 9.04  | 9.10  | 9.07  | 8.98  | 9.40  | 9.22  | 9.11  | -7.69  | 4.90  | 8.94  |
| PF <sub>3</sub>                                 | 19.05 | 15.99 | 15.56 | 15.24 | 15.49 | 15.32 | 15.69 | 15.59 | 15.59 | 15.52 | -9.92  | 4.55  | 15.64 |
| O <sub>3</sub>                                  | 10.50 | 8.04  | 7.41  | 6.33  | 6.43  | 6.09  | 5.58  | 6.00  | 5.95  | 6.01  | 2.66   | 10.31 | 6.26  |
| F <sub>2</sub> O                                | 7.40  | 5.35  | 4.94  | 3.99  | 4.19  | 4.04  | 3.82  | 4.11  | 4.02  | 3.98  | -1.17  | 4.18  | 4.04  |
| ClF <sub>3</sub>                                | 9.95  | 7.12  | 6.41  | 5.66  | 5.80  | 5.53  | 5.33  | 5.60  | 5.54  | 5.54  | -19.25 | -5.94 | 5.43  |
| CF <sub>2</sub> CF <sub>2</sub>                 | 32.49 | 27.50 | 26.00 | 25.85 | 25.80 | 25.47 | 25.89 | 25.91 | 25.84 | 25.78 | -28.32 | 2.89  | 25.54 |
| CF <sub>3</sub> CN                              | 34.44 | 29.67 | 28.25 | 28.00 | 27.74 | 27.63 | 28.00 | 28.06 | 27.94 | 27.83 | -10.05 | 17.83 | 27.77 |
| CH <sub>3</sub> CCH                             | 34.78 | 31.26 | 30.41 | 30.70 | 30.57 | 30.45 | 30.54 | 30.39 | 30.43 | 30.42 | 16.56  | 30.76 | 30.43 |
| CH <sub>2</sub> CCH <sub>2</sub>                | 34.95 | 31.42 | 30.57 | 30.75 | 30.73 | 30.57 | 30.54 | 30.39 | 30.45 | 30.48 | 16.87  | 31.04 | 30.40 |
| cylC <sub>3</sub> H <sub>4</sub>                | 34.06 | 30.45 | 29.37 | 29.94 | 29.65 | 29.45 | 29.70 | 29.65 | 29.59 | 29.52 | 12.97  | 29.38 | 29.45 |
| cylC <sub>3</sub> H <sub>6</sub>                | 42.03 | 37.68 | 36.54 | 37.20 | 36.92 | 36.87 | 37.12 | 37.15 | 37.09 | 37.02 | 16.45  | 35.55 | 36.91 |
| CH <sub>3</sub> CH <sub>2</sub> CH <sub>3</sub> | 48.93 | 44.02 | 43.07 | 43.56 | 43.46 | 43.53 | 43.59 | 43.61 | 43.62 | 43.63 | 21.07  | 40.80 | 43.58 |
| CH <sub>3</sub> CCCH <sub>3</sub>               | 49.54 | 44.48 | 43.21 | 43.70 | 43.43 | 43.34 | 43.48 | 43.37 | 43.39 | 43.37 | 24.19  | 44.18 | 43.32 |
| cylC <sub>4</sub> H <sub>6</sub>                | 49.68 | 44.43 | 42.88 | 43.59 | 43.29 | 43.14 | 43.37 | 43.43 | 43.40 | 43.39 | 17.59  | 41.00 | 43.28 |
| isobutane                                       | 63.50 | 56.98 | 55.58 | 56.31 | 56.29 | 56.18 | 56.40 | 56.44 | 56.42 | 56.42 | 26.09  | 52.50 | 56.37 |
| benzene                                         | 68.31 | 61.17 | 58.88 | 59.76 | 59.47 | 59.07 | 59.35 | 59.19 | 59.26 | 59.29 | 27.20  | 58.81 | 59.14 |
| CH <sub>2</sub> F <sub>2</sub>                  | 22.51 | 19.62 | 19.04 | 18.86 | 18.94 | 18.93 | 19.08 | 19.08 | 19.04 | 19.01 | 4.26   | 16.18 | 18.99 |
| CF <sub>3</sub> H                               | 24.36 | 20.84 | 19.97 | 19.79 | 19.85 | 19.74 | 20.06 | 20.07 | 20.01 | 19.94 | -6.08  | 11.35 | 19.92 |
| CH <sub>2</sub> Cl <sub>2</sub>                 | 18.86 | 16.55 | 15.77 | 16.29 | 15.92 | 15.84 | 16.17 | 16.09 | 16.11 | 16.11 | 3.95   | 13.79 | 16.05 |
| CCl <sub>3</sub> H                              | 18.25 | 15.61 | 14.46 | 15.26 | 14.73 | 14.46 | 15.04 | 14.95 | 14.94 | 14.91 | -2.26  | 9.91  | 14.87 |
| CH <sub>3</sub> NO <sub>2</sub>                 | 32.34 | 27.91 | 26.85 | 26.25 | 26.11 | 26.19 | 26.01 | 26.29 | 26.24 | 26.22 | 12.46  | 29.97 | 26.01 |
| CH <sub>3</sub> SiH <sub>3</sub>                | 29.93 | 26.95 | 26.73 | 27.38 | 27.18 | 27.12 | 27.13 | 27.26 | 27.26 | 27.22 | 4.71   | 17.89 | 27.22 |
| HCOOH                                           | 25.79 | 22.50 | 21.80 | 21.47 | 21.47 | 21.47 | 21.60 | 21.49 | 21.54 | 21.58 | 10.06  | 23.05 | 21.49 |
| CH <sub>3</sub> CONH <sub>2</sub>               | 43.90 | 38.87 | 37.78 | 37.56 | 37.47 | 37.63 | 37.61 | 37.70 | 37.69 | 37.69 | 19.30  | 38.82 | 37.48 |
| cylNHC <sub>2</sub> H <sub>4</sub>              | 36.07 | 32.10 | 31.14 | 31.34 | 30.98 | 31.21 | 31.32 | 31.39 | 31.32 | 31.26 | 17.48  | 33.38 | 31.11 |
| NCCN                                            | 26.12 | 23.39 | 22.60 | 22.18 | 21.76 | 21.88 | 21.73 | 21.68 | 21.64 | 21.62 | 15.52  | 29.78 | 21.59 |
| CH <sub>3</sub> NHCH <sub>3</sub>               | 42.93 | 38.33 | 37.56 | 37.51 | 37.42 | 37.78 | 37.73 | 37.75 | 37.75 | 37.76 | 25.53  | 40.84 | 37.66 |
| CH <sub>2</sub> CO                              | 27.29 | 24.26 | 23.47 | 23.52 | 23.41 | 23.20 | 23.24 | 23.13 | 23.17 | 23.22 | -0.86  | 17.85 | 23.03 |
| cylOC <sub>2</sub> H <sub>4</sub>               | 32.89 | 29.11 | 28.15 | 28.38 | 28.13 | 28.14 | 28.39 | 28.33 | 28.30 | 28.28 | 13.71  | 29.18 | 28.18 |
| OCHCHO                                          | 32.74 | 28.84 | 27.86 | 27.63 | 27.52 | 27.40 | 27.49 | 27.47 | 27.48 | 27.49 | 2.56   | 23.49 | 27.39 |
| CH <sub>3</sub> CH <sub>2</sub> OH              | 40.06 | 35.62 | 34.80 | 34.84 | 34.85 | 34.98 | 35.11 | 35.02 | 35.05 | 35.07 | 20.99  | 36.15 | 35.06 |
| CH <sub>3</sub> OCH <sub>3</sub>                | 39.58 | 35.15 | 34.40 | 34.42 | 34.41 | 34.55 | 34.69 | 34.54 | 34.58 | 34.59 | 24.58  | 38.57 | 34.55 |
| cylSC <sub>2</sub> H <sub>4</sub>               | 31.25 | 27.78 | 26.74 | 27.39 | 27.05 | 26.90 | 27.24 | 27.18 | 27.16 | 27.14 | 10.70  | 25.84 | 27.06 |
| CH <sub>3</sub> SOCH <sub>3</sub>               | 42.99 | 37.82 | 36.64 | 36.94 | 36.92 | 36.73 | 36.92 | 36.92 | 36.96 | 36.99 | 9.16   | 32.20 | 36.89 |
| CH <sub>2</sub> CHF                             | 28.84 | 25.62 | 24.92 | 24.89 | 24.95 | 24.85 | 24.89 | 24.84 | 24.85 | 24.85 | 10.34  | 23.43 | 24.81 |
| CH <sub>3</sub> CH <sub>2</sub> Cl              | 34.04 | 30.42 | 29.56 | 30.06 | 29.85 | 29.83 | 30.03 | 30.00 | 30.02 | 30.01 | 13.61  | 28.14 | 29.96 |
| CH <sub>2</sub> CHCl                            | 27.15 | 24.22 | 23.39 | 23.75 | 23.57 | 23.44 | 23.59 | 23.49 | 23.53 | 23.54 | 7.55   | 20.40 | 23.51 |
| CH <sub>3</sub> CClO                            | 34.07 | 30.11 | 28.98 | 29.31 | 29.02 | 28.82 | 29.04 | 29.00 | 29.02 | 29.04 | 6.83   | 25.63 | 28.90 |
| prpCl                                           | 48.52 | 43.35 | 42.06 | 42.75 | 42.49 | 42.44 | 42.74 | 42.75 | 42.74 | 42.73 | 18.16  | 38.97 | 42.65 |

|                                    |       |       |       |       |       |       |       |       |       |       |        |        |       |
|------------------------------------|-------|-------|-------|-------|-------|-------|-------|-------|-------|-------|--------|--------|-------|
| NC <sub>3</sub> H <sub>9</sub>     | 57.32 | 51.08 | 49.88 | 50.07 | 50.05 | 50.23 | 50.34 | 50.35 | 50.33 | 50.32 | 32.76  | 53.92  | 50.20 |
| cyIOC <sub>4</sub> H <sub>4</sub>  | 50.63 | 44.80 | 42.98 | 43.38 | 43.15 | 42.90 | 43.25 | 43.07 | 43.12 | 43.14 | 20.68  | 45.19  | 42.99 |
| cyINHC <sub>4</sub> H <sub>4</sub> | 54.29 | 48.23 | 46.38 | 46.71 | 46.45 | 46.41 | 46.60 | 46.54 | 46.56 | 46.58 | 24.84  | 49.43  | 46.34 |
| NO <sub>2</sub>                    | 14.10 | 11.75 | 11.07 | 10.31 | 10.18 | 10.14 | 9.75  | 10.14 | 10.07 | 10.08 | 1.56   | 12.57  | 9.80  |
| SF <sub>6</sub>                    | 28.23 | 21.99 | 20.23 | 20.34 | 20.80 | 19.79 | 20.72 | 20.79 | 20.66 | 20.46 | -57.93 | -17.79 | 20.77 |
| CFCl <sub>3</sub>                  | 19.60 | 16.35 | 14.94 | 15.69 | 15.19 | 14.75 | 15.46 | 15.42 | 15.37 | 15.30 | -13.04 | 4.16   | 15.22 |
| CCIF <sub>3</sub>                  | 23.91 | 20.06 | 18.80 | 18.97 | 18.81 | 18.52 | 19.08 | 19.10 | 19.01 | 18.92 | -18.87 | 3.44   | 18.85 |
| CBrF <sub>3</sub>                  | 23.39 | 19.60 | 18.39 | 18.36 | 18.34 | 18.05 | 18.39 | 18.55 | 18.46 | 18.37 | -21.34 | 1.29   | 18.34 |
| HCCF                               | 20.75 | 18.19 | 17.49 | 17.55 | 17.42 | 17.23 | 17.40 | 17.23 | 17.24 | 17.24 | 5.10   | 16.43  | 17.19 |
| HCCCN                              | 30.78 | 27.58 | 26.63 | 26.57 | 26.25 | 26.12 | 26.08 | 25.88 | 25.90 | 25.90 | 16.64  | 31.47  | 25.93 |
| NCCCCN                             | 41.41 | 36.94 | 35.47 | 35.36 | 34.67 | 34.60 | 34.50 | 34.26 | 34.27 | 34.27 | 19.34  | 45.43  | 34.15 |
| C <sub>2</sub> N <sub>2</sub>      | 26.12 | 23.39 | 22.60 | 22.18 | 21.76 | 21.88 | 21.73 | 21.68 | 21.64 | 21.62 | 15.52  | 29.78  | 21.59 |
| C <sub>3</sub> O <sub>2</sub>      | 35.52 | 31.24 | 29.80 | 30.01 | 29.53 | 29.04 | 29.06 | 28.77 | 28.88 | 29.03 | -9.62  | 21.28  | 28.58 |
| FCN                                | 16.45 | 14.37 | 13.80 | 13.56 | 13.30 | 13.31 | 13.33 | 13.31 | 13.27 | 13.25 | 2.60   | 13.30  | 13.19 |
| HCCCCH                             | 35.22 | 31.55 | 30.43 | 30.74 | 30.52 | 30.15 | 30.25 | 29.89 | 29.97 | 30.00 | 17.39  | 32.77  | 30.05 |
| H <sub>2</sub> CS                  | 16.25 | 14.45 | 14.07 | 14.15 | 14.16 | 14.02 | 14.06 | 13.92 | 14.00 | 14.06 | 6.74   | 13.51  | 14.07 |
| HCONH <sub>2</sub>                 | 29.16 | 25.70 | 25.03 | 24.62 | 24.55 | 24.78 | 24.67 | 24.70 | 24.73 | 24.75 | 14.96  | 27.77  | 24.56 |
| CH <sub>2</sub> CHCHO              | 41.55 | 37.06 | 35.95 | 36.02 | 35.98 | 35.80 | 35.84 | 35.76 | 35.81 | 35.83 | 12.06  | 33.27  | 35.76 |
| CH <sub>2</sub> CCl <sub>2</sub>   | 26.72 | 23.46 | 22.25 | 22.97 | 22.53 | 22.25 | 22.66 | 22.55 | 22.57 | 22.55 | 5.90   | 20.31  | 22.48 |
| CHF <sub>2</sub> CF <sub>2</sub>   | 31.28 | 26.91 | 25.68 | 25.55 | 25.53 | 25.28 | 25.57 | 25.57 | 25.52 | 25.48 | -12.33 | 11.61  | 25.31 |
| CH <sub>2</sub> CF <sub>2</sub>    | 30.41 | 26.57 | 25.58 | 25.56 | 25.57 | 25.37 | 25.57 | 25.54 | 25.52 | 25.50 | 2.23   | 20.01  | 25.38 |
| CH <sub>3</sub> F                  | 20.96 | 18.64 | 18.32 | 18.23 | 18.31 | 18.34 | 18.34 | 18.32 | 18.32 | 18.32 | 10.93  | 18.79  | 18.31 |
| CF <sub>2</sub> Cl <sub>2</sub>    | 21.71 | 18.17 | 16.84 | 17.28 | 16.96 | 16.59 | 17.21 | 17.23 | 17.15 | 17.06 | -16.41 | 3.41   | 16.97 |
| SiF <sub>2</sub>                   | 14.87 | 12.95 | 12.79 | 12.66 | 12.93 | 12.59 | 12.85 | 12.86 | 12.79 | 12.67 | 2.17   | 9.27   | 12.93 |
| MSE                                | 3.75  | 0.84  | 0.13  | 0.17  | 0.07  | -0.04 | 0.07  | 0.05  | 0.05  | 0.04  | -15.24 | -2.36  |       |
| MAE                                | 3.75  | 0.88  | 0.36  | 0.27  | 0.14  | 0.16  | 0.12  | 0.12  | 0.10  | 0.10  | 15.53  | 4.81   |       |
| rms                                | 4.22  | 1.06  | 0.48  | 0.36  | 0.20  | 0.23  | 0.16  | 0.15  | 0.13  | 0.14  | 20.02  | 7.44   |       |



TABLE III:  $-\epsilon_N(N)$  (in eV) of the IP131 database.

| Molecule                        | LSDA   | PBE    | BLYP   | M06L   | VS98   | B3LYP  | M06-2X | $\omega$ B97 | $\omega$ B97X | $\omega$ B97X-D | LB94   | LB $\alpha$ | Ref.  |
|---------------------------------|--------|--------|--------|--------|--------|--------|--------|--------------|---------------|-----------------|--------|-------------|-------|
| H                               | -7.32  | -7.59  | -7.40  | -7.92  | -7.71  | -8.77  | -10.32 | -11.91       | -11.62        | -11.06          | -11.96 | -11.45      | 13.60 |
| He                              | -15.52 | -15.76 | -15.91 | -16.53 | -16.16 | -18.00 | -20.62 | -21.13       | -20.90        | -20.26          | -23.15 | -22.22      | 24.59 |
| Li                              | -3.16  | -3.22  | -3.03  | -3.11  | -3.20  | -3.65  | -4.18  | -5.32        | -5.31         | -5.21           | -5.24  | -5.07       | 5.39  |
| Be                              | -5.60  | -5.61  | -5.47  | -5.71  | -5.66  | -6.32  | -7.26  | -8.76        | -8.63         | -8.29           | -8.71  | -8.40       | 9.32  |
| B                               | -4.11  | -4.17  | -4.06  | -4.45  | -4.10  | -5.17  | -6.17  | -7.91        | -7.73         | -7.24           | -8.16  | -7.76       | 8.30  |
| C                               | -6.13  | -6.10  | -5.95  | -6.36  | -6.20  | -7.34  | -8.84  | -10.36       | -10.14        | -9.57           | -10.92 | -10.50      | 11.26 |
| N                               | -8.42  | -8.31  | -8.10  | -8.79  | -8.55  | -9.79  | -11.78 | -12.94       | -12.72        | -12.14          | -13.90 | -13.49      | 14.53 |
| O                               | -7.47  | -7.60  | -7.63  | -8.00  | -7.37  | -9.28  | -11.21 | -12.38       | -12.12        | -11.49          | -14.30 | -13.18      | 13.62 |
| F                               | -10.40 | -10.32 | -10.35 | -10.73 | -10.35 | -12.32 | -14.83 | -15.43       | -15.24        | -14.63          | -17.70 | -16.72      | 17.42 |
| Ne                              | -13.60 | -13.38 | -13.40 | -14.06 | -13.71 | -15.69 | -18.68 | -18.73       | -18.63        | -18.08          | -21.33 | -20.52      | 21.57 |
| Na                              | -3.08  | -3.03  | -2.90  | -2.93  | -2.81  | -3.48  | -4.18  | -4.82        | -4.91         | -4.87           | -5.53  | -5.20       | 5.14  |
| Mg                              | -4.77  | -4.70  | -4.57  | -4.70  | -4.66  | -5.29  | -6.18  | -7.35        | -7.31         | -7.08           | -7.85  | -7.45       | 7.65  |
| Al                              | -3.00  | -3.09  | -2.84  | -3.02  | -3.07  | -3.62  | -4.30  | -5.88        | -5.77         | -5.47           | -5.78  | -5.56       | 5.99  |
| Si                              | -4.56  | -4.61  | -4.32  | -4.55  | -4.73  | -5.28  | -6.25  | -7.93        | -7.72         | -7.31           | -7.84  | -7.61       | 8.15  |
| P                               | -6.30  | -6.30  | -5.97  | -6.42  | -6.51  | -7.12  | -8.36  | -10.08       | -9.78         | -9.26           | -10.01 | -9.79       | 10.49 |
| S                               | -6.16  | -6.15  | -6.05  | -6.08  | -6.13  | -7.20  | -8.51  | -10.08       | -9.83         | -9.31           | -10.95 | -10.25      | 10.36 |
| Cl                              | -8.22  | -8.14  | -8.03  | -8.24  | -8.25  | -9.36  | -10.96 | -12.45       | -12.15        | -11.56          | -13.27 | -12.68      | 12.97 |
| Ar                              | -10.41 | -10.30 | -10.16 | -10.58 | -10.53 | -11.68 | -13.57 | -14.89       | -14.56        | -13.92          | -15.75 | -15.28      | 15.76 |
| CH <sub>3</sub>                 | -5.39  | -5.42  | -5.22  | -5.63  | -5.46  | -6.47  | -7.82  | -9.42        | -9.15         | -8.59           | -10.06 | -9.57       | 9.84  |
| CH <sub>4</sub>                 | -9.48  | -9.45  | -9.39  | -9.79  | -9.59  | -10.78 | -12.42 | -13.91       | -13.60        | -12.99          | -14.36 | -13.87      | 13.60 |
| NH                              | -7.98  | -7.92  | -7.74  | -8.27  | -8.13  | -9.37  | -11.27 | -12.49       | -12.24        | -11.65          | -13.23 | -12.83      | 13.49 |
| NH <sub>2</sub>                 | -7.21  | -7.22  | -7.17  | -7.44  | -7.24  | -8.56  | -10.28 | -11.65       | -11.36        | -10.76          | -12.64 | -11.93      | 12.00 |
| NH <sub>3</sub>                 | -6.28  | -6.18  | -6.11  | -6.46  | -6.28  | -7.51  | -9.30  | -10.64       | -10.33        | -9.73           | -11.50 | -10.84      | 10.82 |
| OH                              | -7.43  | -7.38  | -7.38  | -7.60  | -7.37  | -9.02  | -11.08 | -12.16       | -11.89        | -11.27          | -13.65 | -12.77      | 13.02 |
| H <sub>2</sub> O                | -7.40  | -7.24  | -7.20  | -7.53  | -7.37  | -8.83  | -10.96 | -12.02       | -11.73        | -11.11          | -13.16 | -12.46      | 12.62 |
| HF                              | -9.83  | -9.65  | -9.64  | -10.04 | -9.85  | -11.56 | -14.08 | -14.73       | -14.50        | -13.90          | -16.38 | -15.64      | 16.12 |
| SiH <sub>3</sub>                | -5.31  | -5.37  | -5.13  | -5.39  | -5.43  | -6.15  | -7.22  | -8.78        | -8.59         | -8.16           | -9.10  | -8.76       | 8.74  |
| SiH <sub>4</sub>                | -8.53  | -8.52  | -8.44  | -8.82  | -8.69  | -9.67  | -11.08 | -12.66       | -12.37        | -11.82          | -12.92 | -12.47      | 12.30 |
| PH <sub>3</sub>                 | -6.77  | -6.72  | -6.60  | -6.85  | -6.81  | -7.68  | -8.96  | -10.49       | -10.26        | -9.77           | -11.17 | -10.67      | 10.59 |
| SH <sub>2</sub>                 | -6.40  | -6.31  | -6.16  | -6.40  | -6.42  | -7.33  | -8.77  | -10.30       | -10.01        | -9.46           | -10.88 | -10.39      | 10.50 |
| HCl                             | -8.16  | -8.05  | -7.92  | -8.28  | -8.20  | -9.24  | -10.91 | -12.37       | -12.05        | -11.45          | -13.00 | -12.51      | 12.77 |
| HCCH                            | -7.38  | -7.20  | -7.04  | -7.39  | -7.21  | -8.20  | -9.74  | -11.21       | -10.92        | -10.36          | -12.25 | -11.62      | 11.49 |
| CH <sub>2</sub> CH <sub>2</sub> | -6.93  | -6.74  | -6.58  | -6.88  | -6.73  | -7.63  | -9.10  | -10.55       | -10.28        | -9.75           | -11.85 | -11.16      | 10.68 |
| CH <sub>3</sub> CH <sub>3</sub> | -8.16  | -8.17  | -8.13  | -8.50  | -8.28  | -9.45  | -11.00 | -12.43       | -12.15        | -11.59          | -13.05 | -12.58      | 11.99 |
| HCN                             | -9.20  | -9.02  | -8.87  | -9.24  | -9.06  | -10.14 | -11.80 | -13.26       | -12.94        | -12.35          | -14.35 | -13.81      | 13.61 |
| CO                              | -9.13  | -9.04  | -9.01  | -9.34  | -9.22  | -10.54 | -12.29 | -13.75       | -13.44        | -12.81          | -14.36 | -13.87      | 14.01 |
| HCO                             | -5.12  | -5.16  | -5.10  | -5.34  | -5.21  | -6.52  | -8.05  | -9.40        | -9.17         | -8.63           | -10.42 | -9.96       | 9.31  |
| CH <sub>2</sub> O               | -6.35  | -6.26  | -6.23  | -6.58  | -6.35  | -7.68  | -9.52  | -10.58       | -10.36        | -9.82           | -11.85 | -11.26      | 10.89 |
| CH <sub>3</sub> OH              | -6.37  | -6.26  | -6.21  | -6.55  | -6.35  | -7.72  | -9.65  | -10.75       | -10.49        | -9.92           | -11.87 | -11.25      | 10.96 |
| N <sub>2</sub>                  | -10.43 | -10.28 | -10.27 | -10.53 | -10.45 | -11.98 | -13.99 | -15.17       | -14.91        | -14.29          | -15.90 | -15.48      | 15.58 |
| NH <sub>2</sub> NH <sub>2</sub> | -5.36  | -5.30  | -5.24  | -5.57  | -5.40  | -6.62  | -8.38  | -9.66        | -9.38         | -8.80           | -10.66 | -10.04      | 8.98  |
| NO                              | -4.57  | -4.52  | -4.52  | -4.68  | -4.59  | -6.19  | -8.05  | -9.15        | -8.93         | -8.36           | -10.52 | -10.01      | 9.26  |
| O <sub>2</sub>                  | -6.97  | -6.84  | -6.83  | -7.30  | -7.12  | -8.75  | -11.05 | -11.79       | -11.59        | -11.01          | -13.33 | -12.84      | 12.30 |
| HOOH                            | -6.61  | -6.46  | -6.43  | -6.76  | -6.59  | -8.12  | -10.29 | -11.24       | -10.98        | -10.38          | -12.60 | -11.93      | 11.70 |

|                                                 |        |        |        |        |        |        |        |        |        |        |        |        |       |
|-------------------------------------------------|--------|--------|--------|--------|--------|--------|--------|--------|--------|--------|--------|--------|-------|
| F <sub>2</sub>                                  | -9.69  | -9.49  | -9.50  | -10.04 | -9.72  | -11.57 | -14.23 | -14.64 | -14.47 | -13.90 | -16.75 | -16.04 | 15.70 |
| CO <sub>2</sub>                                 | -9.33  | -9.09  | -9.00  | -9.38  | -9.18  | -10.47 | -12.33 | -13.41 | -13.18 | -12.65 | -15.30 | -14.66 | 13.78 |
| P <sub>2</sub>                                  | -7.26  | -7.15  | -6.92  | -7.21  | -7.25  | -7.86  | -9.02  | -10.49 | -10.30 | -9.90  | -11.13 | -10.75 | 10.62 |
| S <sub>2</sub>                                  | -5.83  | -5.83  | -5.62  | -5.83  | -6.00  | -6.81  | -8.13  | -9.70  | -9.41  | -8.88  | -10.13 | -9.86  | 9.55  |
| Cl <sub>2</sub>                                 | -7.44  | -7.33  | -7.19  | -7.51  | -7.48  | -8.48  | -10.09 | -11.50 | -11.20 | -10.63 | -12.33 | -11.89 | 11.49 |
| NaCl                                            | -5.44  | -5.30  | -5.19  | -5.38  | -5.35  | -6.34  | -7.83  | -9.25  | -8.96  | -8.41  | -9.82  | -9.33  | 9.80  |
| SiO                                             | -7.61  | -7.48  | -7.37  | -7.61  | -7.61  | -8.62  | -10.10 | -11.44 | -11.25 | -10.77 | -12.06 | -11.64 | 11.61 |
| CS                                              | -7.45  | -7.40  | -7.30  | -7.56  | -7.58  | -8.68  | -10.22 | -11.78 | -11.50 | -10.92 | -11.96 | -11.60 | 11.34 |
| ClO                                             | -6.37  | -6.30  | -6.23  | -6.41  | -6.33  | -7.74  | -9.50  | -10.73 | -10.48 | -9.91  | -11.89 | -11.29 | 11.01 |
| ClF                                             | -8.00  | -7.86  | -7.77  | -8.12  | -8.04  | -9.24  | -11.05 | -12.33 | -12.04 | -11.45 | -13.44 | -12.94 | 12.77 |
| SiH <sub>3</sub> SiH <sub>3</sub>               | -7.26  | -7.20  | -7.05  | -7.32  | -7.41  | -8.10  | -9.27  | -10.82 | -10.59 | -10.13 | -11.28 | -10.93 | 10.53 |
| CH <sub>3</sub> Cl                              | -7.20  | -7.12  | -6.99  | -7.35  | -7.23  | -8.27  | -9.89  | -11.31 | -11.00 | -10.43 | -12.04 | -11.56 | 11.29 |
| CH <sub>3</sub> SH                              | -5.65  | -5.57  | -5.43  | -5.69  | -5.65  | -6.58  | -8.00  | -9.49  | -9.21  | -8.68  | -10.19 | -9.70  | 9.44  |
| SO <sub>2</sub>                                 | -8.28  | -8.08  | -8.01  | -8.22  | -8.19  | -9.44  | -11.15 | -12.35 | -12.13 | -11.61 | -13.67 | -13.18 | 12.50 |
| BF <sub>3</sub>                                 | -10.32 | -10.07 | -10.03 | -10.49 | -10.32 | -11.96 | -14.51 | -15.01 | -14.84 | -14.28 | -16.99 | -16.29 | 15.96 |
| BCl <sub>3</sub>                                | -7.85  | -7.72  | -7.55  | -7.95  | -7.91  | -8.86  | -10.51 | -11.90 | -11.59 | -11.02 | -12.66 | -12.22 | 11.64 |
| AlCl <sub>3</sub>                               | -8.17  | -8.02  | -7.85  | -8.27  | -8.22  | -9.14  | -10.77 | -12.17 | -11.86 | -11.30 | -12.86 | -12.41 | 12.01 |
| CF <sub>4</sub>                                 | -10.68 | -10.42 | -10.39 | -10.92 | -10.70 | -12.37 | -14.96 | -15.43 | -15.26 | -14.69 | -17.52 | -16.82 | 16.20 |
| CCl <sub>4</sub>                                | -7.82  | -7.69  | -7.53  | -7.93  | -7.97  | -8.84  | -10.51 | -11.90 | -11.59 | -11.01 | -12.66 | -12.22 | 11.69 |
| OCS                                             | -7.66  | -7.50  | -7.33  | -7.66  | -7.59  | -8.47  | -9.86  | -11.22 | -10.99 | -10.53 | -12.55 | -12.05 | 11.19 |
| CS <sub>2</sub>                                 | -6.94  | -6.82  | -6.62  | -6.91  | -6.91  | -7.62  | -8.83  | -10.18 | -9.97  | -9.57  | -11.38 | -10.95 | 10.09 |
| CF <sub>2</sub> O                               | -8.77  | -8.52  | -8.46  | -8.89  | -8.68  | -10.15 | -12.31 | -13.20 | -12.97 | -12.39 | -15.01 | -14.37 | 13.60 |
| SiF <sub>4</sub>                                | -10.96 | -10.69 | -10.64 | -11.13 | -10.97 | -12.54 | -15.02 | -15.61 | -15.42 | -14.85 | -17.53 | -16.82 | 16.40 |
| N <sub>2</sub> O                                | -8.65  | -8.40  | -8.31  | -8.65  | -8.44  | -9.64  | -11.30 | -12.44 | -12.23 | -11.74 | -14.48 | -13.86 | 12.89 |
| NF <sub>3</sub>                                 | -8.63  | -8.45  | -8.44  | -8.82  | -8.69  | -10.11 | -12.14 | -13.13 | -12.90 | -12.33 | -15.22 | -14.58 | 13.60 |
| PF <sub>3</sub>                                 | -7.51  | -7.36  | -7.30  | -7.57  | -7.51  | -8.58  | -10.04 | -11.44 | -11.21 | -10.70 | -12.96 | -12.48 | 12.20 |
| O <sub>3</sub>                                  | -8.25  | -8.02  | -8.01  | -8.29  | -8.16  | -9.72  | -11.68 | -12.78 | -12.55 | -11.97 | -14.40 | -13.78 | 12.73 |
| F <sub>2</sub> O                                | -7.91  | -7.72  | -7.75  | -8.14  | -7.95  | -9.73  | -12.21 | -12.81 | -12.62 | -12.03 | -14.72 | -14.05 | 13.26 |
| ClF <sub>3</sub>                                | -8.18  | -8.00  | -7.95  | -8.30  | -8.23  | -9.63  | -11.72 | -12.68 | -12.44 | -11.87 | -14.39 | -13.82 | 13.05 |
| CF <sub>2</sub> CF <sub>2</sub>                 | -6.56  | -6.31  | -6.26  | -6.50  | -6.42  | -7.61  | -9.24  | -10.42 | -10.22 | -9.71  | -12.78 | -12.12 | 10.69 |
| CF <sub>3</sub> CN                              | -9.77  | -9.57  | -9.44  | -9.82  | -9.67  | -10.80 | -12.55 | -13.90 | -13.60 | -13.00 | -15.26 | -14.80 | 14.30 |
| CH <sub>3</sub> CCH                             | -6.64  | -6.49  | -6.34  | -6.68  | -6.47  | -7.48  | -8.99  | -10.42 | -10.14 | -9.60  | -11.49 | -10.89 | 10.37 |
| CH <sub>2</sub> CCH <sub>2</sub>                | -6.72  | -6.56  | -6.42  | -6.71  | -6.55  | -7.51  | -8.96  | -10.38 | -10.12 | -9.60  | -11.58 | -10.96 | 10.20 |
| cylC <sub>3</sub> H <sub>4</sub>                | -6.23  | -6.11  | -5.98  | -6.26  | -6.07  | -7.04  | -8.50  | -9.88  | -9.63  | -9.11  | -11.20 | -10.58 | 9.86  |
| cylC <sub>3</sub> H <sub>6</sub>                | -7.23  | -7.07  | -6.94  | -7.26  | -7.14  | -8.15  | -9.60  | -11.11 | -10.83 | -10.28 | -12.04 | -11.51 | 10.54 |
| CH <sub>3</sub> CH <sub>2</sub> CH <sub>3</sub> | -7.73  | -7.75  | -7.72  | -8.07  | -7.87  | -9.00  | -10.53 | -11.93 | -11.66 | -11.11 | -12.61 | -12.13 | 11.51 |
| CH <sub>3</sub> CCCH <sub>3</sub>               | -6.06  | -5.93  | -5.79  | -6.12  | -5.89  | -6.91  | -8.38  | -9.78  | -9.51  | -8.99  | -10.90 | -10.31 | 9.79  |
| cylC <sub>4</sub> H <sub>6</sub>                | -6.19  | -6.04  | -5.89  | -6.17  | -6.01  | -6.92  | -8.36  | -9.74  | -9.49  | -8.99  | -11.12 | -10.45 | 9.43  |
| isobutane                                       | -7.59  | -7.58  | -7.53  | -7.86  | -7.75  | -8.78  | -10.27 | -11.68 | -11.42 | -10.87 | -12.39 | -11.93 | 11.13 |
| benzene                                         | -6.54  | -6.33  | -6.14  | -6.42  | -6.28  | -7.08  | -8.42  | -9.69  | -9.49  | -9.06  | -11.44 | -10.75 | 9.25  |
| CH <sub>2</sub> F <sub>2</sub>                  | -8.25  | -8.15  | -8.15  | -8.50  | -8.32  | -9.78  | -11.77 | -12.76 | -12.54 | -11.98 | -14.23 | -13.67 | 13.27 |
| CF <sub>3</sub> H                               | -9.51  | -9.35  | -9.35  | -9.70  | -9.58  | -11.02 | -13.05 | -14.01 | -13.79 | -13.22 | -15.72 | -15.14 | 15.50 |
| CH <sub>2</sub> Cl <sub>2</sub>                 | -7.48  | -7.38  | -7.26  | -7.58  | -7.54  | -8.56  | -10.18 | -11.58 | -11.29 | -10.72 | -12.33 | -11.87 | 11.40 |
| CCl <sub>3</sub> H                              | -7.55  | -7.42  | -7.26  | -7.66  | -7.65  | -8.56  | -10.21 | -11.60 | -11.29 | -10.71 | -12.38 | -11.93 | 11.50 |
| CH <sub>3</sub> NO <sub>2</sub>                 | -7.11  | -6.92  | -6.86  | -7.21  | -7.07  | -8.50  | -10.63 | -11.53 | -11.30 | -10.73 | -12.86 | -12.26 | 11.29 |
| CH <sub>3</sub> SiH <sub>3</sub>                | -8.01  | -7.92  | -7.79  | -8.12  | -8.07  | -9.00  | -10.37 | -11.94 | -11.67 | -11.13 | -12.45 | -12.02 | 11.60 |

|                                    |        |        |        |        |        |        |        |        |        |        |        |        |       |
|------------------------------------|--------|--------|--------|--------|--------|--------|--------|--------|--------|--------|--------|--------|-------|
| HCOOH                              | -6.92  | -6.73  | -6.68  | -6.96  | -6.84  | -8.17  | -10.13 | -11.16 | -10.92 | -10.36 | -12.52 | -11.92 | 11.50 |
| CH <sub>3</sub> CONH <sub>2</sub>  | -5.95  | -5.79  | -5.72  | -6.03  | -5.93  | -7.18  | -9.09  | -10.15 | -9.91  | -9.35  | -11.28 | -10.71 | 10.00 |
| cylNHC <sub>2</sub> H <sub>4</sub> | -5.88  | -5.78  | -5.67  | -6.03  | -5.83  | -6.97  | -8.63  | -9.94  | -9.67  | -9.12  | -11.01 | -10.40 | 9.85  |
| NCCN                               | -9.64  | -9.39  | -9.23  | -9.57  | -9.40  | -10.44 | -12.01 | -13.34 | -13.07 | -12.54 | -14.91 | -14.32 | 13.51 |
| CH <sub>3</sub> NHCH <sub>3</sub>  | -5.13  | -5.06  | -4.98  | -5.32  | -5.14  | -6.27  | -7.91  | -9.20  | -8.93  | -8.39  | -10.22 | -9.61  | 8.95  |
| CH <sub>2</sub> CO                 | -6.09  | -5.91  | -5.79  | -6.08  | -5.91  | -6.94  | -8.39  | -9.72  | -9.50  | -9.01  | -11.29 | -10.66 | 9.64  |
| cylOC <sub>2</sub> H <sub>4</sub>  | -6.39  | -6.27  | -6.20  | -6.56  | -6.34  | -7.71  | -9.71  | -10.70 | -10.46 | -9.90  | -11.87 | -11.24 | 10.57 |
| OCHCHO                             | -6.53  | -6.39  | -6.35  | -6.64  | -6.54  | -7.77  | -9.51  | -10.62 | -10.41 | -9.88  | -11.98 | -11.45 | 10.60 |
| CH <sub>3</sub> CH <sub>2</sub> OH | -6.27  | -6.15  | -6.11  | -6.42  | -6.28  | -7.60  | -9.50  | -10.62 | -10.37 | -9.79  | -11.69 | -11.08 | 10.64 |
| CH <sub>3</sub> OCH <sub>3</sub>   | -5.93  | -5.83  | -5.77  | -6.11  | -5.92  | -7.20  | -9.05  | -10.14 | -9.90  | -9.36  | -11.28 | -10.67 | 10.10 |
| cylSC <sub>2</sub> H <sub>4</sub>  | -5.46  | -5.37  | -5.22  | -5.47  | -5.42  | -6.36  | -7.82  | -9.26  | -8.98  | -8.46  | -10.03 | -9.53  | 9.05  |
| CH <sub>3</sub> SOCH <sub>3</sub>  | -5.52  | -5.38  | -5.29  | -5.49  | -5.48  | -6.51  | -8.06  | -9.29  | -9.07  | -8.58  | -10.59 | -10.04 | 9.10  |
| CH <sub>2</sub> CHF                | -6.72  | -6.52  | -6.40  | -6.71  | -6.56  | -7.55  | -9.07  | -10.43 | -10.18 | -9.66  | -12.02 | -11.34 | 10.63 |
| CH <sub>3</sub> CH <sub>2</sub> Cl | -7.07  | -6.97  | -6.85  | -7.21  | -7.11  | -8.13  | -9.74  | -11.16 | -10.86 | -10.29 | -11.88 | -11.39 | 11.06 |
| CH <sub>2</sub> CHCl               | -6.59  | -6.42  | -6.27  | -6.56  | -6.47  | -7.35  | -8.79  | -10.18 | -9.92  | -9.42  | -11.50 | -10.91 | 10.20 |
| CH <sub>3</sub> CClO               | -7.29  | -7.13  | -7.02  | -7.39  | -7.27  | -8.40  | -10.14 | -11.27 | -11.04 | -10.52 | -12.51 | -12.01 | 11.03 |
| prplCl                             | -7.04  | -6.94  | -6.82  | -7.18  | -7.11  | -8.09  | -9.69  | -11.12 | -10.82 | -10.25 | -11.82 | -11.34 | 10.88 |
| NC <sub>3</sub> H <sub>9</sub>     | -4.92  | -4.85  | -4.77  | -5.07  | -4.97  | -6.00  | -7.56  | -8.83  | -8.59  | -8.07  | -9.92  | -9.32  | 8.54  |
| cylOC <sub>4</sub> H <sub>4</sub>  | -5.88  | -5.67  | -5.52  | -5.77  | -5.63  | -6.50  | -7.83  | -9.20  | -8.97  | -8.51  | -10.91 | -10.23 | 8.90  |
| cylNHC <sub>4</sub> H <sub>4</sub> | -5.33  | -5.13  | -4.97  | -5.22  | -5.08  | -5.92  | -7.25  | -8.58  | -8.36  | -7.92  | -10.26 | -9.58  | 8.23  |
| NO <sub>2</sub>                    | -6.60  | -6.50  | -6.48  | -6.68  | -6.62  | -8.18  | -10.15 | -11.16 | -10.95 | -10.37 | -12.58 | -12.09 | 11.23 |
| SF <sub>6</sub>                    | -10.40 | -10.14 | -10.11 | -10.66 | -10.52 | -12.10 | -14.71 | -15.12 | -14.96 | -14.41 | -17.28 | -16.58 | 15.70 |
| CFCl <sub>3</sub>                  | -7.88  | -7.75  | -7.60  | -7.99  | -8.01  | -8.92  | -10.59 | -11.97 | -11.66 | -11.08 | -12.82 | -12.38 | 11.76 |
| CClF <sub>3</sub>                  | -8.73  | -8.56  | -8.44  | -8.84  | -8.80  | -9.86  | -11.63 | -12.97 | -12.67 | -12.06 | -14.04 | -13.55 | 13.08 |
| CBrF <sub>3</sub>                  | -8.00  | -7.82  | -7.68  | -8.03  | -8.00  | -8.97  | -10.56 | -11.88 | -11.64 | -11.12 | -13.06 | -12.53 | 12.08 |
| HCCF                               | -7.22  | -7.02  | -6.88  | -7.22  | -7.03  | -8.12  | -9.72  | -11.09 | -10.82 | -10.28 | -12.48 | -11.86 | 11.50 |
| HCCCN                              | -8.08  | -7.87  | -7.70  | -8.03  | -7.84  | -8.81  | -10.28 | -11.62 | -11.36 | -10.87 | -13.12 | -12.52 | 11.75 |
| NCCCCN                             | -8.68  | -8.44  | -8.26  | -8.59  | -8.40  | -9.36  | -10.80 | -12.08 | -11.83 | -11.36 | -13.81 | -13.24 | 11.84 |
| C <sub>2</sub> N <sub>2</sub>      | -9.64  | -9.39  | -9.23  | -9.57  | -9.40  | -10.44 | -12.01 | -13.34 | -13.07 | -12.54 | -14.91 | -14.32 | 13.51 |
| C <sub>3</sub> O <sub>2</sub>      | -7.50  | -7.27  | -7.13  | -7.44  | -7.25  | -8.25  | -9.66  | -10.81 | -10.63 | -10.22 | -12.96 | -12.36 | 10.80 |
| FCN                                | -8.97  | -8.73  | -8.61  | -8.97  | -8.78  | -9.98  | -11.71 | -13.02 | -12.74 | -12.17 | -14.61 | -13.99 | 13.65 |
| HCCCCH                             | -6.84  | -6.64  | -6.47  | -6.77  | -6.60  | -7.51  | -8.91  | -10.24 | -10.00 | -9.52  | -11.69 | -11.09 | 10.30 |
| H <sub>2</sub> CS                  | -5.61  | -5.53  | -5.39  | -5.62  | -5.59  | -6.53  | -7.97  | -9.40  | -9.14  | -8.62  | -10.14 | -9.68  | 9.38  |
| HCONH <sub>2</sub>                 | -6.17  | -6.02  | -5.96  | -6.26  | -6.13  | -7.42  | -9.35  | -10.39 | -10.15 | -9.59  | -11.60 | -11.00 | 10.40 |
| CH <sub>2</sub> CHCHO              | -6.15  | -6.00  | -5.94  | -6.29  | -6.14  | -7.41  | -9.31  | -10.37 | -10.14 | -9.59  | -11.43 | -10.87 | 10.10 |
| CH <sub>2</sub> CCl <sub>2</sub>   | -6.61  | -6.44  | -6.28  | -6.55  | -6.52  | -7.37  | -8.80  | -10.17 | -9.92  | -9.42  | -11.54 | -10.97 | 10.00 |
| CHFCF <sub>2</sub>                 | -6.45  | -6.22  | -6.15  | -6.42  | -6.30  | -7.42  | -8.99  | -10.24 | -10.02 | -9.52  | -12.36 | -11.70 | 10.62 |
| CH <sub>2</sub> CF <sub>2</sub>    | -6.78  | -6.57  | -6.46  | -6.76  | -6.63  | -7.67  | -9.22  | -10.54 | -10.30 | -9.78  | -12.33 | -11.66 | 10.70 |
| CH <sub>3</sub> F                  | -8.19  | -8.09  | -8.06  | -8.47  | -8.23  | -9.69  | -11.69 | -12.70 | -12.48 | -11.91 | -13.95 | -13.38 | 13.04 |
| CF <sub>2</sub> Cl <sub>2</sub>    | -8.23  | -8.08  | -7.94  | -8.33  | -8.34  | -9.29  | -10.97 | -12.35 | -12.04 | -11.45 | -13.31 | -12.86 | 12.24 |
| SiF <sub>2</sub>                   | -7.27  | -7.14  | -7.05  | -7.29  | -7.25  | -8.16  | -9.42  | -10.88 | -10.70 | -10.24 | -12.06 | -11.58 | 11.08 |
| MSE                                | -4.28  | -4.40  | -4.50  | -4.17  | -4.29  | -3.15  | -1.48  | -0.24  | -0.48  | -1.01  | 0.90   | 0.35   |       |
| MAE                                | 4.28   | 4.40   | 4.50   | 4.17   | 4.29   | 3.15   | 1.48   | 0.40   | 0.51   | 1.01   | 1.00   | 0.60   |       |
| rms                                | 4.39   | 4.50   | 4.60   | 4.26   | 4.39   | 3.22   | 1.56   | 0.63   | 0.75   | 1.18   | 1.12   | 0.72   |       |

TABLE IV:  $-\epsilon_{N+1}(N+1)$  (in eV) of the EA131 database.

| Molecule                        | LSDA | PBE  | BLYP  | M06L  | VS98  | B3LYP | M06-2X | $\omega$ B97 | $\omega$ B97X | $\omega$ B97X-D | LB94  | LB $\alpha$ | Ref.  |
|---------------------------------|------|------|-------|-------|-------|-------|--------|--------------|---------------|-----------------|-------|-------------|-------|
| H                               | 1.87 | 1.97 | 2.05  | 1.64  | 1.98  | 1.21  | 0.32   | -1.37        | -1.21         | -0.85           | -0.80 | -0.42       | 0.75  |
| He                              | 6.30 | 6.06 | 6.31  | 6.15  | 5.89  | 5.73  | 5.22   | 4.10         | 4.15          | 4.26            | 4.25  | 4.26        | -2.63 |
| Li                              | 0.82 | 0.88 | 1.00  | 0.96  | 0.95  | 0.58  | 0.16   | -0.69        | -0.73         | -0.70           | -0.51 | -0.34       | 0.62  |
| Be                              | 1.92 | 1.89 | 2.08  | 1.97  | 2.04  | 1.63  | 1.27   | 0.44         | 0.34          | 0.40            | 0.22  | 0.46        | -0.36 |
| B                               | 2.08 | 2.14 | 2.32  | 2.20  | 2.33  | 1.60  | 0.77   | -0.45        | -0.42         | -0.15           | -0.42 | -0.10       | 0.25  |
| C                               | 1.95 | 2.06 | 2.26  | 2.25  | 2.21  | 1.27  | 0.10   | -1.28        | -1.16         | -0.74           | -1.33 | -0.94       | 1.25  |
| N                               | 3.53 | 3.49 | 3.51  | 3.53  | 3.79  | 2.57  | 1.59   | -0.11        | 0.12          | 0.62            | -0.75 | 0.11        | -0.22 |
| O                               | 2.80 | 2.91 | 2.92  | 2.94  | 3.03  | 1.64  | 0.02   | -1.44        | -1.16         | -0.55           | -2.10 | -1.30       | 1.45  |
| F                               | 1.74 | 1.96 | 1.96  | 1.89  | 1.86  | 0.35  | -1.70  | -2.87        | -2.59         | -1.94           | -3.71 | -3.01       | 3.44  |
| Ne                              | 9.80 | 9.77 | 10.00 | 10.12 | 10.14 | 9.28  | 7.98   | 7.28         | 7.29          | 7.53            | 6.35  | 6.77        | -5.31 |
| Na                              | 0.80 | 0.85 | 0.98  | 0.92  | 0.89  | 0.56  | 0.13   | -0.67        | -0.71         | -0.67           | -0.60 | -0.39       | 0.54  |
| Mg                              | 1.42 | 1.38 | 1.55  | 1.50  | 1.49  | 1.23  | 1.04   | 0.42         | 0.35          | 0.31            | 0.19  | 0.36        | -0.23 |
| Al                              | 1.54 | 1.58 | 1.78  | 1.61  | 1.73  | 1.21  | 0.58   | -0.48        | -0.47         | -0.31           | -0.42 | -0.18       | 0.45  |
| Si                              | 1.19 | 1.26 | 1.50  | 1.31  | 1.35  | 0.74  | -0.11  | -1.46        | -1.35         | -1.07           | -1.33 | -1.05       | 1.42  |
| P                               | 1.83 | 1.90 | 1.95  | 1.96  | 2.07  | 1.20  | 0.37   | -1.01        | -0.92         | -0.63           | -1.52 | -0.90       | 0.74  |
| S                               | 1.09 | 1.20 | 1.28  | 1.14  | 1.24  | 0.33  | -0.85  | -2.34        | -2.15         | -1.71           | -2.61 | -2.06       | 2.10  |
| Cl                              | 0.16 | 0.31 | 0.41  | 0.05  | 0.25  | -0.74 | -2.21  | -3.73        | -3.46         | -2.92           | -3.92 | -3.43       | 3.69  |
| Ar                              | 5.11 | 5.19 | 5.39  | 5.54  | 5.71  | 4.84  | 3.92   | 3.59         | 3.46          | 3.48            | 2.48  | 2.85        | -2.81 |
| CH <sub>3</sub>                 | 2.65 | 2.78 | 2.88  | 2.66  | 2.85  | 2.08  | 1.06   | -0.36        | -0.20         | 0.17            | -0.72 | -0.19       | -0.07 |
| CH <sub>4</sub>                 | 2.00 | 1.97 | 2.16  | 2.17  | 1.99  | 1.81  | 1.50   | 1.05         | 0.99          | 0.92            | 0.43  | 0.67        | -0.62 |
| NH                              | 3.06 | 3.16 | 3.21  | 3.18  | 3.30  | 2.20  | 0.94   | -0.60        | -0.37         | 0.14            | -1.11 | -0.39       | 0.33  |
| NH <sub>2</sub>                 | 2.66 | 2.84 | 2.91  | 2.76  | 2.86  | 1.85  | 0.46   | -1.03        | -0.78         | -0.27           | -1.37 | -0.78       | 0.74  |
| NH <sub>3</sub>                 | 2.19 | 2.18 | 2.39  | 2.27  | 2.18  | 1.98  | 1.57   | 1.02         | 0.97          | 0.90            | 0.41  | 0.68        | -0.56 |
| OH                              | 2.36 | 2.56 | 2.60  | 2.49  | 2.53  | 1.27  | -0.46  | -1.84        | -1.56         | -0.96           | -2.27 | -1.64       | 1.83  |
| H <sub>2</sub> O                | 2.45 | 2.44 | 2.66  | 2.54  | 2.43  | 2.18  | 1.76   | 1.02         | 0.97          | 0.94            | 0.51  | 0.78        | -0.56 |
| HF                              | 2.67 | 2.65 | 2.87  | 2.78  | 2.58  | 2.36  | 1.94   | 1.04         | 1.00          | 1.00            | 0.72  | 0.99        | -0.63 |
| SiH <sub>3</sub>                | 1.49 | 1.61 | 1.72  | 1.62  | 1.62  | 1.01  | 0.14   | -1.18        | -1.09         | -0.81           | -1.61 | -1.18       | 0.93  |
| SiH <sub>4</sub>                | 2.03 | 2.02 | 2.20  | 2.28  | 2.03  | 1.88  | 1.52   | 1.20         | 1.13          | 1.05            | 0.19  | 0.50        | -1.11 |
| PH <sub>3</sub>                 | 1.95 | 1.95 | 2.15  | 2.05  | 1.99  | 1.79  | 1.37   | 1.04         | 0.97          | 0.88            | 0.16  | 0.45        | -1.21 |
| SH <sub>2</sub>                 | 2.04 | 2.05 | 2.25  | 2.13  | 2.06  | 1.85  | 1.42   | 0.95         | 0.88          | 0.82            | 0.18  | 0.48        | -0.49 |
| HCl                             | 2.33 | 2.37 | 2.54  | 2.39  | 2.46  | 2.08  | 1.55   | 0.91         | 0.85          | 0.85            | 0.30  | 0.62        | -0.52 |
| HCCH                            | 1.85 | 1.81 | 1.98  | 2.03  | 1.81  | 1.68  | 1.48   | 1.18         | 1.13          | 1.04            | 1.36  | 1.79        | -1.90 |
| CH <sub>2</sub> CH <sub>2</sub> | 2.08 | 2.05 | 2.25  | 2.27  | 1.99  | 1.91  | 1.58   | 1.22         | 1.17          | 1.09            | 0.45  | 1.23        | -1.86 |
| CH <sub>3</sub> CH <sub>3</sub> | 1.89 | 1.89 | 2.06  | 2.19  | 1.84  | 1.74  | 1.44   | 1.09         | 1.03          | 0.95            | 0.18  | 0.47        | -0.62 |
| HCN                             | 2.33 | 3.59 | 2.51  | 2.65  | 2.20  | 2.07  | 1.66   | 0.81         | 0.77          | 0.79            | 1.14  | 1.54        | -0.48 |
| CO                              | 3.80 | 3.73 | 3.91  | 3.88  | 3.92  | 3.34  | 2.72   | 1.94         | 1.89          | 1.93            | 0.99  | 1.41        | -1.50 |
| HCO                             | 2.87 | 2.94 | 2.97  | 2.77  | 3.02  | 2.21  | 1.11   | -0.22        | -0.06         | 0.33            | -0.86 | -0.35       | 0.02  |
| CH <sub>2</sub> O               | 2.59 | 2.45 | 2.64  | 2.67  | 2.13  | 1.93  | 2.11   | 1.02         | 1.12          | 1.40            | 0.01  | 0.51        | -0.55 |
| CH <sub>3</sub> OH              | 1.91 | 1.89 | 2.07  | 2.13  | 1.88  | 1.72  | 1.47   | 0.94         | 0.90          | 0.84            | 0.20  | 0.48        | -0.55 |
| N <sub>2</sub>                  | 5.41 | 5.45 | 5.50  | 5.54  | 5.77  | 4.67  | 3.65   | 2.35         | 2.50          | 2.88            | 1.40  | 1.90        | -2.24 |
| NH <sub>2</sub> NH <sub>2</sub> | 2.07 | 2.11 | 2.29  | 2.42  | 2.02  | 1.88  | 1.47   | 0.89         | 0.84          | 0.81            | 0.08  | 0.39        | -0.45 |
| NO                              | 4.19 | 4.30 | 4.35  | 4.40  | 4.42  | 3.17  | 1.69   | 0.40         | 0.61          | 1.12            | -0.37 | 0.11        | -0.42 |
| O <sub>2</sub>                  | 4.45 | 4.58 | 4.56  | 4.73  | 4.71  | 3.21  | 1.51   | 0.26         | 0.50          | 1.08            | -0.89 | -0.18       | -0.08 |
| HOOH                            | 2.38 | 2.40 | 2.59  | 2.58  | 2.34  | 2.16  | 1.76   | 1.17         | 1.11          | 1.06            | 0.48  | 0.87        | -0.92 |

|                                                 |      |      |      |      |      |      |       |       |       |       |       |       |       |
|-------------------------------------------------|------|------|------|------|------|------|-------|-------|-------|-------|-------|-------|-------|
| F <sub>2</sub>                                  | 4.32 | 4.43 | 4.43 | 4.42 | 4.29 | 2.88 | 0.83  | -0.01 | 0.17  | 0.73  | -1.35 | -0.86 | 0.42  |
| CO <sub>2</sub>                                 | 2.57 | 2.60 | 2.78 | 2.77 | 2.64 | 2.33 | 1.88  | 1.28  | 1.22  | 1.19  | 2.20  | 2.56  | -0.65 |
| P <sub>2</sub>                                  | 2.11 | 2.13 | 2.28 | 2.24 | 2.22 | 1.48 | 0.61  | -0.89 | -0.72 | -0.35 | -1.17 | -0.84 | 0.48  |
| S <sub>2</sub>                                  | 1.57 | 1.67 | 1.77 | 1.76 | 1.73 | 0.83 | -0.32 | -1.72 | -1.54 | -1.12 | -2.38 | -1.89 | 1.53  |
| Cl <sub>2</sub>                                 | 2.11 | 2.20 | 2.30 | 2.35 | 2.32 | 1.48 | 0.46  | -0.86 | -0.68 | -0.28 | -1.78 | -1.43 | 0.75  |
| NaCl                                            | 0.80 | 0.83 | 0.96 | 0.80 | 0.90 | 0.53 | 0.14  | -0.62 | -0.65 | -0.65 | -0.87 | -0.63 | 0.65  |
| SiO                                             | 2.35 | 2.35 | 2.51 | 2.48 | 2.54 | 1.86 | 1.18  | -0.07 | 0.01  | 0.25  | -0.39 | -0.08 | 0.03  |
| CS                                              | 2.96 | 3.00 | 3.10 | 3.22 | 3.13 | 2.20 | 1.22  | -0.26 | -0.11 | 0.32  | -0.70 | -0.31 | -0.09 |
| ClO                                             | 1.79 | 1.97 | 2.03 | 1.87 | 1.97 | 0.73 | -0.95 | -2.18 | -1.95 | -1.41 | -3.03 | -2.46 | 2.19  |
| ClF                                             | 2.86 | 2.95 | 3.03 | 3.22 | 3.04 | 2.09 | 0.96  | -0.41 | -0.22 | 0.23  | -1.37 | -0.97 | 0.44  |
| SiH <sub>3</sub> SiH <sub>3</sub>               | 1.96 | 1.95 | 2.12 | 2.12 | 2.05 | 1.75 | 1.69  | 1.14  | 1.07  | 1.00  | -0.23 | 0.14  | -0.69 |
| CH <sub>3</sub> Cl                              | 1.95 | 1.96 | 2.15 | 2.16 | 1.94 | 1.76 | 1.38  | 0.87  | 0.81  | 0.76  | 0.06  | 0.39  | -0.51 |
| CH <sub>3</sub> SH                              | 1.88 | 1.90 | 2.08 | 2.19 | 1.81 | 1.72 | 1.30  | 0.93  | 0.86  | 0.80  | -0.04 | 0.30  | -0.50 |
| SO <sub>2</sub>                                 | 2.72 | 2.78 | 2.86 | 2.92 | 2.80 | 1.71 | 0.42  | -1.01 | -0.80 | -0.29 | -1.89 | -1.47 | 0.81  |
| BF <sub>3</sub>                                 | 2.38 | 2.44 | 2.60 | 2.76 | 2.24 | 2.18 | 1.69  | 1.31  | 1.24  | 1.18  | 1.04  | 0.50  | -1.04 |
| BCl <sub>3</sub>                                | 2.95 | 2.99 | 3.15 | 3.05 | 3.02 | 2.21 | 1.18  | 1.15  | 1.06  | 0.99  | -1.35 | -0.90 | -0.17 |
| AlCl <sub>3</sub>                               | 1.51 | 1.61 | 1.75 | 2.08 | 1.82 | 1.28 | 0.72  | 0.13  | 0.07  | 0.12  | -1.58 | -1.21 | 0.06  |
| CF <sub>4</sub>                                 | 2.92 | 2.98 | 3.13 | 3.51 | 2.95 | 2.75 | 2.27  | 1.96  | 1.90  | 1.83  | 0.60  | 0.95  | -1.33 |
| CCl <sub>4</sub>                                | 2.04 | 2.11 | 2.17 | 2.39 | 2.22 | 1.67 | 1.06  | 0.14  | 0.19  | 0.35  | -2.12 | -1.72 | -0.46 |
| OCS                                             | 2.44 | 2.47 | 2.61 | 3.24 | 2.34 | 2.13 | 1.57  | 1.38  | 1.29  | 1.22  | 0.14  | 0.58  | -0.74 |
| CS <sub>2</sub>                                 | 2.56 | 2.59 | 2.68 | 2.86 | 2.73 | 1.88 | 0.95  | -0.45 | -0.30 | 0.10  | -1.17 | -0.77 | 0.01  |
| CF <sub>2</sub> O                               | 2.69 | 2.74 | 2.90 | 3.10 | 2.73 | 2.47 | 1.99  | 1.51  | 1.44  | 1.40  | 0.78  | 1.32  | -2.37 |
| SiF <sub>4</sub>                                | 2.34 | 2.48 | 2.59 | 2.92 | 2.42 | 2.17 | 1.60  | 1.36  | 1.27  | 1.23  | -0.49 | -0.07 | -0.81 |
| N <sub>2</sub> O                                | 3.24 | 3.27 | 3.46 | 3.31 | 3.42 | 3.01 | 2.40  | 1.89  | 1.82  | 1.79  | 1.00  | 1.53  | -2.01 |
| NF <sub>3</sub>                                 | 4.37 | 4.45 | 4.56 | 4.86 | 4.38 | 4.03 | 3.06  | 2.88  | 2.81  | 2.84  | 1.03  | 1.55  | -2.06 |
| PF <sub>3</sub>                                 | 2.66 | 2.59 | 2.75 | 2.84 | 2.60 | 2.39 | 2.12  | 1.60  | 1.54  | 1.49  | 0.52  | 0.85  | -1.23 |
| O <sub>3</sub>                                  | 2.16 | 2.29 | 2.29 | 2.23 | 2.15 | 0.65 | -1.35 | -2.39 | -2.16 | -1.56 | -3.45 | -2.89 | 1.93  |
| F <sub>2</sub> O                                | 4.42 | 4.52 | 4.50 | 4.61 | 4.43 | 3.18 | 1.65  | 0.44  | 0.63  | 1.16  | -1.20 | -0.73 | -0.31 |
| ClF <sub>3</sub>                                | 2.51 | 2.61 | 2.66 | 2.73 | 2.55 | 1.48 | 0.07  | -1.25 | -1.02 | -0.51 | -2.67 | -2.25 | 1.20  |
| CF <sub>2</sub> CF <sub>2</sub>                 | 2.57 | 2.65 | 2.79 | 3.12 | 2.47 | 2.40 | 1.98  | 1.67  | 1.60  | 1.54  | 1.19  | 0.38  | -1.65 |
| CF <sub>3</sub> CN                              | 3.47 | 2.71 | 2.82 | 3.34 | 2.23 | 2.26 | 1.85  | 1.49  | 1.45  | 1.39  | 0.08  | 0.11  | -0.96 |
| CH <sub>3</sub> CCH                             | 1.68 | 1.66 | 1.84 | 1.95 | 1.56 | 1.54 | 1.32  | 0.94  | 0.89  | 0.82  | 0.06  | 0.34  | -1.13 |
| CH <sub>2</sub> CCH <sub>2</sub>                | 1.83 | 1.82 | 2.00 | 2.18 | 1.76 | 1.70 | 1.41  | 1.10  | 1.06  | 0.98  | 0.31  | 0.39  | -0.56 |
| cylC <sub>3</sub> H <sub>4</sub>                | 1.89 | 1.88 | 2.05 | 2.22 | 1.82 | 1.75 | 1.53  | 1.12  | 1.07  | 1.00  | 0.57  | 1.09  | -1.82 |
| cylC <sub>3</sub> H <sub>6</sub>                | 1.98 | 1.97 | 2.16 | 2.32 | 1.87 | 1.84 | 1.54  | 1.22  | 1.17  | 1.09  | 0.22  | 0.50  | -0.65 |
| CH <sub>3</sub> CH <sub>2</sub> CH <sub>3</sub> | 1.76 | 1.77 | 1.93 | 2.09 | 1.68 | 1.63 | 1.36  | 1.10  | 1.04  | 0.96  | -0.05 | 0.26  | -0.60 |
| CH <sub>3</sub> CCCH <sub>3</sub>               | 1.59 | 1.61 | 1.77 | 1.98 | 1.52 | 1.49 | 1.30  | 1.01  | 0.97  | 0.89  | -0.32 | 0.01  | -0.67 |
| cylC <sub>4</sub> H <sub>6</sub>                | 1.80 | 1.81 | 1.97 | 2.31 | 1.71 | 1.68 | 1.41  | 1.14  | 1.08  | 1.01  | 0.04  | 0.34  | -1.41 |
| isobutane                                       | 1.66 | 1.69 | 1.85 | 2.05 | 1.58 | 1.55 | 1.30  | 1.04  | 0.99  | 0.91  | -0.26 | 0.08  | -0.56 |
| benzene                                         | 3.70 | 1.60 | 1.75 | 2.00 | 1.50 | 1.48 | 1.32  | 1.08  | 1.03  | 0.94  | -0.58 | -0.06 | -0.71 |
| CH <sub>2</sub> F <sub>2</sub>                  | 2.12 | 2.09 | 2.26 | 2.30 | 2.13 | 1.89 | 1.71  | 1.00  | 0.95  | 0.91  | 0.33  | 0.58  | -0.58 |
| CF <sub>3</sub> H                               | 2.43 | 2.43 | 2.58 | 2.97 | 2.36 | 2.19 | 1.90  | 1.02  | 0.99  | 1.01  | 0.40  | 0.66  | -0.60 |
| CH <sub>2</sub> Cl <sub>2</sub>                 | 2.05 | 2.07 | 2.26 | 2.24 | 2.08 | 1.83 | 1.41  | 0.84  | 0.78  | 0.74  | -0.42 | -0.02 | -0.49 |
| CCL <sub>3</sub> H                              | 2.21 | 2.25 | 2.40 | 2.42 | 2.33 | 1.95 | 1.47  | 0.82  | 0.75  | 0.74  | -1.18 | -0.75 | -0.83 |
| CH <sub>3</sub> NO <sub>2</sub>                 | 2.13 | 2.09 | 2.25 | 2.42 | 2.01 | 2.12 | 1.23  | 0.01  | 0.21  | 0.66  | -1.34 | -0.77 | -0.37 |
| CH <sub>3</sub> SiH <sub>3</sub>                | 1.86 | 1.88 | 2.06 | 2.19 | 1.76 | 1.71 | 1.35  | 0.97  | 0.91  | 0.84  | -0.03 | 0.31  | -0.53 |

|                                                  |       |       |       |       |       |       |       |       |       |       |       |       |       |
|--------------------------------------------------|-------|-------|-------|-------|-------|-------|-------|-------|-------|-------|-------|-------|-------|
| HCOOH                                            | 2.11  | 2.06  | 2.23  | 2.24  | 2.07  | 2.39  | 1.84  | 1.02  | 0.98  | 2.17  | 0.82  | 1.33  | -0.57 |
| CH <sub>3</sub> CONH <sub>2</sub>                | 1.64  | 1.66  | 1.83  | 1.98  | 1.59  | 1.48  | 1.21  | 0.66  | 0.60  | 0.55  | -0.38 | -0.04 | -0.31 |
| cyINH <sub>2</sub> C <sub>2</sub> H <sub>4</sub> | 1.92  | 1.90  | 2.07  | 2.26  | 1.83  | 1.75  | 1.53  | 0.97  | 0.92  | 0.87  | 0.17  | 0.45  | -0.56 |
| NCCN                                             | 3.03  | 3.15  | 3.26  | 3.23  | 3.26  | 2.28  | 1.21  | 1.25  | 1.17  | 0.39  | -1.63 | -1.13 | -0.19 |
| CH <sub>3</sub> NHCH <sub>3</sub>                | 1.72  | 1.71  | 1.89  | 2.02  | 1.65  | 1.59  | 1.36  | 0.98  | 0.93  | 0.86  | -0.04 | 0.26  | -0.56 |
| CH <sub>2</sub> CO                               | 2.02  | 2.45  | 2.60  | 2.59  | 1.96  | 1.83  | 1.53  | 1.00  | 0.94  | 0.88  | 0.03  | 0.48  | -0.51 |
| cyIOC <sub>2</sub> H <sub>4</sub>                | 1.97  | 1.94  | 2.12  | 2.16  | 1.92  | 1.79  | 1.58  | 1.06  | 1.01  | 0.95  | 0.23  | 0.49  | -0.86 |
| OCHCHO                                           | 2.10  | 2.24  | 2.35  | 2.33  | 2.27  | 1.39  | 0.26  | -1.05 | -0.90 | -0.50 | -2.82 | -2.23 | 0.69  |
| CH <sub>3</sub> CH <sub>2</sub> OH               | 1.81  | 1.82  | 1.97  | 2.15  | 1.73  | 1.65  | 1.38  | 0.92  | 0.87  | 0.81  | -0.09 | 0.23  | -0.53 |
| CH <sub>3</sub> OCH <sub>3</sub>                 | 1.78  | 1.77  | 1.93  | 2.05  | 1.74  | 1.63  | 1.42  | 1.02  | 0.97  | 0.90  | 0.02  | 0.31  | -0.58 |
| cyISC <sub>2</sub> H <sub>4</sub>                | 1.95  | 1.93  | 2.13  | 2.16  | 1.81  | 1.78  | 1.47  | 1.03  | 0.98  | 0.91  | 0.09  | 0.46  | -0.78 |
| CH <sub>3</sub> SOCH <sub>3</sub>                | 1.65  | 1.67  | 1.82  | 2.03  | 1.58  | 1.50  | 1.20  | 0.77  | 0.71  | 0.68  | -0.15 | 0.12  | -0.40 |
| CH <sub>2</sub> CHF                              | 2.06  | 2.03  | 2.21  | 2.48  | 1.97  | 1.88  | 1.61  | 1.08  | 1.03  | 0.99  | 0.71  | 1.21  | -0.88 |
| CH <sub>3</sub> CH <sub>2</sub> Cl               | 1.84  | 1.86  | 2.03  | 2.27  | 1.75  | 1.68  | 1.32  | 0.91  | 0.86  | 0.80  | -0.02 | 0.32  | -0.51 |
| CH <sub>2</sub> CHCl                             | 1.91  | 1.91  | 2.09  | 2.32  | 1.81  | 1.76  | 1.42  | 1.00  | 0.94  | 0.90  | 0.09  | 0.61  | -1.11 |
| CH <sub>3</sub> CClO                             | 2.00  | 1.99  | 2.15  | 2.47  | 1.88  | 1.61  | 1.26  | 0.79  | 0.73  | 0.68  | -0.72 | -0.20 | -0.85 |
| prplCl                                           | 1.70  | 1.73  | 1.90  | 1.99  | 1.61  | 1.56  | 1.24  | 0.88  | 0.83  | 0.76  | -0.51 | -0.12 | -0.48 |
| NC <sub>3</sub> H <sub>9</sub>                   | 1.62  | 1.64  | 1.81  | 2.01  | 1.59  | 1.52  | 1.30  | 1.00  | 0.95  | 0.88  | -0.27 | 0.06  | -0.54 |
| cyIOC <sub>4</sub> H <sub>4</sub>                | 1.69  | 1.68  | 1.84  | 3.99  | 1.65  | 1.56  | 1.38  | 1.03  | 0.98  | 0.91  | -0.05 | 0.24  | -0.74 |
| cyINH <sub>2</sub> C <sub>4</sub> H <sub>4</sub> | 1.67  | 1.70  | 1.83  | 2.07  | 1.59  | 1.54  | 1.32  | 0.78  | 0.72  | 0.69  | -0.22 | 0.09  | -0.51 |
| NO <sub>2</sub>                                  | 2.25  | 2.44  | 2.43  | 2.79  | 2.44  | 1.29  | -0.24 | -1.51 | -1.31 | -0.77 | -2.50 | -1.95 | 1.44  |
| SF <sub>6</sub>                                  | 2.71  | 2.85  | 2.88  | 4.00  | 2.72  | 2.38  | 1.99  | 1.03  | 1.10  | 1.29  | -1.96 | -1.56 | -1.05 |
| CFCl <sub>3</sub>                                | 2.38  | 2.43  | 2.49  | 2.84  | 2.69  | 2.01  | 1.45  | 0.50  | 0.55  | 0.73  | -1.56 | -1.17 | -0.68 |
| CClF <sub>3</sub>                                | 2.71  | 2.76  | 2.90  | 3.65  | 2.50  | 2.52  | 2.04  | 1.60  | 1.54  | 1.56  | 0.26  | 0.59  | -1.06 |
| CBrF <sub>3</sub>                                | 2.73  | 2.73  | 2.86  | 3.33  | 2.87  | 2.51  | 2.07  | 1.11  | 1.13  | 1.27  | -0.36 | 0.03  | -0.81 |
| HCCF                                             | 1.90  | 1.91  | 2.07  | 2.32  | 1.83  | 1.73  | 1.46  | 0.90  | 0.86  | 0.82  | 0.16  | 0.46  | -0.55 |
| HCCCN                                            | 2.94  | 3.01  | 2.12  | 2.07  | 1.66  | 2.43  | 1.25  | 0.57  | 0.49  | 0.49  | -1.12 | -0.62 | -0.36 |
| NCCCCN                                           | 1.60  | 1.75  | 1.90  | 1.79  | 1.87  | 1.04  | 0.10  | -1.20 | -1.06 | -0.72 | -3.11 | -2.60 | 0.68  |
| C <sub>2</sub> N <sub>2</sub>                    | 3.03  | 3.15  | 3.26  | 3.23  | 3.26  | 2.28  | 1.21  | 1.25  | 1.17  | 0.39  | -1.63 | -1.13 | -0.19 |
| C <sub>3</sub> O <sub>2</sub>                    | 3.92  | 3.04  | 3.04  | 4.13  | 4.15  | 3.04  | 1.59  | 1.40  | 1.31  | 1.23  | -1.14 | -0.64 | -0.74 |
| FCN                                              | 2.45  | 2.50  | 2.67  | 2.61  | 2.59  | 2.18  | 1.64  | 0.99  | 0.93  | 0.93  | -0.02 | 0.36  | -0.66 |
| HCCCCH                                           | 3.11  | 1.68  | 1.83  | 2.24  | 1.47  | 1.43  | 1.36  | 1.03  | 0.98  | 0.90  | -0.60 | -0.10 | -0.64 |
| H <sub>2</sub> CS                                | 2.59  | 2.64  | 2.77  | 2.75  | 2.72  | 1.86  | 0.83  | -0.65 | -0.47 | -0.04 | -1.27 | -0.83 | 0.28  |
| HCONH <sub>2</sub>                               | 1.96  | 1.94  | 2.12  | 2.20  | 1.90  | 1.74  | 1.43  | 0.72  | 2.43  | 2.45  | 0.07  | 0.34  | -0.35 |
| CH <sub>2</sub> CHCHO                            | 2.77  | 2.88  | 3.00  | 3.02  | 2.98  | 2.18  | 1.19  | -0.15 | 0.01  | 0.38  | -1.80 | -1.21 | -0.46 |
| CH <sub>2</sub> CCl <sub>2</sub>                 | 2.05  | 1.96  | 2.10  | 2.53  | 1.92  | 1.77  | 1.46  | 0.99  | 0.93  | 0.89  | -0.53 | -0.01 | -1.07 |
| CHF <sub>2</sub> CF <sub>2</sub>                 | 2.17  | 2.22  | 2.35  | 2.76  | 2.09  | 1.99  | 1.70  | 1.03  | 0.99  | 0.98  | 0.61  | 0.90  | -0.54 |
| CH <sub>2</sub> CF <sub>2</sub>                  | 2.09  | 2.08  | 2.26  | 2.37  | 2.04  | 1.90  | 1.64  | 1.07  | 1.02  | 0.97  | 0.79  | 0.45  | -1.03 |
| CH <sub>3</sub> F                                | 2.02  | 1.99  | 2.17  | 2.14  | 2.01  | 1.81  | 1.60  | 0.98  | 0.93  | 0.87  | 0.41  | 0.61  | -0.58 |
| CF <sub>2</sub> Cl <sub>2</sub>                  | 2.63  | 2.64  | 2.76  | 3.03  | 3.04  | 2.34  | 1.90  | 1.19  | 1.21  | 1.29  | -0.75 | -0.36 | -0.90 |
| SiF <sub>2</sub>                                 | 2.35  | 2.36  | 2.51  | 2.54  | 2.52  | 1.85  | 1.11  | -0.19 | -0.09 | 0.19  | -0.56 | -0.27 | 0.10  |
| MSE                                              | -2.04 | -2.05 | -2.17 | -2.28 | -2.04 | -1.59 | -0.94 | -0.17 | -0.20 | -0.32 | 0.75  | 0.37  |       |
| MAE                                              | 2.04  | 2.05  | 2.17  | 2.28  | 2.04  | 1.60  | 0.96  | 0.36  | 0.35  | 0.41  | 0.83  | 0.55  |       |
| rms                                              | 2.29  | 2.32  | 2.41  | 2.49  | 2.34  | 1.76  | 1.03  | 0.46  | 0.47  | 0.55  | 1.02  | 0.75  |       |

TABLE V:  $-\epsilon_{N+1}(N)$  (in eV) of the EA131 database.

| Molecule                        | LSDA   | PBE   | BLYP  | M06L  | VS98  | B3LYP | M06-2X | $\omega$ B97 | $\omega$ B97X | $\omega$ B97X-D | LB94   | LB $\alpha$ | Ref.  |
|---------------------------------|--------|-------|-------|-------|-------|-------|--------|--------------|---------------|-----------------|--------|-------------|-------|
| H                               | -2.60  | 0.51  | -0.85 | 0.41  | 0.53  | -1.12 | 0.52   | 0.52         | 0.53          | 0.53            | -2.48  | -2.45       | 0.75  |
| He                              | 2.49   | 2.29  | 2.02  | 2.54  | 2.67  | 2.39  | 2.67   | 4.55         | 4.64          | 4.30            | -2.44  | -2.22       | -2.63 |
| Li                              | -2.03  | -1.34 | -1.57 | -1.14 | -1.58 | -1.48 | -0.26  | 0.28         | 0.27          | 0.20            | -7.79  | -7.57       | 0.62  |
| Be                              | -2.10  | -2.02 | -1.93 | -1.67 | -2.08 | -1.43 | -0.53  | 0.67         | 0.54          | 0.29            | -5.36  | -5.01       | -0.36 |
| B                               | -3.92  | -3.62 | -3.45 | -2.84 | -3.56 | -2.69 | -1.40  | 0.15         | -0.12         | -0.57           | -8.32  | -7.73       | 0.25  |
| C                               | -6.06  | -5.59 | -5.34 | -4.89 | -5.35 | -4.29 | -2.72  | -1.00        | -1.38         | -1.98           | -11.44 | -10.68      | 1.25  |
| N                               | -4.40  | -4.15 | -4.44 | -3.37 | -3.82 | -3.18 | -1.70  | 0.15         | -0.06         | -0.51           | -10.62 | -9.46       | -0.22 |
| O                               | -7.18  | -6.51 | -6.70 | -5.21 | -6.11 | -5.16 | -3.04  | -1.70        | -1.94         | -2.48           | -14.58 | -13.16      | 1.45  |
| F                               | -10.28 | -9.33 | -9.43 | -7.95 | -9.00 | -7.59 | -4.77  | -4.13        | -4.32         | -4.90           | -18.51 | -17.01      | 3.44  |
| Ne                              | 3.65   | 3.59  | 3.29  | 4.45  | 4.35  | 3.96  | 5.17   | 7.25         | 7.18          | 6.84            | -2.57  | -2.07       | -5.31 |
| Na                              | -2.17  | -1.45 | -1.92 | -0.72 | -1.12 | -1.70 | -0.16  | 0.29         | 0.29          | 0.24            | -7.45  | -7.24       | 0.54  |
| Mg                              | -1.38  | -1.34 | -1.20 | -0.95 | -1.44 | -0.92 | -0.33  | 0.59         | 0.54          | 0.38            | -4.17  | -3.85       | -0.23 |
| Al                              | -2.91  | -2.76 | -2.55 | -2.28 | -2.81 | -2.10 | -1.25  | 0.08         | -0.07         | -0.36           | -6.20  | -5.80       | 0.45  |
| Si                              | -4.59  | -4.37 | -4.11 | -4.02 | -4.30 | -3.51 | -2.38  | -0.87        | -1.11         | -1.55           | -8.36  | -7.90       | 1.42  |
| P                               | -4.13  | -3.73 | -3.95 | -3.38 | -3.74 | -3.26 | -2.39  | -0.55        | -0.84         | -1.21           | -9.37  | -8.35       | 0.74  |
| S                               | -6.11  | -5.64 | -5.73 | -5.21 | -5.76 | -4.89 | -3.51  | -2.01        | -2.34         | -2.79           | -11.59 | -10.61      | 2.10  |
| Cl                              | -8.30  | -7.75 | -7.77 | -7.38 | -7.70 | -6.79 | -5.10  | -3.65        | -4.03         | -4.58           | -14.03 | -13.09      | 3.69  |
| Ar                              | 0.82   | 0.84  | 0.70  | 2.16  | 1.25  | 1.14  | 2.10   | 3.74         | 3.61          | 3.41            | -3.91  | -3.52       | -2.81 |
| CH <sub>3</sub>                 | -3.60  | -2.95 | -3.06 | -2.37 | -2.99 | -2.20 | -1.19  | 0.55         | 0.29          | -0.04           | -9.39  | -8.35       | -0.07 |
| CH <sub>4</sub>                 | -0.27  | -0.31 | -0.42 | -0.13 | -0.01 | -0.15 | 0.09   | 1.26         | 1.36          | 1.16            | -4.28  | -3.99       | -0.62 |
| NH                              | -4.88  | -4.32 | -4.51 | -3.66 | -4.19 | -3.31 | -1.78  | -0.12        | -0.38         | -0.83           | -11.23 | -10.03      | 0.33  |
| NH <sub>2</sub>                 | -5.24  | -4.54 | -4.62 | -3.68 | -4.30 | -3.45 | -1.93  | -0.36        | -0.64         | -1.11           | -11.47 | -10.33      | 0.74  |
| NH <sub>3</sub>                 | -0.64  | -0.66 | -0.77 | -0.33 | -0.32 | -0.42 | -0.08  | 1.28         | 1.35          | 1.12            | -4.91  | -4.56       | -0.56 |
| OH                              | -7.27  | -6.46 | -6.55 | -5.33 | -6.13 | -5.05 | -2.94  | -1.72        | -1.98         | -2.53           | -14.28 | -12.99      | 1.83  |
| H <sub>2</sub> O                | -0.83  | -0.85 | -0.99 | -0.49 | -0.45 | -0.59 | -0.16  | 1.28         | 1.35          | 1.10            | -5.50  | -5.10       | -0.56 |
| HF                              | -0.83  | -0.87 | -1.06 | -0.50 | -0.42 | -0.61 | -0.15  | 1.27         | 1.36          | 1.11            | -5.98  | -5.54       | -0.63 |
| SiH <sub>3</sub>                | -3.98  | -3.54 | -3.59 | -3.29 | -4.26 | -3.01 | -2.59  | -1.11        | -1.18         | -1.31           | -8.95  | -8.18       | 0.93  |
| SiH <sub>4</sub>                | -0.39  | -0.37 | -0.43 | 0.15  | -0.15 | -0.13 | 0.19   | 1.45         | 1.48          | 1.28            | -4.48  | -4.12       | -1.11 |
| PH <sub>3</sub>                 | -0.64  | -0.61 | -0.67 | 0.06  | -0.35 | -0.36 | 0.03   | 1.27         | 1.28          | 1.09            | -4.85  | -4.34       | -1.21 |
| SH <sub>2</sub>                 | -0.84  | -0.79 | -0.86 | -0.14 | -0.50 | -0.51 | -0.05  | 1.22         | 1.23          | 1.03            | -5.32  | -4.74       | -0.49 |
| HCl                             | -1.14  | -1.08 | -1.16 | -0.59 | -0.76 | -0.69 | -0.10  | 1.19         | 1.20          | 0.99            | -5.95  | -5.46       | -0.52 |
| HCCH                            | -0.60  | -0.40 | -0.33 | -0.02 | -0.14 | 0.11  | 0.24   | 1.27         | 1.38          | 1.21            | -5.55  | -4.88       | -1.90 |
| CH <sub>2</sub> CH <sub>2</sub> | -1.33  | -1.12 | -1.01 | -0.81 | -0.88 | -0.36 | 0.19   | 1.46         | 1.56          | 1.35            | -6.39  | -5.67       | -1.86 |
| CH <sub>3</sub> CH <sub>3</sub> | -0.36  | -0.38 | -0.45 | -0.18 | -0.04 | -0.17 | 0.05   | 1.29         | 1.38          | 1.18            | -4.44  | -4.10       | -0.62 |
| HCN                             | -1.33  | -1.11 | -1.06 | -0.73 | -0.86 | -0.35 | 0.02   | 1.14         | 1.26          | 1.08            | -6.63  | -5.97       | -0.48 |
| CO                              | -2.26  | -2.01 | -1.95 | -1.64 | -1.76 | -1.13 | 0.27   | 1.77         | 1.54          | 1.08            | -7.82  | -7.15       | -1.50 |
| HCO                             | -3.81  | -3.46 | -3.51 | -3.34 | -3.38 | -2.72 | -1.52  | 0.14         | -0.12         | -0.57           | -9.45  | -8.66       | 0.02  |
| CH <sub>2</sub> O               | -2.94  | -2.68 | -2.59 | -2.31 | -2.44 | -1.77 | -0.36  | 1.16         | 0.92          | 0.46            | -8.58  | -7.83       | -0.55 |
| CH <sub>3</sub> OH              | -0.62  | -0.61 | -0.70 | -0.33 | -0.20 | -0.35 | -0.07  | 1.18         | 1.28          | 1.08            | -5.17  | -4.74       | -0.55 |
| N <sub>2</sub>                  | -2.22  | -1.96 | -1.92 | -1.65 | -1.70 | -1.02 | 0.63   | 2.10         | 1.81          | 1.29            | -8.04  | -7.36       | -2.24 |
| NH <sub>2</sub> NH <sub>2</sub> | -0.93  | -0.91 | -0.98 | -0.54 | -0.51 | -0.60 | -0.26  | 1.20         | 1.25          | 1.01            | -5.33  | -4.93       | -0.45 |
| NO                              | -4.61  | -4.25 | -4.17 | -3.96 | -4.08 | -3.20 | -1.48  | 0.03         | -0.29         | -0.87           | -10.76 | -10.06      | -0.42 |
| O <sub>2</sub>                  | -4.91  | -4.53 | -4.54 | -4.23 | -4.18 | -3.48 | -1.66  | -0.24        | -0.56         | -1.13           | -11.52 | -10.58      | -0.08 |
| HOOH                            | -1.95  | -1.68 | -1.68 | -1.14 | -1.39 | -0.71 | -0.08  | 1.42         | 1.50          | 1.25            | -8.03  | -7.34       | -0.92 |

|                                                 |       |       |       |       |       |       |       |       |       |       |        |        |       |
|-------------------------------------------------|-------|-------|-------|-------|-------|-------|-------|-------|-------|-------|--------|--------|-------|
| F <sub>2</sub>                                  | -6.28 | -5.87 | -5.83 | -5.47 | -5.76 | -4.59 | -2.26 | -1.37 | -1.59 | -2.15 | -13.51 | -12.73 | 0.42  |
| CO <sub>2</sub>                                 | -0.92 | -0.86 | -0.95 | -0.39 | -0.34 | -0.53 | -0.06 | 1.50  | 1.55  | 1.30  | -6.80  | -6.08  | -0.65 |
| P <sub>2</sub>                                  | -3.56 | -3.43 | -3.26 | -3.15 | -3.38 | -2.80 | -1.75 | -0.42 | -0.62 | -0.95 | -7.66  | -7.19  | 0.48  |
| S <sub>2</sub>                                  | -4.79 | -4.53 | -4.43 | -4.24 | -4.44 | -3.87 | -2.83 | -1.29 | -1.54 | -1.94 | -9.58  | -8.90  | 1.53  |
| Cl <sub>2</sub>                                 | -4.48 | -4.27 | -4.16 | -3.98 | -4.14 | -3.46 | -2.03 | -0.63 | -0.89 | -1.34 | -9.48  | -9.04  | 0.75  |
| NaCl                                            | -2.14 | -2.26 | -2.38 | -1.83 | -1.72 | -2.02 | -1.65 | -0.38 | -0.28 | -0.45 | -6.47  | -6.12  | 0.65  |
| SiO                                             | -3.00 | -2.86 | -2.75 | -2.54 | -2.84 | -2.25 | -1.21 | 0.20  | 0.01  | -0.33 | -7.32  | -6.82  | 0.03  |
| CS                                              | -3.60 | -3.42 | -3.28 | -3.13 | -3.25 | -2.63 | -1.36 | 0.12  | -0.12 | -0.55 | -8.34  | -7.79  | -0.09 |
| ClO                                             | -6.40 | -5.98 | -5.90 | -5.68 | -5.76 | -4.98 | -3.55 | -2.04 | -2.28 | -2.79 | -12.15 | -11.36 | 2.19  |
| ClF                                             | -4.72 | -4.47 | -4.37 | -4.13 | -4.33 | -3.52 | -1.86 | -0.53 | -0.79 | -1.27 | -10.36 | -9.81  | 0.44  |
| SiH <sub>3</sub> SiH <sub>3</sub>               | -0.70 | -0.61 | -0.60 | -0.06 | -0.43 | -0.28 | 0.07  | 1.38  | 1.38  | 1.19  | -4.92  | -4.39  | -0.69 |
| CH <sub>3</sub> Cl                              | -0.95 | -0.87 | -0.90 | -0.54 | -0.58 | -0.47 | -0.09 | 1.15  | 1.22  | 1.02  | -5.76  | -5.26  | -0.51 |
| CH <sub>3</sub> SH                              | -0.88 | -0.83 | -0.85 | -0.41 | -0.54 | -0.48 | -0.10 | 1.19  | 1.24  | 1.03  | -5.29  | -4.82  | -0.50 |
| SO <sub>2</sub>                                 | -4.64 | -4.42 | -4.33 | -4.25 | -4.35 | -3.76 | -2.43 | -0.95 | -1.20 | -1.66 | -10.16 | -9.57  | 0.81  |
| BF <sub>3</sub>                                 | -0.77 | -0.75 | -0.85 | -0.42 | -0.23 | -0.45 | -0.10 | 1.49  | 1.56  | 1.32  | -6.94  | -6.16  | -1.04 |
| BCl <sub>3</sub>                                | -3.00 | -2.74 | -2.57 | -2.38 | -2.49 | -2.01 | -0.95 | 0.67  | 0.43  | 0.03  | -7.98  | -7.35  | -0.17 |
| AlCl <sub>3</sub>                               | -2.50 | -2.23 | -2.17 | -1.62 | -2.10 | -1.70 | -1.00 | 0.51  | 0.39  | 0.18  | -7.13  | -6.64  | 0.06  |
| CF <sub>4</sub>                                 | 0.00  | -0.04 | -0.16 | 0.08  | 0.59  | 0.22  | 0.46  | 2.23  | 2.31  | 2.04  | -4.92  | -4.56  | -1.33 |
| CCl <sub>4</sub>                                | -2.92 | -2.76 | -2.65 | -2.51 | -2.76 | -1.97 | -0.69 | 0.79  | 0.56  | 0.14  | -7.80  | -7.36  | -0.46 |
| OCS                                             | -2.15 | -1.94 | -1.83 | -1.55 | -1.71 | -1.23 | -0.02 | 1.45  | 1.21  | 0.81  | -7.35  | -6.77  | -0.74 |
| CS <sub>2</sub>                                 | -3.00 | -2.85 | -2.70 | -2.52 | -2.71 | -2.24 | -1.21 | 0.13  | -0.05 | -0.37 | -7.64  | -7.13  | 0.01  |
| CF <sub>2</sub> O                               | -2.14 | -1.79 | -1.75 | -1.38 | -1.49 | -0.94 | 0.07  | 1.73  | 1.79  | 1.37  | -8.62  | -7.85  | -2.37 |
| SiF <sub>4</sub>                                | -1.30 | -1.15 | -1.21 | -0.67 | -0.70 | -0.72 | -0.16 | 1.49  | 1.49  | 1.24  | -6.65  | -6.15  | -0.81 |
| N <sub>2</sub> O                                | -1.84 | -1.57 | -1.54 | -1.23 | -1.30 | -0.83 | 0.49  | 2.10  | 1.84  | 1.37  | -7.92  | -7.24  | -2.01 |
| NF <sub>3</sub>                                 | -1.35 | -1.03 | -1.08 | -0.52 | -0.73 | 0.01  | 1.32  | 3.05  | 2.85  | 2.36  | -8.05  | -7.46  | -2.06 |
| PF <sub>3</sub>                                 | -1.08 | -0.88 | -0.82 | -0.46 | -0.68 | -0.30 | 0.37  | 1.82  | 1.82  | 1.54  | -6.23  | -5.69  | -1.23 |
| O <sub>3</sub>                                  | -6.52 | -6.24 | -6.20 | -6.25 | -6.20 | -5.65 | -4.16 | -2.74 | -3.00 | -3.48 | -12.94 | -12.23 | 1.93  |
| F <sub>2</sub> O                                | -4.69 | -4.32 | -4.32 | -3.97 | -4.18 | -3.24 | -1.14 | -0.02 | -0.28 | -0.82 | -11.60 | -10.90 | -0.31 |
| ClF <sub>3</sub>                                | -5.16 | -4.88 | -4.83 | -4.67 | -4.84 | -4.14 | -2.55 | -1.18 | -1.43 | -1.91 | -11.37 | -10.81 | 1.20  |
| CF <sub>2</sub> CF <sub>2</sub>                 | -0.68 | -0.50 | -0.59 | -0.18 | -0.12 | -0.19 | 0.15  | 1.87  | 1.91  | 1.67  | -7.06  | -6.31  | -1.65 |
| CF <sub>3</sub> CN                              | -2.28 | -1.96 | -1.87 | -1.56 | -1.73 | -1.15 | 0.17  | 1.73  | 1.48  | 1.03  | -8.04  | -7.37  | -0.96 |
| CH <sub>3</sub> CCH                             | -0.43 | -0.45 | -0.53 | -0.22 | -0.10 | -0.24 | -0.02 | 1.16  | 1.25  | 1.07  | -5.00  | -4.35  | -1.13 |
| CH <sub>2</sub> CCH <sub>2</sub>                | -1.03 | -0.85 | -0.76 | -0.58 | -0.59 | -0.16 | 0.07  | 1.33  | 1.42  | 1.22  | -6.03  | -5.37  | -0.56 |
| cylC <sub>3</sub> H <sub>4</sub>                | -1.33 | -1.10 | -0.99 | -0.71 | -0.80 | -0.34 | 0.19  | 1.38  | 1.49  | 1.30  | -6.42  | -5.68  | -1.82 |
| cylC <sub>3</sub> H <sub>6</sub>                | -0.26 | -0.27 | -0.33 | -0.11 | 0.10  | -0.04 | 0.13  | 1.45  | 1.54  | 1.33  | -4.40  | -4.03  | -0.65 |
| CH <sub>3</sub> CH <sub>2</sub> CH <sub>3</sub> | -0.43 | -0.42 | -0.47 | -0.21 | -0.14 | -0.19 | 0.03  | 1.29  | 1.36  | 1.17  | -4.49  | -4.13  | -0.60 |
| CH <sub>3</sub> CCCH <sub>3</sub>               | -0.48 | -0.48 | -0.55 | -0.24 | -0.11 | -0.27 | -0.04 | 1.20  | 1.29  | 1.09  | -4.69  | -4.20  | -0.67 |
| cylC <sub>4</sub> H <sub>6</sub>                | -0.85 | -0.66 | -0.55 | -0.36 | -0.39 | -0.08 | 0.09  | 1.36  | 1.45  | 1.25  | -5.92  | -5.20  | -1.41 |
| isobutane                                       | -0.54 | -0.51 | -0.54 | -0.26 | -0.39 | -0.25 | -0.01 | 1.25  | 1.32  | 1.13  | -4.63  | -4.24  | -0.56 |
| benzene                                         | -1.46 | -1.23 | -1.08 | -0.99 | -0.96 | -0.52 | 0.01  | 1.26  | 1.34  | 1.15  | -6.48  | -5.77  | -0.71 |
| CH <sub>2</sub> F <sub>2</sub>                  | -0.31 | -0.34 | -0.46 | -0.23 | 0.06  | -0.17 | 0.04  | 1.27  | 1.38  | 1.18  | -4.85  | -4.43  | -0.58 |
| CF <sub>3</sub> H                               | -0.28 | -0.30 | -0.43 | -0.19 | 0.13  | -0.13 | 0.08  | 1.34  | 1.45  | 1.26  | -4.94  | -4.54  | -0.60 |
| CH <sub>2</sub> Cl <sub>2</sub>                 | -1.62 | -1.46 | -1.40 | -1.10 | -1.24 | -0.80 | -0.13 | 1.17  | 1.20  | 0.98  | -6.53  | -6.03  | -0.49 |
| CCl <sub>3</sub> H                              | -2.23 | -2.07 | -1.98 | -1.75 | -1.96 | -1.31 | -0.21 | 1.17  | 1.08  | 0.75  | -7.12  | -6.64  | -0.83 |
| CH <sub>3</sub> NO <sub>2</sub>                 | -3.44 | -3.18 | -3.13 | -2.98 | -3.03 | -2.44 | -0.97 | 0.44  | 0.20  | -0.26 | -9.41  | -8.71  | -0.37 |
| CH <sub>3</sub> SiH <sub>3</sub>                | -0.70 | -0.64 | -0.65 | -0.24 | -0.41 | -0.33 | -0.02 | 1.24  | 1.30  | 1.10  | -4.85  | -4.42  | -0.53 |



|                                    |       |       |       |       |       |       |       |       |       |       |        |        |       |
|------------------------------------|-------|-------|-------|-------|-------|-------|-------|-------|-------|-------|--------|--------|-------|
| HCOOH                              | -1.79 | -1.51 | -1.45 | -1.13 | -1.25 | -0.66 | 0.02  | 1.39  | 1.47  | 1.25  | -7.58  | -6.83  | -0.57 |
| CH <sub>3</sub> CONH <sub>2</sub>  | -0.98 | -0.91 | -0.96 | -0.60 | -0.63 | -0.62 | -0.33 | 0.98  | 1.05  | 0.85  | -6.39  | -5.67  | -0.31 |
| cylNHC <sub>2</sub> H <sub>4</sub> | -0.52 | -0.50 | -0.56 | -0.29 | -0.12 | -0.24 | -0.01 | 1.27  | 1.36  | 1.16  | -4.89  | -4.46  | -0.56 |
| NCCN                               | -3.81 | -3.54 | -3.41 | -3.24 | -3.30 | -2.77 | -1.45 | 0.00  | -0.26 | -0.69 | -9.17  | -8.54  | -0.19 |
| CH <sub>3</sub> NHCH <sub>3</sub>  | -0.53 | -0.51 | -0.56 | -0.25 | -0.23 | -0.26 | -0.02 | 1.21  | 1.29  | 1.10  | -4.70  | -4.30  | -0.56 |
| CH <sub>2</sub> CO                 | -2.37 | -2.14 | -2.05 | -1.81 | -1.84 | -1.29 | -0.01 | 1.29  | 1.33  | 0.87  | -7.87  | -7.19  | -0.51 |
| cylOC <sub>2</sub> H <sub>4</sub>  | -0.30 | -0.32 | -0.41 | -0.16 | 0.04  | -0.12 | 0.08  | 1.33  | 1.43  | 1.23  | -4.53  | -4.17  | -0.86 |
| OCHCHO                             | -4.73 | -4.44 | -4.32 | -4.14 | -4.27 | -3.59 | -2.17 | -0.69 | -0.96 | -1.43 | -10.41 | -9.68  | 0.69  |
| CH <sub>3</sub> CH <sub>2</sub> OH | -0.63 | -0.62 | -0.69 | -0.33 | -0.24 | -0.35 | -0.08 | 1.19  | 1.28  | 1.08  | -5.06  | -4.64  | -0.53 |
| CH <sub>3</sub> OCH <sub>3</sub>   | -0.46 | -0.45 | -0.51 | -0.22 | -0.21 | -0.22 | 0.02  | 1.26  | 1.34  | 1.14  | -4.65  | -4.23  | -0.58 |
| cylSC <sub>2</sub> H <sub>4</sub>  | -1.12 | -0.97 | -0.90 | -0.61 | -0.72 | -0.35 | 0.04  | 1.34  | 1.41  | 1.21  | -5.91  | -5.33  | -0.78 |
| CH <sub>3</sub> SOCH <sub>3</sub>  | -0.69 | -0.67 | -0.70 | -0.40 | -0.47 | -0.42 | -0.20 | 1.08  | 1.16  | 0.97  | -5.25  | -4.66  | -0.40 |
| CH <sub>2</sub> CHF                | -1.26 | -1.02 | -0.95 | -0.74 | -0.81 | -0.31 | 0.13  | 1.38  | 1.48  | 1.28  | -6.61  | -5.89  | -0.88 |
| CH <sub>3</sub> CH <sub>2</sub> Cl | -0.75 | -0.67 | -0.69 | -0.37 | -0.39 | -0.34 | -0.07 | 1.20  | 1.28  | 1.08  | -5.51  | -4.98  | -0.51 |
| CH <sub>2</sub> CHCl               | -1.67 | -1.45 | -1.34 | -1.15 | -1.24 | -0.72 | 0.08  | 1.30  | 1.39  | 1.20  | -6.74  | -6.05  | -1.11 |
| CH <sub>3</sub> CClO               | -2.57 | -2.34 | -2.22 | -1.99 | -2.09 | -1.49 | -0.19 | 1.10  | 1.09  | 0.64  | -8.03  | -7.35  | -0.85 |
| prplCl                             | -0.90 | -0.81 | -0.80 | -0.49 | -0.63 | -0.43 | -0.13 | 1.17  | 1.23  | 1.03  | -5.57  | -5.05  | -0.48 |
| NC <sub>3</sub> H <sub>9</sub>     | -0.58 | -0.55 | -0.58 | -0.25 | -0.48 | -0.28 | -0.03 | 1.22  | 1.28  | 1.09  | -4.62  | -4.23  | -0.54 |
| cylOC <sub>4</sub> H <sub>4</sub>  | -1.09 | -0.87 | -0.77 | -0.64 | -0.63 | -0.19 | 0.09  | 1.29  | 1.39  | 1.20  | -6.29  | -5.60  | -0.74 |
| cylNHC <sub>4</sub> H <sub>4</sub> | -0.55 | -0.57 | -0.63 | -0.34 | -0.13 | -0.32 | -0.12 | 1.15  | 1.24  | 1.04  | -5.41  | -4.71  | -0.51 |
| NO <sub>2</sub>                    | -5.47 | -5.08 | -5.09 | -4.82 | -4.87 | -4.37 | -3.06 | -1.45 | -1.71 | -2.18 | -11.66 | -10.90 | 1.44  |
| SF <sub>6</sub>                    | -2.77 | -2.43 | -2.47 | -1.98 | -2.06 | -1.63 | -0.17 | 1.31  | 1.13  | 0.69  | -9.56  | -9.06  | -1.05 |
| CFCl <sub>3</sub>                  | -2.67 | -2.49 | -2.39 | -2.21 | -2.42 | -1.72 | -0.46 | 1.06  | 0.82  | 0.40  | -7.71  | -7.25  | -0.68 |
| CClF <sub>3</sub>                  | -1.55 | -1.32 | -1.30 | -0.91 | -1.11 | -0.60 | 0.38  | 1.97  | 1.88  | 1.52  | -7.16  | -6.62  | -1.06 |
| CBrF <sub>3</sub>                  | -2.16 | -1.92 | -1.91 | -1.43 | -1.73 | -1.29 | -0.16 | 1.46  | 1.25  | 0.86  | -7.66  | -7.11  | -0.81 |
| HCCF                               | -0.71 | -0.67 | -0.73 | -0.28 | -0.22 | -0.31 | 0.05  | 1.16  | 1.26  | 1.09  | -5.50  | -5.07  | -0.55 |
| HCCCN                              | -2.92 | -2.67 | -2.54 | -2.38 | -2.43 | -1.94 | -0.77 | 0.69  | 0.46  | 0.07  | -8.06  | -7.42  | -0.36 |
| NCCCCN                             | -4.24 | -3.97 | -3.81 | -3.72 | -3.73 | -3.29 | -2.18 | -0.76 | -0.99 | -1.37 | -9.45  | -8.82  | 0.68  |
| C <sub>2</sub> N <sub>2</sub>      | -3.81 | -3.54 | -3.41 | -3.24 | -3.30 | -2.77 | -1.45 | 0.00  | -0.26 | -0.69 | -9.17  | -8.54  | -0.19 |
| C <sub>3</sub> O <sub>2</sub>      | -2.83 | -2.55 | -2.44 | -2.30 | -2.28 | -1.92 | -0.79 | 0.68  | 0.44  | 0.05  | -8.49  | -7.84  | -0.74 |
| FCN                                | -1.65 | -1.52 | -1.58 | -0.96 | -1.05 | -1.02 | -0.32 | 1.23  | 1.23  | 0.95  | -6.85  | -6.40  | -0.66 |
| HCCCCH                             | -2.06 | -1.84 | -1.70 | -1.53 | -1.59 | -1.13 | -0.08 | 1.19  | 1.18  | 0.82  | -7.00  | -6.35  | -0.64 |
| H <sub>2</sub> CS                  | -3.81 | -3.63 | -3.48 | -3.37 | -3.48 | -2.85 | -1.67 | -0.19 | -0.41 | -0.81 | -8.66  | -8.04  | 0.28  |
| HCONH <sub>2</sub>                 | -1.02 | -0.77 | -0.85 | -0.50 | -0.49 | -0.52 | -0.24 | 1.08  | 1.17  | 0.95  | -6.59  | -5.85  | -0.35 |
| CH <sub>2</sub> CHCHO              | -3.32 | -3.07 | -2.93 | -2.81 | -2.87 | -2.27 | -1.07 | 0.40  | 0.18  | -0.23 | -8.68  | -7.95  | -0.46 |
| CH <sub>2</sub> CCl <sub>2</sub>   | -1.92 | -1.70 | -1.58 | -1.38 | -1.50 | -1.00 | 0.01  | 1.35  | 1.33  | 0.99  | -6.96  | -6.31  | -1.07 |
| CHFCF <sub>2</sub>                 | -1.06 | -0.77 | -0.74 | -0.46 | -0.56 | -0.22 | 0.03  | 1.35  | 1.45  | 1.25  | -7.05  | -6.32  | -0.54 |
| CH <sub>2</sub> CF <sub>2</sub>    | -1.01 | -0.75 | -0.70 | -0.41 | -0.51 | -0.16 | 0.07  | 1.38  | 1.47  | 1.27  | -6.67  | -5.95  | -1.03 |
| CH <sub>3</sub> F                  | -0.31 | -0.35 | -0.47 | -0.21 | 0.00  | -0.18 | 0.03  | 1.23  | 1.34  | 1.14  | -4.93  | -4.39  | -0.58 |
| CF <sub>2</sub> Cl <sub>2</sub>    | -2.17 | -1.97 | -1.90 | -1.63 | -1.84 | -1.21 | 0.02  | 1.57  | 1.35  | 0.93  | -7.44  | -6.95  | -0.90 |
| SiF <sub>2</sub>                   | -3.18 | -3.01 | -2.90 | -2.76 | -3.03 | -2.40 | -1.32 | 0.13  | -0.07 | -0.43 | -7.80  | -7.27  | 0.10  |
| MSE                                | 2.66  | 2.43  | 2.44  | 2.06  | 2.20  | 1.85  | 0.98  | -0.39 | -0.31 | 0.00  | 7.79   | 7.19   |       |
| MAE                                | 2.66  | 2.45  | 2.44  | 2.08  | 2.22  | 1.85  | 1.02  | 0.49  | 0.52  | 0.54  | 7.79   | 7.19   |       |
| rms                                | 2.97  | 2.72  | 2.70  | 2.37  | 2.55  | 2.07  | 1.11  | 0.59  | 0.62  | 0.63  | 8.06   | 7.43   |       |

TABLE VI: HOMO-LUMO gaps (in eV) of the FG131 database.

| Molecule                        | LSDA  | PBE   | BLYP  | M06L  | VS98  | B3LYP | M06-2X | $\omega$ B97 | $\omega$ B97X | $\omega$ B97X-D | LB94  | LB $\alpha$ | Ref.  |
|---------------------------------|-------|-------|-------|-------|-------|-------|--------|--------------|---------------|-----------------|-------|-------------|-------|
| H                               | 4.72  | 8.11  | 6.55  | 8.33  | 8.24  | 7.66  | 10.84  | 12.44        | 12.15         | 11.59           | 9.48  | 9.00        | 12.86 |
| He                              | 18.01 | 18.05 | 17.93 | 19.07 | 18.83 | 20.39 | 23.30  | 25.68        | 25.54         | 24.57           | 20.71 | 20.00       | 27.23 |
| Li                              | 1.13  | 1.88  | 1.46  | 1.97  | 1.61  | 2.17  | 3.93   | 5.60         | 5.57          | 5.41            | -2.55 | -2.50       | 4.22  |
| Be                              | 3.50  | 3.59  | 3.54  | 4.03  | 3.58  | 4.89  | 6.72   | 9.43         | 9.17          | 8.58            | 3.35  | 3.40        | 9.66  |
| B                               | 0.19  | 0.55  | 0.62  | 1.61  | 0.54  | 2.48  | 4.77   | 8.07         | 7.61          | 6.67            | -0.16 | 0.03        | 7.99  |
| C                               | 0.08  | 0.52  | 0.61  | 1.47  | 0.86  | 3.05  | 6.12   | 9.37         | 8.75          | 7.59            | -0.52 | -0.18       | 9.97  |
| N                               | 4.02  | 4.17  | 3.65  | 5.42  | 4.74  | 6.61  | 10.08  | 13.09        | 12.67         | 11.64           | 3.28  | 4.03        | 14.74 |
| O                               | 0.29  | 1.10  | 0.93  | 2.79  | 1.26  | 4.12  | 8.18   | 10.68        | 10.18         | 9.01            | -0.28 | 0.02        | 12.14 |
| F                               | 0.12  | 0.99  | 0.91  | 2.78  | 1.35  | 4.73  | 10.06  | 11.30        | 10.92         | 9.73            | -0.81 | -0.29       | 13.98 |
| Ne                              | 17.25 | 16.97 | 16.69 | 18.51 | 18.06 | 19.66 | 23.85  | 25.98        | 25.81         | 24.92           | 18.77 | 18.46       | 26.91 |
| Na                              | 0.91  | 1.58  | 0.98  | 2.21  | 1.69  | 1.78  | 4.01   | 5.11         | 5.20          | 5.12            | -1.92 | -2.04       | 4.14  |
| Mg                              | 3.39  | 3.36  | 3.36  | 3.74  | 3.22  | 4.37  | 5.85   | 7.93         | 7.85          | 7.46            | 3.68  | 3.60        | 7.76  |
| Al                              | 0.09  | 0.33  | 0.29  | 0.74  | 0.26  | 1.52  | 3.06   | 5.96         | 5.70          | 5.11            | -0.41 | -0.24       | 5.53  |
| Si                              | -0.02 | 0.24  | 0.21  | 0.54  | 0.42  | 1.77  | 3.86   | 7.06         | 6.61          | 5.76            | -0.52 | -0.29       | 6.73  |
| P                               | 2.16  | 2.57  | 2.02  | 3.04  | 2.77  | 3.87  | 5.96   | 9.53         | 8.93          | 8.05            | 0.65  | 1.44        | 9.78  |
| S                               | 0.04  | 0.51  | 0.32  | 0.87  | 0.37  | 2.31  | 5.00   | 8.07         | 7.48          | 6.52            | -0.64 | -0.35       | 8.23  |
| Cl                              | -0.07 | 0.39  | 0.26  | 0.87  | 0.55  | 2.57  | 5.86   | 8.79         | 8.12          | 6.98            | -0.76 | -0.41       | 9.30  |
| Ar                              | 11.23 | 11.14 | 10.86 | 12.74 | 11.78 | 12.82 | 15.67  | 18.64        | 18.16         | 17.33           | 11.85 | 11.76       | 18.65 |
| CH <sub>3</sub>                 | 1.79  | 2.48  | 2.16  | 3.26  | 2.47  | 4.27  | 6.64   | 9.96         | 9.44          | 8.55            | 0.67  | 1.22        | 9.86  |
| CH <sub>4</sub>                 | 9.21  | 9.14  | 8.97  | 9.66  | 9.58  | 10.63 | 12.51  | 15.18        | 14.96         | 14.16           | 10.08 | 9.88        | 15.06 |
| NH                              | 3.10  | 3.60  | 3.23  | 4.61  | 3.93  | 6.06  | 9.49   | 12.36        | 11.86         | 10.81           | 1.99  | 2.80        | 13.17 |
| NH <sub>2</sub>                 | 1.97  | 2.68  | 2.55  | 3.76  | 2.93  | 5.11  | 8.35   | 11.29        | 10.71         | 9.65            | 1.17  | 1.60        | 11.34 |
| NH <sub>3</sub>                 | 5.64  | 5.52  | 5.34  | 6.13  | 5.96  | 7.08  | 9.23   | 11.92        | 11.68         | 10.85           | 6.59  | 6.29        | 11.54 |
| OH                              | 0.16  | 0.92  | 0.83  | 2.27  | 1.24  | 3.97  | 8.14   | 10.44        | 9.91          | 8.74            | -0.63 | -0.22       | 11.27 |
| H <sub>2</sub> O                | 6.57  | 6.39  | 6.21  | 7.04  | 6.93  | 8.25  | 10.80  | 13.30        | 13.08         | 12.21           | 7.65  | 7.36        | 13.35 |
| HF                              | 9.00  | 8.78  | 8.58  | 9.55  | 9.44  | 10.95 | 13.93  | 16.00        | 15.86         | 15.01           | 10.40 | 10.09       | 16.91 |
| SiH <sub>3</sub>                | 1.32  | 1.83  | 1.54  | 2.10  | 1.17  | 3.13  | 4.63   | 7.68         | 7.41          | 6.85            | 0.15  | 0.58        | 7.95  |
| SiH <sub>4</sub>                | 8.14  | 8.15  | 8.01  | 8.97  | 8.54  | 9.54  | 11.27  | 14.11        | 13.85         | 13.10           | 8.43  | 8.36        | 14.03 |
| PH <sub>3</sub>                 | 6.13  | 6.11  | 5.93  | 6.91  | 6.45  | 7.32  | 8.99   | 11.77        | 11.54         | 10.85           | 6.32  | 6.33        | 11.82 |
| SH <sub>2</sub>                 | 5.57  | 5.52  | 5.30  | 6.26  | 5.93  | 6.82  | 8.72   | 11.52        | 11.24         | 10.49           | 5.56  | 5.65        | 11.00 |
| HCl                             | 7.02  | 6.97  | 6.76  | 7.70  | 7.43  | 8.55  | 10.81  | 13.56        | 13.25         | 12.43           | 7.06  | 7.05        | 13.36 |
| HCCH                            | 6.78  | 6.80  | 6.71  | 7.37  | 7.07  | 8.30  | 9.98   | 12.48        | 12.30         | 11.58           | 6.70  | 6.74        | 13.43 |
| CH <sub>2</sub> CH <sub>2</sub> | 5.60  | 5.62  | 5.56  | 6.07  | 5.85  | 7.26  | 9.29   | 12.02        | 11.83         | 11.10           | 5.46  | 5.49        | 12.57 |
| CH <sub>3</sub> CH <sub>3</sub> | 7.80  | 7.80  | 7.68  | 8.32  | 8.24  | 9.28  | 11.06  | 13.72        | 13.53         | 12.77           | 8.61  | 8.48        | 13.41 |
| HCN                             | 7.87  | 7.91  | 7.82  | 8.52  | 8.20  | 9.78  | 11.83  | 14.39        | 14.20         | 13.42           | 7.71  | 7.84        | 14.31 |
| CO                              | 6.87  | 7.04  | 7.06  | 7.70  | 7.46  | 9.41  | 12.56  | 15.52        | 14.98         | 13.89           | 6.54  | 6.72        | 15.57 |
| HCO                             | 1.31  | 1.69  | 1.59  | 2.00  | 1.82  | 3.80  | 6.52   | 9.54         | 9.05          | 8.06            | 0.97  | 1.30        | 9.56  |
| CH <sub>2</sub> O               | 3.41  | 3.58  | 3.64  | 4.27  | 3.91  | 5.91  | 9.16   | 11.74        | 11.28         | 10.28           | 3.27  | 3.43        | 11.56 |
| CH <sub>3</sub> OH              | 5.75  | 5.65  | 5.51  | 6.22  | 6.15  | 7.37  | 9.58   | 11.94        | 11.77         | 11.00           | 6.70  | 6.50        | 11.67 |
| N <sub>2</sub>                  | 8.21  | 8.32  | 8.35  | 8.88  | 8.75  | 10.96 | 14.62  | 17.27        | 16.72         | 15.58           | 7.85  | 8.12        | 17.88 |
| NH <sub>2</sub> NH <sub>2</sub> | 4.44  | 4.39  | 4.27  | 5.03  | 4.88  | 6.02  | 8.12   | 10.86        | 10.63         | 9.81            | 5.33  | 5.11        | 10.29 |
| NO                              | -0.04 | 0.28  | 0.35  | 0.71  | 0.51  | 3.00  | 6.57   | 9.18         | 8.64          | 7.48            | -0.24 | -0.05       | 10.11 |
| O <sub>2</sub>                  | 2.06  | 2.31  | 2.29  | 3.07  | 2.94  | 5.27  | 9.38   | 11.55        | 11.03         | 9.88            | 1.81  | 2.26        | 12.52 |
| HOOH                            | 4.66  | 4.78  | 4.76  | 5.62  | 5.20  | 7.41  | 10.21  | 12.66        | 12.48         | 11.63           | 4.57  | 4.59        | 12.65 |

|                                                 |       |       |       |       |       |       |       |       |       |       |       |       |       |
|-------------------------------------------------|-------|-------|-------|-------|-------|-------|-------|-------|-------|-------|-------|-------|-------|
| F <sub>2</sub>                                  | 3.42  | 3.62  | 3.67  | 4.57  | 3.97  | 6.98  | 11.97 | 13.27 | 12.88 | 11.75 | 3.24  | 3.31  | 15.53 |
| CO <sub>2</sub>                                 | 8.41  | 8.23  | 8.04  | 8.99  | 8.84  | 9.94  | 12.27 | 14.91 | 14.73 | 13.95 | 8.51  | 8.58  | 14.58 |
| P <sub>2</sub>                                  | 3.71  | 3.71  | 3.65  | 4.06  | 3.87  | 5.06  | 7.27  | 10.06 | 9.69  | 8.96  | 3.46  | 3.56  | 10.19 |
| S <sub>2</sub>                                  | 1.05  | 1.30  | 1.20  | 1.59  | 1.56  | 2.95  | 5.30  | 8.41  | 7.87  | 6.95  | 0.55  | 0.96  | 7.96  |
| Cl <sub>2</sub>                                 | 2.96  | 3.06  | 3.03  | 3.53  | 3.34  | 5.03  | 8.06  | 10.87 | 10.31 | 9.30  | 2.85  | 2.86  | 10.93 |
| NaCl                                            | 3.30  | 3.04  | 2.82  | 3.55  | 3.62  | 4.32  | 6.19  | 8.87  | 8.68  | 7.96  | 3.35  | 3.21  | 8.64  |
| SiO                                             | 4.61  | 4.62  | 4.62  | 5.07  | 4.76  | 6.37  | 8.89  | 11.64 | 11.26 | 10.44 | 4.74  | 4.82  | 11.60 |
| CS                                              | 3.85  | 3.98  | 4.02  | 4.42  | 4.33  | 6.05  | 8.86  | 11.90 | 11.37 | 10.37 | 3.62  | 3.81  | 11.58 |
| ClO                                             | -0.03 | 0.32  | 0.33  | 0.72  | 0.57  | 2.76  | 5.95  | 8.69  | 8.20  | 7.13  | -0.26 | -0.06 | 8.85  |
| ClF                                             | 3.28  | 3.40  | 3.40  | 3.99  | 3.71  | 5.72  | 9.19  | 11.80 | 11.26 | 10.19 | 3.08  | 3.14  | 12.43 |
| SiH <sub>3</sub> SiH <sub>3</sub>               | 6.56  | 6.58  | 6.45  | 7.26  | 6.99  | 7.82  | 9.34  | 12.19 | 11.97 | 11.32 | 6.37  | 6.53  | 11.33 |
| CH <sub>3</sub> Cl                              | 6.25  | 6.24  | 6.09  | 6.81  | 6.65  | 7.80  | 9.79  | 12.46 | 12.23 | 11.45 | 6.28  | 6.30  | 12.01 |
| CH <sub>3</sub> SH                              | 4.76  | 4.74  | 4.58  | 5.28  | 5.11  | 6.10  | 7.90  | 10.69 | 10.45 | 9.72  | 4.89  | 4.88  | 10.01 |
| SO <sub>2</sub>                                 | 3.64  | 3.66  | 3.68  | 3.96  | 3.83  | 5.67  | 8.72  | 11.40 | 10.93 | 9.94  | 3.51  | 3.61  | 11.74 |
| BF <sub>3</sub>                                 | 9.55  | 9.32  | 9.18  | 10.07 | 10.09 | 11.51 | 14.41 | 16.50 | 16.40 | 15.59 | 10.04 | 10.12 | 17.22 |
| BCl <sub>3</sub>                                | 4.85  | 4.98  | 4.98  | 5.57  | 5.41  | 6.85  | 9.56  | 12.58 | 12.02 | 11.05 | 4.68  | 4.87  | 12.07 |
| AlCl <sub>3</sub>                               | 5.66  | 5.79  | 5.68  | 6.66  | 6.12  | 7.43  | 9.77  | 12.68 | 12.25 | 11.48 | 5.73  | 5.76  | 12.13 |
| CF <sub>4</sub>                                 | 10.68 | 10.37 | 10.22 | 11.00 | 11.30 | 12.60 | 15.43 | 17.66 | 17.57 | 16.74 | 12.60 | 12.26 | 17.85 |
| CCl <sub>4</sub>                                | 4.90  | 4.93  | 4.88  | 5.42  | 5.22  | 6.87  | 9.82  | 12.69 | 12.15 | 11.14 | 4.86  | 4.86  | 11.97 |
| OCS                                             | 5.51  | 5.56  | 5.50  | 6.11  | 5.87  | 7.23  | 9.85  | 12.67 | 12.21 | 11.34 | 5.20  | 5.29  | 12.13 |
| CS <sub>2</sub>                                 | 3.94  | 3.97  | 3.92  | 4.39  | 4.21  | 5.38  | 7.63  | 10.32 | 9.92  | 9.20  | 3.74  | 3.81  | 10.19 |
| CF <sub>2</sub> O                               | 6.63  | 6.74  | 6.71  | 7.51  | 7.18  | 9.21  | 12.39 | 14.93 | 14.76 | 13.76 | 6.39  | 6.52  | 16.08 |
| SiF <sub>4</sub>                                | 9.66  | 9.54  | 9.43  | 10.46 | 10.26 | 11.82 | 14.86 | 17.10 | 16.90 | 16.09 | 10.87 | 10.66 | 16.95 |
| N <sub>2</sub> O                                | 6.81  | 6.84  | 6.77  | 7.42  | 7.14  | 8.80  | 11.79 | 14.54 | 14.07 | 13.11 | 6.56  | 6.62  | 15.01 |
| NF <sub>3</sub>                                 | 7.28  | 7.42  | 7.36  | 8.29  | 7.95  | 10.11 | 13.46 | 16.18 | 15.75 | 14.69 | 7.17  | 7.11  | 15.76 |
| PF <sub>3</sub>                                 | 6.43  | 6.48  | 6.48  | 7.12  | 6.83  | 8.28  | 10.41 | 13.26 | 13.04 | 12.24 | 6.72  | 6.79  | 13.00 |
| O <sub>3</sub>                                  | 1.72  | 1.79  | 1.80  | 2.05  | 1.96  | 4.07  | 7.52  | 10.04 | 9.55  | 8.49  | 1.46  | 1.55  | 11.06 |
| F <sub>2</sub> O                                | 3.22  | 3.40  | 3.43  | 4.17  | 3.77  | 6.49  | 11.06 | 12.80 | 12.34 | 11.20 | 3.13  | 3.15  | 13.82 |
| ClF <sub>3</sub>                                | 3.02  | 3.12  | 3.13  | 3.63  | 3.39  | 5.49  | 9.17  | 11.50 | 11.01 | 9.96  | 3.02  | 3.01  | 11.79 |
| CF <sub>2</sub> CF <sub>2</sub>                 | 5.88  | 5.81  | 5.67  | 6.32  | 6.30  | 7.42  | 9.40  | 12.30 | 12.13 | 11.38 | 5.72  | 5.81  | 12.45 |
| CF <sub>3</sub> CN                              | 7.49  | 7.61  | 7.57  | 8.26  | 7.94  | 9.65  | 12.72 | 15.63 | 15.08 | 14.04 | 7.22  | 7.43  | 15.39 |
| CH <sub>3</sub> CCH                             | 6.21  | 6.04  | 5.82  | 6.46  | 6.37  | 7.24  | 8.97  | 11.57 | 11.39 | 10.67 | 6.49  | 6.54  | 11.69 |
| CH <sub>2</sub> CCH <sub>2</sub>                | 5.69  | 5.71  | 5.66  | 6.13  | 5.96  | 7.35  | 9.03  | 11.71 | 11.54 | 10.82 | 5.55  | 5.60  | 10.83 |
| cylC <sub>3</sub> H <sub>4</sub>                | 4.90  | 5.01  | 4.99  | 5.55  | 5.27  | 6.71  | 8.70  | 11.26 | 11.11 | 10.41 | 4.79  | 4.90  | 11.87 |
| cylC <sub>3</sub> H <sub>6</sub>                | 6.97  | 6.80  | 6.61  | 7.15  | 7.24  | 8.11  | 9.73  | 12.56 | 12.37 | 11.61 | 7.64  | 7.48  | 11.64 |
| CH <sub>3</sub> CH <sub>2</sub> CH <sub>3</sub> | 7.30  | 7.33  | 7.25  | 7.86  | 7.73  | 8.81  | 10.56 | 13.22 | 13.02 | 12.28 | 8.12  | 8.00  | 12.72 |
| CH <sub>3</sub> CCCH <sub>3</sub>               | 5.58  | 5.45  | 5.24  | 5.88  | 5.78  | 6.64  | 8.34  | 10.98 | 10.79 | 10.08 | 6.21  | 6.12  | 10.46 |
| cylC <sub>4</sub> H <sub>6</sub>                | 5.33  | 5.38  | 5.34  | 5.82  | 5.62  | 6.84  | 8.45  | 11.11 | 10.94 | 10.24 | 5.20  | 5.25  | 11.14 |
| isobutane                                       | 7.04  | 7.06  | 6.99  | 7.60  | 7.36  | 8.53  | 10.25 | 12.93 | 12.74 | 12.00 | 7.77  | 7.69  | 12.28 |
| benzene                                         | 5.08  | 5.10  | 5.06  | 5.43  | 5.32  | 6.56  | 8.43  | 10.95 | 10.83 | 10.21 | 4.96  | 4.98  | 10.16 |
| CH <sub>2</sub> F <sub>2</sub>                  | 7.94  | 7.81  | 7.69  | 8.27  | 8.37  | 9.61  | 11.80 | 14.03 | 13.92 | 13.16 | 9.39  | 9.24  | 14.15 |
| CF <sub>3</sub> H                               | 9.23  | 9.05  | 8.92  | 9.51  | 9.71  | 10.89 | 13.13 | 15.34 | 15.24 | 14.48 | 10.78 | 10.60 | 15.44 |
| CH <sub>2</sub> Cl <sub>2</sub>                 | 5.86  | 5.92  | 5.86  | 6.49  | 6.30  | 7.76  | 10.05 | 12.75 | 12.49 | 11.70 | 5.80  | 5.84  | 12.18 |
| CCl <sub>3</sub> H                              | 5.31  | 5.36  | 5.29  | 5.91  | 5.69  | 7.25  | 10.00 | 12.76 | 12.37 | 11.47 | 5.26  | 5.29  | 12.38 |
| CH <sub>3</sub> NO <sub>2</sub>                 | 3.67  | 3.74  | 3.73  | 4.23  | 4.04  | 6.07  | 9.66  | 11.98 | 11.50 | 10.47 | 3.44  | 3.55  | 11.94 |
| CH <sub>3</sub> SiH <sub>3</sub>                | 7.30  | 7.27  | 7.14  | 7.88  | 7.66  | 8.67  | 10.35 | 13.18 | 12.96 | 12.23 | 7.60  | 7.60  | 12.35 |

|                                    |       |       |       |       |       |       |       |       |       |       |       |       |       |
|------------------------------------|-------|-------|-------|-------|-------|-------|-------|-------|-------|-------|-------|-------|-------|
| HCOOH                              | 5.13  | 5.22  | 5.23  | 5.83  | 5.58  | 7.51  | 10.15 | 12.55 | 12.39 | 11.60 | 4.95  | 5.09  | 11.98 |
| CH <sub>3</sub> CONH <sub>2</sub>  | 4.98  | 4.88  | 4.76  | 5.43  | 5.30  | 6.56  | 8.77  | 11.14 | 10.97 | 10.20 | 4.89  | 5.04  | 10.05 |
| cylNHC <sub>2</sub> H <sub>4</sub> | 5.36  | 5.28  | 5.11  | 5.74  | 5.71  | 6.74  | 8.62  | 11.21 | 11.03 | 10.28 | 6.12  | 5.94  | 10.44 |
| NCCN                               | 5.83  | 5.85  | 5.82  | 6.33  | 6.09  | 7.67  | 10.56 | 13.34 | 12.81 | 11.85 | 5.74  | 5.79  | 13.90 |
| CH <sub>3</sub> NHCH <sub>3</sub>  | 4.60  | 4.55  | 4.43  | 5.07  | 4.91  | 6.02  | 7.88  | 10.40 | 10.22 | 9.49  | 5.52  | 5.31  | 9.65  |
| CH <sub>2</sub> CO                 | 3.72  | 3.76  | 3.74  | 4.27  | 4.07  | 5.65  | 8.38  | 11.02 | 10.83 | 9.88  | 3.42  | 3.47  | 10.32 |
| cylOC <sub>2</sub> H <sub>4</sub>  | 6.10  | 5.95  | 5.79  | 6.40  | 6.38  | 7.59  | 9.79  | 12.03 | 11.89 | 11.13 | 7.34  | 7.06  | 11.68 |
| OCHCHO                             | 1.80  | 1.94  | 2.03  | 2.50  | 2.26  | 4.18  | 7.34  | 9.93  | 9.45  | 8.46  | 1.57  | 1.77  | 10.04 |
| CH <sub>3</sub> CH <sub>2</sub> OH | 5.64  | 5.54  | 5.42  | 6.09  | 6.04  | 7.25  | 9.43  | 11.82 | 11.64 | 10.87 | 6.63  | 6.43  | 11.38 |
| CH <sub>3</sub> OCH <sub>3</sub>   | 5.47  | 5.38  | 5.26  | 5.89  | 5.71  | 6.98  | 9.06  | 11.40 | 11.24 | 10.50 | 6.64  | 6.44  | 10.79 |
| cylSC <sub>2</sub> H <sub>4</sub>  | 4.34  | 4.39  | 4.32  | 4.86  | 4.71  | 6.01  | 7.86  | 10.60 | 10.40 | 9.67  | 4.13  | 4.20  | 9.93  |
| CH <sub>3</sub> SOCH <sub>3</sub>  | 4.83  | 4.71  | 4.59  | 5.09  | 5.01  | 6.09  | 7.86  | 10.38 | 10.23 | 9.54  | 5.34  | 5.38  | 9.54  |
| CH <sub>2</sub> CHF                | 5.46  | 5.50  | 5.45  | 5.97  | 5.75  | 7.24  | 9.20  | 11.80 | 11.66 | 10.94 | 5.41  | 5.45  | 11.55 |
| CH <sub>3</sub> CH <sub>2</sub> Cl | 6.31  | 6.31  | 6.16  | 6.84  | 6.73  | 7.79  | 9.67  | 12.37 | 12.14 | 11.37 | 6.36  | 6.41  | 11.74 |
| CH <sub>2</sub> CHCl               | 4.92  | 4.97  | 4.93  | 5.41  | 5.23  | 6.63  | 8.86  | 11.48 | 11.30 | 10.61 | 4.76  | 4.86  | 11.35 |
| CH <sub>3</sub> CClO               | 4.72  | 4.79  | 4.80  | 5.40  | 5.18  | 6.91  | 9.96  | 12.37 | 12.13 | 11.16 | 4.49  | 4.67  | 11.97 |
| prplCl                             | 6.13  | 6.14  | 6.01  | 6.69  | 6.48  | 7.66  | 9.56  | 12.29 | 12.05 | 11.28 | 6.25  | 6.29  | 11.63 |
| NC <sub>3</sub> H <sub>9</sub>     | 4.34  | 4.30  | 4.19  | 4.82  | 4.50  | 5.71  | 7.54  | 10.05 | 9.87  | 9.16  | 5.30  | 5.09  | 9.10  |
| cylOC <sub>4</sub> H <sub>4</sub>  | 4.79  | 4.80  | 4.75  | 5.13  | 5.00  | 6.30  | 7.92  | 10.49 | 10.36 | 9.71  | 4.62  | 4.63  | 9.82  |
| cylNHC <sub>4</sub> H <sub>4</sub> | 4.79  | 4.57  | 4.34  | 4.88  | 4.94  | 5.60  | 7.14  | 9.72  | 9.60  | 8.96  | 4.85  | 4.86  | 8.89  |
| NO <sub>2</sub>                    | 1.13  | 1.42  | 1.39  | 1.86  | 1.75  | 3.82  | 7.09  | 9.70  | 9.23  | 8.20  | 0.93  | 1.19  | 9.79  |
| SF <sub>6</sub>                    | 7.63  | 7.70  | 7.64  | 8.68  | 8.46  | 10.47 | 14.54 | 16.42 | 16.10 | 15.10 | 7.71  | 7.52  | 16.98 |
| CFCl <sub>3</sub>                  | 5.21  | 5.26  | 5.20  | 5.79  | 5.58  | 7.20  | 10.13 | 13.03 | 12.48 | 11.48 | 5.11  | 5.13  | 12.61 |
| CClF <sub>3</sub>                  | 7.18  | 7.24  | 7.13  | 7.93  | 7.69  | 9.26  | 12.00 | 14.94 | 14.55 | 13.59 | 6.89  | 6.92  | 14.27 |
| CBrF <sub>3</sub>                  | 5.84  | 5.91  | 5.77  | 6.60  | 6.27  | 7.69  | 10.40 | 13.35 | 12.89 | 11.98 | 5.39  | 5.42  | 12.97 |
| HCCF                               | 6.50  | 6.35  | 6.15  | 6.94  | 6.81  | 7.81  | 9.77  | 12.25 | 12.08 | 11.36 | 6.98  | 6.79  | 12.04 |
| HCCCN                              | 5.17  | 5.19  | 5.16  | 5.65  | 5.42  | 6.87  | 9.51  | 12.31 | 11.83 | 10.94 | 5.06  | 5.11  | 12.20 |
| NCCCCN                             | 4.44  | 4.47  | 4.45  | 4.87  | 4.67  | 6.07  | 8.63  | 11.31 | 10.84 | 9.99  | 4.37  | 4.42  | 11.52 |
| C <sub>2</sub> N <sub>2</sub>      | 5.83  | 5.85  | 5.82  | 6.33  | 6.09  | 7.67  | 10.56 | 13.34 | 12.81 | 11.85 | 5.74  | 5.79  | 13.90 |
| C <sub>3</sub> O <sub>2</sub>      | 4.67  | 4.71  | 4.69  | 5.15  | 4.97  | 6.33  | 8.87  | 11.49 | 11.07 | 10.27 | 4.47  | 4.52  | 11.64 |
| FCN                                | 7.31  | 7.21  | 7.04  | 8.02  | 7.73  | 8.96  | 11.39 | 14.25 | 13.97 | 13.12 | 7.76  | 7.59  | 14.33 |
| HCCCCH                             | 4.77  | 4.80  | 4.77  | 5.25  | 5.01  | 6.37  | 8.83  | 11.43 | 11.18 | 10.34 | 4.69  | 4.74  | 11.00 |
| H <sub>2</sub> CS                  | 1.80  | 1.91  | 1.92  | 2.25  | 2.11  | 3.68  | 6.29  | 9.21  | 8.73  | 7.81  | 1.48  | 1.63  | 9.18  |
| HCONH <sub>2</sub>                 | 5.15  | 5.25  | 5.11  | 5.76  | 5.64  | 6.90  | 9.10  | 11.47 | 11.32 | 10.54 | 5.00  | 5.14  | 10.81 |
| CH <sub>2</sub> CHCHO              | 2.82  | 2.94  | 3.01  | 3.48  | 3.26  | 5.13  | 8.24  | 10.78 | 10.32 | 9.36  | 2.75  | 2.92  | 10.70 |
| CH <sub>2</sub> CCl <sub>2</sub>   | 4.69  | 4.74  | 4.70  | 5.17  | 5.02  | 6.37  | 8.81  | 11.53 | 11.25 | 10.41 | 4.58  | 4.67  | 11.17 |
| CHFCF <sub>2</sub>                 | 5.39  | 5.45  | 5.41  | 5.96  | 5.74  | 7.20  | 9.02  | 11.59 | 11.48 | 10.77 | 5.31  | 5.37  | 11.11 |
| CH <sub>2</sub> CF <sub>2</sub>    | 5.77  | 5.81  | 5.76  | 6.35  | 6.11  | 7.51  | 9.29  | 11.92 | 11.78 | 11.05 | 5.66  | 5.72  | 11.81 |
| CH <sub>3</sub> F                  | 7.88  | 7.74  | 7.59  | 8.26  | 8.23  | 9.50  | 11.72 | 13.94 | 13.81 | 13.06 | 9.02  | 8.98  | 14.09 |
| CF <sub>2</sub> Cl <sub>2</sub>    | 6.06  | 6.12  | 6.04  | 6.70  | 6.49  | 8.08  | 10.99 | 13.92 | 13.39 | 12.39 | 5.87  | 5.91  | 13.33 |
| SIF <sub>2</sub>                   | 4.09  | 4.13  | 4.15  | 4.53  | 4.22  | 5.76  | 8.11  | 11.02 | 10.63 | 9.81  | 4.26  | 4.31  | 11.04 |
| MSE                                | -7.05 | -6.94 | -7.05 | -6.34 | -6.60 | -5.11 | -2.57 | 0.04  | -0.27 | -1.12 | -6.99 | -6.94 |       |
| MAE                                | 7.05  | 6.94  | 7.05  | 6.34  | 6.60  | 5.11  | 2.57  | 0.49  | 0.57  | 1.16  | 6.99  | 6.94  |       |
| rms                                | 7.27  | 7.15  | 7.25  | 6.53  | 6.81  | 5.26  | 2.66  | 0.65  | 0.77  | 1.41  | 7.29  | 7.20  |       |

TABLE VII:  $\epsilon_{N+1}(N+1) - \epsilon_N(N)$  (in eV) of the FG131 database.

| Molecule                        | LSDA  | PBE   | BLYP  | M06L  | VS98  | B3LYP | M06-2X | $\omega$ B97 | $\omega$ B97X | $\omega$ B97X-D | LB94  | LB $\alpha$ | Ref.  |
|---------------------------------|-------|-------|-------|-------|-------|-------|--------|--------------|---------------|-----------------|-------|-------------|-------|
| H                               | 9.19  | 9.56  | 9.46  | 9.56  | 9.69  | 9.99  | 10.64  | 10.54        | 10.41         | 10.21           | 11.16 | 11.03       | 12.86 |
| He                              | 21.81 | 21.82 | 22.22 | 22.68 | 22.05 | 23.73 | 25.85  | 25.22        | 25.05         | 24.53           | 27.40 | 26.47       | 27.23 |
| Li                              | 3.98  | 4.10  | 4.03  | 4.07  | 4.15  | 4.23  | 4.35   | 4.63         | 4.57          | 4.51            | 4.72  | 4.73        | 4.22  |
| Be                              | 7.51  | 7.50  | 7.55  | 7.68  | 7.71  | 7.95  | 8.53   | 9.21         | 8.97          | 8.69            | 8.93  | 8.86        | 9.66  |
| B                               | 6.19  | 6.31  | 6.38  | 6.65  | 6.44  | 6.77  | 6.94   | 7.46         | 7.32          | 7.09            | 7.74  | 7.66        | 7.99  |
| C                               | 8.08  | 8.16  | 8.20  | 8.62  | 8.41  | 8.62  | 8.94   | 9.08         | 8.98          | 8.83            | 9.59  | 9.56        | 9.97  |
| N                               | 11.94 | 11.81 | 11.60 | 12.32 | 12.34 | 12.37 | 13.38  | 12.83        | 12.85         | 12.76           | 13.15 | 13.60       | 14.74 |
| O                               | 10.27 | 10.51 | 10.55 | 10.94 | 10.40 | 10.92 | 11.23  | 10.95        | 10.96         | 10.94           | 12.20 | 11.88       | 12.14 |
| F                               | 12.13 | 12.28 | 12.31 | 12.62 | 12.21 | 12.67 | 13.13  | 12.55        | 12.64         | 12.68           | 13.99 | 13.70       | 13.98 |
| Ne                              | 23.40 | 23.15 | 23.41 | 24.18 | 23.85 | 24.98 | 26.66  | 26.01        | 25.92         | 25.61           | 27.69 | 27.30       | 26.91 |
| Na                              | 3.88  | 3.88  | 3.88  | 3.85  | 3.70  | 4.05  | 4.31   | 4.14         | 4.20          | 4.20            | 4.93  | 4.81        | 4.14  |
| Mg                              | 6.20  | 6.08  | 6.12  | 6.19  | 6.15  | 6.52  | 7.21   | 7.77         | 7.66          | 7.39            | 8.04  | 7.81        | 7.76  |
| Al                              | 4.54  | 4.67  | 4.62  | 4.62  | 4.81  | 4.83  | 4.89   | 5.40         | 5.30          | 5.16            | 5.37  | 5.38        | 5.53  |
| Si                              | 5.76  | 5.87  | 5.82  | 5.86  | 6.08  | 6.02  | 6.14   | 6.47         | 6.37          | 6.24            | 6.52  | 6.56        | 6.73  |
| P                               | 8.13  | 8.20  | 7.93  | 8.38  | 8.58  | 8.33  | 8.72   | 9.07         | 8.86          | 8.63            | 8.49  | 8.89        | 9.78  |
| S                               | 7.25  | 7.35  | 7.34  | 7.23  | 7.37  | 7.53  | 7.67   | 7.74         | 7.67          | 7.60            | 8.34  | 8.19        | 8.23  |
| Cl                              | 8.38  | 8.45  | 8.44  | 8.30  | 8.50  | 8.61  | 8.75   | 8.72         | 8.69          | 8.64            | 9.35  | 9.24        | 9.30  |
| Ar                              | 15.52 | 15.49 | 15.55 | 16.12 | 16.24 | 16.52 | 17.49  | 18.48        | 18.01         | 17.40           | 18.23 | 18.13       | 18.65 |
| CH <sub>3</sub>                 | 8.04  | 8.21  | 8.10  | 8.29  | 8.31  | 8.55  | 8.88   | 9.05         | 8.96          | 8.76            | 9.35  | 9.39        | 9.86  |
| CH <sub>4</sub>                 | 11.47 | 11.42 | 11.55 | 11.96 | 11.57 | 12.59 | 13.92  | 14.96        | 14.59         | 13.91           | 14.78 | 14.54       | 15.06 |
| NH                              | 11.04 | 11.09 | 10.94 | 11.44 | 11.42 | 11.57 | 12.22  | 11.89        | 11.87         | 11.79           | 12.11 | 12.44       | 13.17 |
| NH <sub>2</sub>                 | 9.87  | 10.05 | 10.08 | 10.19 | 10.10 | 10.41 | 10.74  | 10.63        | 10.57         | 10.49           | 11.27 | 11.15       | 11.34 |
| NH <sub>3</sub>                 | 8.47  | 8.36  | 8.49  | 8.73  | 8.46  | 9.49  | 10.87  | 11.66        | 11.29         | 10.63           | 11.91 | 11.53       | 11.54 |
| OH                              | 9.79  | 9.94  | 9.97  | 10.09 | 9.90  | 10.28 | 10.61  | 10.32        | 10.33         | 10.30           | 11.38 | 11.13       | 11.27 |
| H <sub>2</sub> O                | 9.85  | 9.69  | 9.86  | 10.07 | 9.81  | 11.02 | 12.72  | 13.04        | 12.70         | 12.05           | 13.66 | 13.24       | 13.35 |
| HF                              | 12.50 | 12.30 | 12.51 | 12.82 | 12.43 | 13.92 | 16.02  | 15.77        | 15.50         | 14.90           | 17.10 | 16.62       | 16.91 |
| SiH <sub>3</sub>                | 6.80  | 6.98  | 6.86  | 7.02  | 7.05  | 7.15  | 7.37   | 7.60         | 7.50          | 7.35            | 7.49  | 7.58        | 7.95  |
| SiH <sub>4</sub>                | 10.55 | 10.54 | 10.64 | 11.11 | 10.73 | 11.55 | 12.60  | 13.86        | 13.51         | 12.87           | 13.11 | 12.97       | 14.03 |
| PH <sub>3</sub>                 | 8.72  | 8.68  | 8.75  | 8.90  | 8.80  | 9.47  | 10.33  | 11.53        | 11.22         | 10.65           | 11.34 | 11.13       | 11.82 |
| SH <sub>2</sub>                 | 8.44  | 8.36  | 8.41  | 8.52  | 8.49  | 9.18  | 10.19  | 11.25        | 10.89         | 10.29           | 11.06 | 10.87       | 11.00 |
| HCl                             | 10.49 | 10.43 | 10.46 | 10.67 | 10.65 | 11.32 | 12.46  | 13.28        | 12.90         | 12.30           | 13.30 | 13.13       | 13.36 |
| HCCH                            | 9.23  | 9.01  | 9.02  | 9.42  | 9.02  | 9.88  | 11.22  | 12.39        | 12.05         | 11.41           | 13.61 | 13.41       | 13.43 |
| CH <sub>2</sub> CH <sub>2</sub> | 9.01  | 8.79  | 8.82  | 9.15  | 8.73  | 9.54  | 10.68  | 11.77        | 11.45         | 10.84           | 12.30 | 12.39       | 12.57 |
| CH <sub>3</sub> CH <sub>3</sub> | 10.06 | 10.07 | 10.20 | 10.69 | 10.12 | 11.18 | 12.44  | 13.52        | 13.18         | 12.54           | 13.24 | 13.05       | 13.41 |
| HCN                             | 11.53 | 12.62 | 11.38 | 11.89 | 11.26 | 12.20 | 13.46  | 14.07        | 13.72         | 13.14           | 15.48 | 15.35       | 14.31 |
| CO                              | 12.93 | 12.77 | 12.92 | 13.22 | 13.14 | 13.88 | 15.01  | 15.69        | 15.33         | 14.74           | 15.35 | 15.28       | 15.57 |
| HCO                             | 7.99  | 8.09  | 8.06  | 8.11  | 8.23  | 8.73  | 9.15   | 9.17         | 9.11          | 8.97            | 9.56  | 9.61        | 9.56  |
| CH <sub>2</sub> O               | 8.94  | 8.72  | 8.87  | 9.24  | 8.48  | 9.61  | 11.63  | 11.60        | 11.48         | 11.23           | 11.86 | 11.77       | 11.56 |
| CH <sub>3</sub> OH              | 8.28  | 8.15  | 8.27  | 8.68  | 8.23  | 9.44  | 11.12  | 11.70        | 11.39         | 10.76           | 12.07 | 11.72       | 11.67 |
| N <sub>2</sub>                  | 15.84 | 15.72 | 15.77 | 16.07 | 16.22 | 16.66 | 17.63  | 17.52        | 17.41         | 17.18           | 17.30 | 17.38       | 17.88 |
| NH <sub>2</sub> NH <sub>2</sub> | 7.44  | 7.41  | 7.53  | 7.99  | 7.41  | 8.50  | 9.85   | 10.55        | 10.21         | 9.61            | 10.74 | 10.43       | 10.29 |
| NO                              | 8.76  | 8.82  | 8.88  | 9.08  | 9.01  | 9.36  | 9.75   | 9.55         | 9.54          | 9.48            | 10.15 | 10.12       | 10.11 |
| O <sub>2</sub>                  | 11.42 | 11.42 | 11.39 | 12.03 | 11.83 | 11.96 | 12.56  | 12.05        | 12.09         | 12.09           | 12.44 | 12.65       | 12.52 |
| HOOH                            | 8.99  | 8.85  | 9.02  | 9.34  | 8.94  | 10.28 | 12.05  | 12.41        | 12.09         | 11.44           | 13.08 | 12.80       | 12.65 |

|                                                 |       |       |       |       |       |       |       |       |       |       |       |       |       |
|-------------------------------------------------|-------|-------|-------|-------|-------|-------|-------|-------|-------|-------|-------|-------|-------|
| F <sub>2</sub>                                  | 14.02 | 13.92 | 13.93 | 14.47 | 14.01 | 14.45 | 15.07 | 14.63 | 14.65 | 14.63 | 15.40 | 15.18 | 15.53 |
| CO <sub>2</sub>                                 | 11.90 | 11.69 | 11.78 | 12.16 | 11.82 | 12.80 | 14.21 | 14.69 | 14.40 | 13.84 | 17.51 | 17.22 | 14.58 |
| P <sub>2</sub>                                  | 9.37  | 9.28  | 9.20  | 9.45  | 9.47  | 9.34  | 9.63  | 9.60  | 9.58  | 9.55  | 9.96  | 9.92  | 10.19 |
| S <sub>2</sub>                                  | 7.40  | 7.50  | 7.39  | 7.59  | 7.73  | 7.65  | 7.82  | 7.98  | 7.87  | 7.76  | 7.75  | 7.97  | 7.96  |
| Cl <sub>2</sub>                                 | 9.55  | 9.53  | 9.49  | 9.85  | 9.80  | 9.96  | 10.55 | 10.64 | 10.52 | 10.36 | 10.55 | 10.46 | 10.93 |
| NaCl                                            | 6.24  | 6.13  | 6.15  | 6.18  | 6.25  | 6.87  | 7.98  | 8.63  | 8.31  | 7.75  | 8.95  | 8.71  | 8.64  |
| SiO                                             | 9.96  | 9.83  | 9.88  | 10.10 | 10.14 | 10.48 | 11.28 | 11.37 | 11.26 | 11.02 | 11.67 | 11.55 | 11.60 |
| CS                                              | 10.42 | 10.40 | 10.40 | 10.77 | 10.71 | 10.89 | 11.44 | 11.53 | 11.39 | 11.24 | 11.26 | 11.30 | 11.58 |
| ClO                                             | 8.16  | 8.27  | 8.26  | 8.28  | 8.30  | 8.46  | 8.56  | 8.54  | 8.53  | 8.50  | 8.86  | 8.83  | 8.85  |
| ClF                                             | 10.86 | 10.81 | 10.80 | 11.34 | 11.08 | 11.34 | 12.02 | 11.92 | 11.82 | 11.68 | 12.07 | 11.97 | 12.43 |
| SiH <sub>3</sub> SiH <sub>3</sub>               | 9.22  | 9.14  | 9.17  | 9.43  | 9.47  | 9.85  | 10.97 | 11.96 | 11.66 | 11.13 | 11.05 | 11.07 | 11.33 |
| CH <sub>3</sub> Cl                              | 9.16  | 9.07  | 9.14  | 9.51  | 9.17  | 10.03 | 11.27 | 12.18 | 11.82 | 11.19 | 12.09 | 11.94 | 12.01 |
| CH <sub>3</sub> SH                              | 7.53  | 7.46  | 7.51  | 7.88  | 7.47  | 8.29  | 9.30  | 10.42 | 10.08 | 9.48  | 10.14 | 9.99  | 10.01 |
| SO <sub>2</sub>                                 | 10.99 | 10.86 | 10.88 | 11.13 | 10.99 | 11.15 | 11.57 | 11.34 | 11.34 | 11.31 | 11.78 | 11.71 | 11.74 |
| BF <sub>3</sub>                                 | 12.70 | 12.51 | 12.63 | 13.25 | 12.56 | 14.14 | 16.20 | 16.32 | 16.08 | 15.46 | 18.03 | 16.79 | 17.22 |
| BCl <sub>3</sub>                                | 10.80 | 10.71 | 10.70 | 11.01 | 10.93 | 11.07 | 11.69 | 13.05 | 12.65 | 12.01 | 11.31 | 11.33 | 12.07 |
| AlCl <sub>3</sub>                               | 9.67  | 9.64  | 9.59  | 10.35 | 10.04 | 10.42 | 11.49 | 12.30 | 11.93 | 11.42 | 11.28 | 11.20 | 12.13 |
| CF <sub>4</sub>                                 | 13.60 | 13.40 | 13.52 | 14.43 | 13.65 | 15.12 | 17.23 | 17.39 | 17.16 | 16.53 | 18.12 | 17.76 | 17.85 |
| CCl <sub>4</sub>                                | 9.86  | 9.80  | 9.70  | 10.32 | 10.19 | 10.52 | 11.57 | 12.05 | 11.77 | 11.35 | 10.54 | 10.50 | 11.97 |
| OCS                                             | 10.09 | 9.97  | 9.94  | 10.91 | 9.93  | 10.60 | 11.43 | 12.60 | 12.29 | 11.75 | 12.69 | 12.63 | 12.13 |
| CS <sub>2</sub>                                 | 9.50  | 9.41  | 9.30  | 9.77  | 9.65  | 9.50  | 9.78  | 9.74  | 9.67  | 9.66  | 10.21 | 10.18 | 10.19 |
| CF <sub>2</sub> O                               | 11.46 | 11.26 | 11.36 | 12.00 | 11.41 | 12.61 | 14.30 | 14.71 | 14.41 | 13.79 | 15.78 | 15.69 | 16.08 |
| SiF <sub>4</sub>                                | 13.30 | 13.17 | 13.23 | 14.05 | 13.39 | 14.71 | 16.62 | 16.97 | 16.69 | 16.08 | 17.03 | 16.74 | 16.95 |
| N <sub>2</sub> O                                | 11.89 | 11.68 | 11.77 | 11.96 | 11.86 | 12.64 | 13.71 | 14.33 | 14.06 | 13.54 | 15.49 | 15.38 | 15.01 |
| NF <sub>3</sub>                                 | 13.00 | 12.90 | 13.00 | 13.67 | 13.06 | 14.14 | 15.20 | 16.00 | 15.71 | 15.17 | 16.25 | 16.13 | 15.76 |
| PF <sub>3</sub>                                 | 10.17 | 9.95  | 10.05 | 10.41 | 10.11 | 10.97 | 12.16 | 13.04 | 12.76 | 12.18 | 13.48 | 13.32 | 13.00 |
| O <sub>3</sub>                                  | 10.40 | 10.32 | 10.30 | 10.53 | 10.31 | 10.37 | 10.33 | 10.39 | 10.39 | 10.41 | 10.95 | 10.89 | 11.06 |
| F <sub>2</sub> O                                | 12.34 | 12.24 | 12.25 | 12.75 | 12.37 | 12.91 | 13.85 | 13.25 | 13.25 | 13.19 | 13.52 | 13.32 | 13.82 |
| ClF <sub>3</sub>                                | 10.69 | 10.61 | 10.62 | 11.03 | 10.78 | 11.11 | 11.80 | 11.43 | 11.42 | 11.37 | 11.72 | 11.57 | 11.79 |
| CF <sub>2</sub> CF <sub>2</sub>                 | 9.13  | 8.96  | 9.05  | 9.62  | 8.89  | 10.02 | 11.23 | 12.10 | 11.82 | 11.25 | 13.97 | 12.50 | 12.45 |
| CF <sub>3</sub> CN                              | 13.24 | 12.28 | 12.27 | 13.16 | 11.90 | 13.06 | 14.40 | 15.39 | 15.05 | 14.40 | 15.33 | 14.91 | 15.39 |
| CH <sub>3</sub> CCH                             | 8.32  | 8.15  | 8.19  | 8.63  | 8.03  | 9.02  | 10.31 | 11.35 | 11.03 | 10.42 | 11.54 | 11.22 | 11.69 |
| CH <sub>2</sub> CCH <sub>2</sub>                | 8.55  | 8.39  | 8.42  | 8.89  | 8.31  | 9.21  | 10.36 | 11.48 | 11.17 | 10.58 | 11.89 | 11.35 | 10.83 |
| cylC <sub>3</sub> H <sub>4</sub>                | 8.13  | 7.99  | 8.03  | 8.48  | 7.89  | 8.79  | 10.03 | 11.01 | 10.70 | 10.11 | 11.77 | 11.67 | 11.87 |
| cylC <sub>3</sub> H <sub>6</sub>                | 9.21  | 9.04  | 9.10  | 9.58  | 9.01  | 9.98  | 11.14 | 12.33 | 12.00 | 11.37 | 12.26 | 12.02 | 11.64 |
| CH <sub>3</sub> CH <sub>2</sub> CH <sub>3</sub> | 9.49  | 9.52  | 9.65  | 10.15 | 9.55  | 10.63 | 11.88 | 13.03 | 12.70 | 12.07 | 12.56 | 12.40 | 12.72 |
| CH <sub>3</sub> CCCH <sub>3</sub>               | 7.65  | 7.54  | 7.56  | 8.10  | 7.41  | 8.39  | 9.68  | 10.79 | 10.48 | 9.88  | 10.58 | 10.33 | 10.46 |
| cylC <sub>4</sub> H <sub>6</sub>                | 7.99  | 7.85  | 7.86  | 8.49  | 7.72  | 8.60  | 9.77  | 10.88 | 10.57 | 10.00 | 11.15 | 10.79 | 11.14 |
| isobutane                                       | 9.25  | 9.27  | 9.38  | 9.92  | 9.33  | 10.34 | 11.56 | 12.72 | 12.41 | 11.78 | 12.13 | 12.01 | 12.28 |
| benzene                                         | 10.24 | 7.93  | 7.89  | 8.42  | 7.78  | 8.56  | 9.75  | 10.78 | 10.51 | 10.00 | 10.86 | 10.69 | 10.16 |
| CH <sub>2</sub> F <sub>2</sub>                  | 10.37 | 10.24 | 10.42 | 10.80 | 10.45 | 11.67 | 13.48 | 13.76 | 13.49 | 12.88 | 14.57 | 14.25 | 14.15 |
| CF <sub>3</sub> H                               | 11.94 | 11.78 | 11.93 | 12.67 | 11.94 | 13.20 | 14.95 | 15.03 | 14.78 | 14.23 | 16.11 | 15.80 | 15.44 |
| CH <sub>2</sub> Cl <sub>2</sub>                 | 9.53  | 9.45  | 9.52  | 9.82  | 9.62  | 10.39 | 11.59 | 12.42 | 12.07 | 11.45 | 11.91 | 11.85 | 12.18 |
| CCl <sub>3</sub> H                              | 9.75  | 9.67  | 9.67  | 10.08 | 9.98  | 10.51 | 11.68 | 12.42 | 12.04 | 11.46 | 11.20 | 11.18 | 12.38 |
| CH <sub>3</sub> NO <sub>2</sub>                 | 9.25  | 9.01  | 9.11  | 9.63  | 9.08  | 10.63 | 11.85 | 11.54 | 11.51 | 11.39 | 11.52 | 11.48 | 11.94 |
| CH <sub>3</sub> SiH <sub>3</sub>                | 9.87  | 9.79  | 9.85  | 10.31 | 9.83  | 10.72 | 11.72 | 12.91 | 12.58 | 11.97 | 12.42 | 12.33 | 12.35 |

|                                    |       |       |       |       |       |       |       |       |       |       |       |       |       |
|------------------------------------|-------|-------|-------|-------|-------|-------|-------|-------|-------|-------|-------|-------|-------|
| HCOOH                              | 9.03  | 8.79  | 8.91  | 9.20  | 8.91  | 10.56 | 11.96 | 12.17 | 11.89 | 12.53 | 13.35 | 13.25 | 11.98 |
| CH <sub>3</sub> CONH <sub>2</sub>  | 7.59  | 7.46  | 7.55  | 8.01  | 7.53  | 8.66  | 10.30 | 10.82 | 10.51 | 9.91  | 10.91 | 10.66 | 10.05 |
| cylNHC <sub>2</sub> H <sub>4</sub> | 7.80  | 7.68  | 7.74  | 8.29  | 7.66  | 8.72  | 10.16 | 10.91 | 10.59 | 9.99  | 11.18 | 10.85 | 10.44 |
| NCCN                               | 12.67 | 12.54 | 12.49 | 12.80 | 12.66 | 12.71 | 13.22 | 14.59 | 14.24 | 12.93 | 13.28 | 13.19 | 13.90 |
| CH <sub>3</sub> NHCH <sub>3</sub>  | 6.85  | 6.78  | 6.87  | 7.34  | 6.79  | 7.86  | 9.27  | 10.18 | 9.86  | 9.25  | 10.18 | 9.87  | 9.65  |
| CH <sub>2</sub> CO                 | 8.11  | 8.36  | 8.38  | 8.67  | 7.87  | 8.76  | 9.91  | 10.72 | 10.44 | 9.89  | 11.32 | 11.14 | 10.32 |
| cylOC <sub>2</sub> H <sub>4</sub>  | 8.37  | 8.21  | 8.32  | 8.72  | 8.26  | 9.50  | 11.29 | 11.76 | 11.47 | 10.85 | 12.10 | 11.73 | 11.68 |
| OCHCHO                             | 8.63  | 8.62  | 8.70  | 8.97  | 8.80  | 9.16  | 9.77  | 9.57  | 9.52  | 9.39  | 9.16  | 9.22  | 10.04 |
| CH <sub>3</sub> CH <sub>2</sub> OH | 8.07  | 7.97  | 8.08  | 8.58  | 8.01  | 9.25  | 10.88 | 11.54 | 11.23 | 10.61 | 11.60 | 11.31 | 11.38 |
| CH <sub>3</sub> OCH <sub>3</sub>   | 7.71  | 7.60  | 7.71  | 8.16  | 7.67  | 8.84  | 10.46 | 11.16 | 10.87 | 10.26 | 11.31 | 10.98 | 10.79 |
| cylSC <sub>2</sub> H <sub>4</sub>  | 7.41  | 7.30  | 7.35  | 7.63  | 7.23  | 8.14  | 9.29  | 10.29 | 9.96  | 9.37  | 10.12 | 9.99  | 9.93  |
| CH <sub>3</sub> SOCH <sub>3</sub>  | 7.17  | 7.05  | 7.11  | 7.52  | 7.06  | 8.01  | 9.26  | 10.07 | 9.79  | 9.25  | 10.44 | 10.16 | 9.54  |
| CH <sub>2</sub> CHF                | 8.78  | 8.55  | 8.60  | 9.19  | 8.53  | 9.43  | 10.68 | 11.51 | 11.21 | 10.65 | 12.73 | 12.56 | 11.55 |
| CH <sub>3</sub> CH <sub>2</sub> Cl | 8.90  | 8.83  | 8.88  | 9.47  | 8.87  | 9.81  | 11.06 | 12.08 | 11.72 | 11.09 | 11.85 | 11.71 | 11.74 |
| CH <sub>2</sub> CHCl               | 8.50  | 8.34  | 8.35  | 8.88  | 8.28  | 9.11  | 10.21 | 11.18 | 10.86 | 10.31 | 11.59 | 11.52 | 11.35 |
| CH <sub>3</sub> CClO               | 9.29  | 9.12  | 9.18  | 9.86  | 9.15  | 10.01 | 11.40 | 12.06 | 11.77 | 11.20 | 11.80 | 11.82 | 11.97 |
| prplCl                             | 8.74  | 8.67  | 8.71  | 9.18  | 8.72  | 9.66  | 10.92 | 12.00 | 11.65 | 11.01 | 11.31 | 11.22 | 11.63 |
| NC <sub>3</sub> H <sub>9</sub>     | 6.55  | 6.49  | 6.58  | 7.08  | 6.56  | 7.52  | 8.87  | 9.83  | 9.54  | 8.95  | 9.66  | 9.39  | 9.10  |
| cylOC <sub>4</sub> H <sub>4</sub>  | 7.57  | 7.35  | 7.36  | 9.76  | 7.28  | 8.06  | 9.22  | 10.23 | 9.95  | 9.42  | 10.87 | 10.47 | 9.82  |
| cylNHC <sub>4</sub> H <sub>4</sub> | 7.00  | 6.83  | 6.80  | 7.28  | 6.67  | 7.47  | 8.58  | 9.36  | 9.08  | 8.61  | 10.04 | 9.67  | 8.89  |
| NO <sub>2</sub>                    | 8.85  | 8.94  | 8.91  | 9.47  | 9.06  | 9.47  | 9.91  | 9.65  | 9.64  | 9.61  | 10.08 | 10.14 | 9.79  |
| SF <sub>6</sub>                    | 13.12 | 12.98 | 12.99 | 14.66 | 13.24 | 14.48 | 16.70 | 16.14 | 16.06 | 15.70 | 15.32 | 15.02 | 16.98 |
| CFC <sub>3</sub>                   | 10.26 | 10.18 | 10.08 | 10.83 | 10.70 | 10.93 | 12.04 | 12.47 | 12.21 | 11.81 | 11.26 | 11.21 | 12.61 |
| CClF <sub>3</sub>                  | 11.44 | 11.32 | 11.33 | 12.49 | 11.30 | 12.38 | 13.67 | 14.58 | 14.20 | 13.63 | 14.30 | 14.14 | 14.27 |
| CBrF <sub>3</sub>                  | 10.74 | 10.55 | 10.54 | 11.36 | 10.87 | 11.48 | 12.63 | 12.99 | 12.78 | 12.40 | 12.69 | 12.56 | 12.97 |
| HCCF                               | 9.12  | 8.93  | 8.95  | 9.54  | 8.86  | 9.85  | 11.18 | 11.99 | 11.68 | 11.09 | 12.64 | 12.32 | 12.04 |
| HCCCN                              | 11.03 | 10.88 | 9.82  | 10.10 | 9.50  | 11.24 | 11.53 | 12.19 | 11.85 | 11.35 | 12.00 | 11.90 | 12.20 |
| NCCCCN                             | 10.28 | 10.19 | 10.17 | 10.38 | 10.27 | 10.40 | 10.90 | 10.87 | 10.77 | 10.64 | 10.70 | 10.64 | 11.52 |
| C <sub>2</sub> N <sub>2</sub>      | 12.67 | 12.54 | 12.49 | 12.80 | 12.66 | 12.71 | 13.22 | 14.59 | 14.24 | 12.93 | 13.28 | 13.19 | 13.90 |
| C <sub>3</sub> O <sub>2</sub>      | 11.42 | 10.31 | 10.17 | 11.57 | 11.40 | 11.29 | 11.25 | 12.21 | 11.94 | 11.45 | 11.82 | 11.72 | 11.64 |
| FCN                                | 11.41 | 11.23 | 11.28 | 11.58 | 11.37 | 12.15 | 13.35 | 14.01 | 13.67 | 13.09 | 14.59 | 14.34 | 14.33 |
| HCCCCH                             | 9.94  | 8.32  | 8.30  | 9.01  | 8.06  | 8.93  | 10.27 | 11.28 | 10.98 | 10.42 | 11.09 | 10.99 | 11.00 |
| H <sub>2</sub> CS                  | 8.20  | 8.17  | 8.16  | 8.37  | 8.31  | 8.39  | 8.79  | 8.75  | 8.67  | 8.58  | 8.87  | 8.85  | 9.18  |
| HCONH <sub>2</sub>                 | 8.13  | 7.96  | 8.08  | 8.46  | 8.03  | 9.16  | 10.77 | 11.11 | 12.58 | 12.04 | 11.67 | 11.34 | 10.81 |
| CH <sub>2</sub> CHCHO              | 8.91  | 8.89  | 8.94  | 9.31  | 9.12  | 9.59  | 10.50 | 10.23 | 10.15 | 9.96  | 9.63  | 9.66  | 10.70 |
| CH <sub>2</sub> CCl <sub>2</sub>   | 8.66  | 8.40  | 8.39  | 9.09  | 8.44  | 9.14  | 10.26 | 11.16 | 10.85 | 10.31 | 11.01 | 10.96 | 11.17 |
| CHFCF <sub>2</sub>                 | 8.62  | 8.44  | 8.50  | 9.18  | 8.39  | 9.41  | 10.69 | 11.26 | 11.01 | 10.50 | 12.97 | 12.59 | 11.11 |
| CH <sub>2</sub> CF <sub>2</sub>    | 8.87  | 8.65  | 8.72  | 9.13  | 8.67  | 9.57  | 10.86 | 11.61 | 11.32 | 10.75 | 13.12 | 12.12 | 11.81 |
| CH <sub>3</sub> F                  | 10.21 | 10.08 | 10.23 | 10.61 | 10.24 | 11.50 | 13.28 | 13.68 | 13.41 | 12.79 | 14.36 | 13.99 | 14.09 |
| CF <sub>2</sub> Cl <sub>2</sub>    | 10.86 | 10.72 | 10.70 | 11.36 | 11.37 | 11.64 | 12.88 | 13.54 | 13.24 | 12.74 | 12.56 | 12.50 | 13.33 |
| SIF <sub>2</sub>                   | 9.62  | 9.49  | 9.56  | 9.83  | 9.77  | 10.01 | 10.53 | 10.69 | 10.61 | 10.43 | 11.50 | 11.30 | 11.04 |
| MSE                                | -2.35 | -2.46 | -2.44 | -2.00 | -2.36 | -1.67 | -0.65 | -0.17 | -0.38 | -0.80 | 0.05  | -0.12 |       |
| MAE                                | 2.35  | 2.46  | 2.44  | 2.00  | 2.36  | 1.67  | 0.66  | 0.45  | 0.50  | 0.83  | 0.50  | 0.43  |       |
| rms                                | 2.57  | 2.68  | 2.64  | 2.21  | 2.60  | 1.82  | 0.79  | 0.60  | 0.66  | 0.96  | 0.69  | 0.61  |       |

TABLE VIII:  $IP(N) - EA(N)$  values (in eV) of the FG131 database.

| Molecule                        | LSDA  | PBE   | BLYP  | M06L  | VS98  | B3LYP | M06-2X | $\omega$ B97 | $\omega$ B97X | $\omega$ B97X-D | LB94  | LB $\alpha$ | Ref.  |
|---------------------------------|-------|-------|-------|-------|-------|-------|--------|--------------|---------------|-----------------|-------|-------------|-------|
| H                               | 12.15 | 12.95 | 12.76 | 13.10 | 13.03 | 12.80 | 12.98  | 13.00        | 12.92         | 12.90           | 10.96 | 11.48       | 12.86 |
| He                              | 28.23 | 28.27 | 28.74 | 28.75 | 28.51 | 28.78 | 28.47  | 28.85        | 28.78         | 28.73           | 32.23 | 31.11       | 27.23 |
| Li                              | 4.87  | 5.06  | 5.06  | 4.51  | 4.87  | 5.06  | 4.89   | 4.91         | 4.81          | 4.85            | 4.53  | 4.64        | 4.22  |
| Be                              | 9.17  | 9.16  | 9.28  | 9.26  | 9.45  | 9.34  | 9.52   | 9.46         | 9.31          | 9.18            | 9.71  | 10.01       | 9.66  |
| B                               | 7.97  | 8.13  | 8.27  | 8.35  | 8.06  | 8.33  | 8.10   | 8.30         | 8.29          | 8.23            | 9.07  | 8.78        | 7.99  |
| C                               | 9.92  | 9.99  | 10.09 | 10.10 | 10.17 | 10.19 | 10.09  | 10.19        | 10.17         | 10.13           | 9.96  | 10.10       | 9.97  |
| N                               | 14.80 | 14.57 | 14.26 | 15.00 | 15.08 | 14.52 | 14.81  | 14.63        | 14.69         | 14.74           | 9.87  | 12.57       | 14.74 |
| O                               | 12.07 | 12.41 | 12.47 | 12.59 | 12.20 | 12.56 | 12.41  | 12.36        | 12.37         | 12.38           | 14.29 | 13.43       | 12.14 |
| F                               | 13.97 | 14.14 | 14.18 | 14.37 | 14.06 | 14.31 | 14.41  | 14.07        | 14.15         | 14.19           | 15.01 | 14.65       | 13.98 |
| Ne                              | 28.76 | 28.32 | 28.32 | 28.74 | 29.02 | 28.35 | 28.32  | 28.82        | 28.68         | 28.60           | 30.72 | 31.72       | 26.91 |
| Na                              | 4.74  | 4.80  | 4.85  | 4.06  | 4.42  | 4.84  | 4.59   | 4.35         | 4.30          | 4.44            | 6.12  | 5.95        | 4.14  |
| Mg                              | 7.89  | 7.76  | 7.94  | 7.87  | 7.83  | 7.95  | 8.18   | 8.14         | 8.03          | 7.81            | 13.31 | 13.09       | 7.76  |
| Al                              | 5.47  | 5.57  | 5.60  | 5.59  | 5.56  | 5.64  | 5.53   | 5.75         | 5.72          | 5.67            | 5.27  | 5.45        | 5.53  |
| Si                              | 6.67  | 6.74  | 6.75  | 6.71  | 6.87  | 6.80  | 6.75   | 6.89         | 6.86          | 6.82            | 6.09  | 6.42        | 6.73  |
| P                               | 9.54  | 9.64  | 9.31  | 9.86  | 9.94  | 9.44  | 9.49   | 9.69         | 9.58          | 9.54            | 5.56  | 7.65        | 9.78  |
| S                               | 8.18  | 8.28  | 8.30  | 8.20  | 8.25  | 8.36  | 8.31   | 8.38         | 8.34          | 8.33            | 8.41  | 8.26        | 8.23  |
| Cl                              | 9.26  | 9.33  | 9.34  | 9.17  | 9.43  | 9.39  | 9.35   | 9.36         | 9.35          | 9.35            | 9.33  | 9.30        | 9.30  |
| Ar                              | 18.82 | 18.70 | 18.61 | 19.31 | 19.37 | 18.75 | 18.83  | 19.33        | 19.19         | 19.09           | 17.55 | 18.85       | 18.65 |
| CH <sub>3</sub>                 | 9.79  | 10.05 | 9.87  | 10.15 | 10.10 | 9.98  | 9.91   | 9.94         | 9.92          | 9.90            | 7.98  | 8.78        | 9.86  |
| CH <sub>4</sub>                 | 14.78 | 14.68 | 14.72 | 15.27 | 14.61 | 14.93 | 15.22  | 15.31        | 15.26         | 15.15           | 11.89 | 13.78       | 15.06 |
| NH                              | 13.28 | 13.33 | 13.10 | 13.50 | 13.56 | 13.29 | 13.41  | 13.29        | 13.31         | 13.34           | 9.76  | 11.57       | 13.17 |
| NH <sub>2</sub>                 | 11.23 | 11.43 | 11.50 | 11.48 | 11.57 | 11.59 | 11.40  | 11.55        | 11.48         | 11.47           | 10.49 | 10.64       | 11.34 |
| NH <sub>3</sub>                 | 11.92 | 11.66 | 11.71 | 11.98 | 11.64 | 11.72 | 11.87  | 12.05        | 11.99         | 11.88           | 10.24 | 11.73       | 11.54 |
| OH                              | 11.28 | 11.45 | 11.50 | 11.62 | 11.45 | 11.60 | 11.57  | 11.47        | 11.49         | 11.50           | 11.94 | 11.70       | 11.27 |
| H <sub>2</sub> O                | 13.87 | 13.52 | 13.58 | 13.83 | 13.53 | 13.55 | 13.73  | 13.85        | 13.77         | 13.68           | 13.25 | 14.53       | 13.35 |
| HF                              | 17.55 | 17.12 | 17.19 | 17.37 | 17.16 | 17.13 | 17.24  | 17.36        | 17.29         | 17.20           | 18.07 | 19.19       | 16.91 |
| SiH <sub>3</sub>                | 7.80  | 8.04  | 7.91  | 8.13  | 7.93  | 8.01  | 8.09   | 7.96         | 7.97          | 7.96            | 5.35  | 6.08        | 7.95  |
| SiH <sub>4</sub>                | 12.90 | 12.92 | 12.94 | 13.68 | 13.04 | 13.30 | 13.57  | 14.10        | 14.01         | 13.85           | 8.43  | 10.17       | 14.03 |
| PH <sub>3</sub>                 | 11.22 | 11.13 | 11.16 | 11.69 | 11.23 | 11.26 | 11.30  | 11.60        | 11.57         | 11.50           | 8.74  | 10.06       | 11.82 |
| SH <sub>2</sub>                 | 11.17 | 11.00 | 10.99 | 11.47 | 11.12 | 11.07 | 11.26  | 11.43        | 11.39         | 11.32           | 8.84  | 10.25       | 11.00 |
| HCl                             | 13.55 | 13.34 | 13.33 | 13.79 | 13.54 | 13.42 | 13.65  | 13.71        | 13.67         | 13.60           | 11.89 | 13.16       | 13.36 |
| HCCH                            | 12.47 | 12.10 | 12.09 | 12.24 | 11.91 | 12.11 | 12.32  | 12.43        | 12.43         | 12.36           | 10.28 | 11.84       | 13.43 |
| CH <sub>2</sub> CH <sub>2</sub> | 11.76 | 11.44 | 11.42 | 11.77 | 11.20 | 11.41 | 11.49  | 11.67        | 11.67         | 11.60           | 8.82  | 10.33       | 12.57 |
| CH <sub>3</sub> CH <sub>3</sub> | 12.59 | 12.61 | 12.63 | 13.37 | 12.51 | 13.02 | 13.45  | 13.68        | 13.58         | 13.38           | 8.45  | 10.35       | 13.41 |
| HCN                             | 14.79 | 15.49 | 14.75 | 14.65 | 14.29 | 14.80 | 14.91  | 14.89        | 14.86         | 14.80           | 13.18 | 14.65       | 14.31 |
| CO                              | 15.33 | 15.17 | 15.28 | 15.29 | 15.53 | 15.53 | 15.76  | 16.21        | 16.14         | 15.68           | 14.44 | 14.60       | 15.57 |
| HCO                             | 9.63  | 9.80  | 9.74  | 9.89  | 9.87  | 9.98  | 9.95   | 9.98         | 9.98          | 9.96            | 8.70  | 9.23        | 9.56  |
| CH <sub>2</sub> O               | 11.43 | 11.31 | 11.36 | 11.67 | 11.40 | 11.63 | 11.99  | 11.94        | 11.88         | 11.82           | 9.52  | 10.51       | 11.56 |
| CH <sub>3</sub> OH              | 11.43 | 11.27 | 11.31 | 11.80 | 11.21 | 11.53 | 11.92  | 11.96        | 11.90         | 11.79           | 9.42  | 10.85       | 11.67 |
| N <sub>2</sub>                  | 17.57 | 17.45 | 17.47 | 17.73 | 17.72 | 17.83 | 18.40  | 18.17        | 18.14         | 18.06           | 19.48 | 19.36       | 17.88 |
| NH <sub>2</sub> NH <sub>2</sub> | 10.01 | 9.95  | 9.97  | 10.64 | 9.96  | 10.24 | 10.65  | 10.72        | 10.65         | 10.51           | 8.31  | 9.67        | 10.29 |
| NO                              | 10.09 | 10.17 | 10.22 | 10.30 | 10.23 | 10.41 | 10.47  | 10.32        | 10.37         | 10.38           | 10.16 | 10.13       | 10.11 |
| O <sub>2</sub>                  | 12.78 | 12.78 | 12.74 | 13.19 | 13.18 | 13.06 | 13.26  | 12.99        | 13.04         | 13.08           | 10.67 | 11.79       | 12.52 |
| HOOH                            | 12.26 | 12.07 | 12.11 | 12.81 | 12.14 | 12.48 | 12.97  | 12.96        | 12.92         | 12.79           | 12.80 | 12.94       | 12.65 |



|                                                 |       |       |       |       |       |       |       |       |       |       |       |       |       |
|-------------------------------------------------|-------|-------|-------|-------|-------|-------|-------|-------|-------|-------|-------|-------|-------|
| F <sub>2</sub>                                  | 15.01 | 14.91 | 14.91 | 15.31 | 14.93 | 15.25 | 15.89 | 15.27 | 15.34 | 15.37 | 15.15 | 14.75 | 15.53 |
| CO <sub>2</sub>                                 | 14.83 | 14.54 | 14.50 | 15.18 | 14.61 | 14.70 | 15.16 | 15.20 | 15.13 | 15.02 | 13.18 | 15.35 | 14.58 |
| P <sub>2</sub>                                  | 10.13 | 9.96  | 9.93  | 10.14 | 10.04 | 10.15 | 10.32 | 10.19 | 9.73  | 10.22 | 8.55  | 9.01  | 10.19 |
| S <sub>2</sub>                                  | 8.01  | 8.12  | 8.02  | 8.32  | 8.32  | 8.16  | 8.17  | 8.33  | 8.24  | 8.20  | 5.89  | 6.92  | 7.96  |
| Cl <sub>2</sub>                                 | 10.38 | 10.34 | 10.30 | 10.64 | 10.50 | 10.54 | 10.95 | 10.95 | 10.86 | 10.78 | 9.43  | 9.70  | 10.93 |
| NaCl                                            | 8.85  | 8.56  | 8.56  | 8.91  | 8.63  | 8.55  | 8.75  | 8.67  | 8.69  | 8.65  | 8.54  | 9.34  | 8.64  |
| SiO                                             | 11.41 | 11.22 | 11.28 | 11.44 | 11.36 | 11.38 | 11.63 | 11.61 | 11.58 | 11.51 | 14.04 | 13.92 | 11.60 |
| CS                                              | 11.33 | 11.22 | 11.29 | 11.26 | 11.43 | 11.35 | 11.47 | 11.48 | 11.40 | 11.40 | 8.83  | 9.30  | 11.58 |
| ClO                                             | 8.72  | 8.84  | 8.83  | 8.90  | 8.87  | 9.00  | 9.01  | 8.99  | 9.01  | 9.01  | 8.64  | 8.68  | 8.85  |
| ClF                                             | 11.96 | 11.87 | 11.87 | 12.18 | 12.04 | 12.11 | 12.59 | 12.30 | 12.29 | 12.29 | 11.64 | 11.50 | 12.43 |
| SiH <sub>3</sub> SiH <sub>3</sub>               | 11.08 | 11.00 | 11.01 | 11.66 | 11.25 | 11.17 | 11.60 | 11.69 | 11.65 | 11.55 | 5.20  | 6.76  | 11.33 |
| CH <sub>3</sub> Cl                              | 11.76 | 11.65 | 11.64 | 12.17 | 11.67 | 11.87 | 12.21 | 12.30 | 12.25 | 12.14 | 9.38  | 10.49 | 12.01 |
| CH <sub>3</sub> SH                              | 9.92  | 9.80  | 9.79  | 10.36 | 9.75  | 9.95  | 10.21 | 10.36 | 10.33 | 10.25 | 7.25  | 8.35  | 10.01 |
| SO <sub>2</sub>                                 | 11.55 | 11.40 | 11.42 | 11.59 | 11.44 | 11.50 | 11.77 | 11.62 | 11.62 | 11.61 | 10.27 | 10.86 | 11.74 |
| BF <sub>3</sub>                                 | 15.53 | 15.29 | 15.29 | 16.36 | 15.44 | 16.08 | 17.13 | 16.98 | 16.90 | 16.69 | 14.80 | 16.29 | 17.22 |
| BCl <sub>3</sub>                                | 10.96 | 10.90 | 10.90 | 11.30 | 11.17 | 11.30 | 11.82 | 13.14 | 12.91 | 12.59 | 6.51  | 8.11  | 12.07 |
| AlCl <sub>3</sub>                               | 10.67 | 10.64 | 10.58 | 11.42 | 11.03 | 11.16 | 11.83 | 12.55 | 12.26 | 11.89 | 6.97  | 7.98  | 12.13 |
| CF <sub>4</sub>                                 | 16.20 | 15.97 | 15.98 | 17.27 | 16.09 | 16.99 | 18.14 | 17.95 | 17.91 | 17.70 | 16.76 | 17.11 | 17.85 |
| CCl <sub>4</sub>                                | 10.38 | 10.34 | 10.27 | 10.80 | 10.60 | 10.95 | 11.87 | 12.30 | 12.05 | 11.67 | 6.86  | 7.59  | 11.97 |
| OCS                                             | 12.31 | 12.13 | 12.06 | 12.60 | 12.17 | 12.24 | 12.46 | 12.67 | 12.64 | 12.59 | 9.12  | 10.20 | 12.13 |
| CS <sub>2</sub>                                 | 10.18 | 10.04 | 9.98  | 10.29 | 10.15 | 9.93  | 10.10 | 9.83  | 9.86  | 9.96  | 7.30  | 8.02  | 10.19 |
| CF <sub>2</sub> O                               | 14.47 | 14.19 | 14.18 | 15.08 | 14.24 | 14.52 | 15.04 | 15.06 | 15.02 | 14.92 | 11.22 | 13.28 | 16.08 |
| SiF <sub>4</sub>                                | 15.35 | 15.18 | 15.16 | 16.55 | 15.55 | 16.13 | 17.47 | 17.40 | 17.27 | 16.99 | 13.55 | 13.94 | 16.95 |
| N <sub>2</sub> O                                | 14.64 | 14.37 | 14.32 | 14.93 | 14.34 | 14.42 | 14.63 | 14.80 | 14.76 | 14.69 | 11.54 | 13.13 | 15.01 |
| NF <sub>3</sub>                                 | 15.34 | 15.19 | 15.16 | 16.13 | 15.40 | 15.75 | 16.36 | 16.44 | 16.39 | 16.25 | 13.33 | 14.58 | 15.76 |
| PF <sub>3</sub>                                 | 12.61 | 12.36 | 12.44 | 12.92 | 12.55 | 12.77 | 13.06 | 13.25 | 13.24 | 13.11 | 15.11 | 14.96 | 13.00 |
| O <sub>3</sub>                                  | 10.86 | 10.76 | 10.74 | 10.65 | 10.74 | 10.75 | 10.98 | 10.77 | 10.77 | 10.77 | 8.29  | 9.12  | 11.06 |
| F <sub>2</sub> O                                | 13.08 | 13.01 | 13.00 | 13.36 | 13.06 | 13.47 | 14.21 | 13.62 | 13.66 | 13.66 | 14.27 | 13.66 | 13.82 |
| ClF <sub>3</sub>                                | 11.04 | 10.98 | 10.97 | 11.34 | 11.10 | 11.39 | 12.05 | 11.72 | 11.70 | 11.64 | 10.52 | 10.72 | 11.79 |
| CF <sub>2</sub> CF <sub>2</sub>                 | 11.39 | 11.17 | 11.18 | 12.14 | 11.15 | 11.59 | 12.12 | 12.14 | 12.16 | 12.07 | 10.86 | 11.16 | 12.45 |
| CF <sub>3</sub> CN                              | 14.91 | 14.49 | 14.44 | 15.30 | 14.40 | 15.28 | 15.69 | 15.92 | 15.91 | 15.79 | 12.45 | 13.63 | 15.39 |
| CH <sub>3</sub> CCH                             | 10.99 | 10.77 | 10.75 | 11.14 | 10.47 | 10.88 | 11.20 | 11.22 | 11.22 | 11.13 | 6.94  | 8.79  | 11.69 |
| CH <sub>2</sub> CCH <sub>2</sub>                | 10.89 | 10.69 | 10.65 | 11.18 | 10.48 | 10.84 | 11.07 | 11.20 | 11.20 | 11.11 | 7.63  | 8.49  | 10.83 |
| cylC <sub>3</sub> H <sub>4</sub>                | 10.67 | 10.46 | 10.45 | 10.80 | 10.13 | 10.57 | 10.85 | 10.92 | 10.89 | 10.79 | 7.72  | 9.17  | 11.87 |
| cylC <sub>3</sub> H <sub>6</sub>                | 11.72 | 11.51 | 11.48 | 12.15 | 11.17 | 11.65 | 11.96 | 12.11 | 12.07 | 11.96 | 7.39  | 9.57  | 11.64 |
| CH <sub>3</sub> CH <sub>2</sub> CH <sub>3</sub> | 11.67 | 11.72 | 11.76 | 12.53 | 11.64 | 12.23 | 12.73 | 13.08 | 13.00 | 12.82 | 5.51  | 7.98  | 12.72 |
| CH <sub>3</sub> CCCH <sub>3</sub>               | 9.97  | 9.82  | 9.79  | 10.38 | 9.50  | 9.99  | 10.41 | 10.50 | 10.48 | 10.37 | 2.88  | 5.04  | 10.46 |
| cylC <sub>4</sub> H <sub>6</sub>                | 10.30 | 10.10 | 10.06 | 10.54 | 9.76  | 10.17 | 10.41 | 10.57 | 10.55 | 10.46 | 5.35  | 7.38  | 11.14 |
| isobutane                                       | 11.49 | 11.30 | 11.32 | 12.09 | 11.26 | 11.76 | 12.28 | 12.59 | 12.50 | 12.30 | 4.31  | 6.66  | 12.28 |
| benzene                                         | 10.76 | 9.79  | 9.70  | 10.26 | 9.54  | 9.85  | 10.28 | 10.37 | 10.35 | 10.25 | 7.18  | 4.20  | 10.16 |
| CH <sub>2</sub> F <sub>2</sub>                  | 13.26 | 13.11 | 13.20 | 13.73 | 13.24 | 13.75 | 14.42 | 14.23 | 14.19 | 14.04 | 13.21 | 14.31 | 14.15 |
| CF <sub>3</sub> H                               | 14.58 | 14.36 | 14.46 | 15.01 | 14.57 | 15.06 | 15.80 | 15.52 | 15.46 | 15.31 | 14.44 | 15.56 | 15.44 |
| CH <sub>2</sub> Cl <sub>2</sub>                 | 11.24 | 11.19 | 11.16 | 11.77 | 11.35 | 11.65 | 12.25 | 12.59 | 12.41 | 12.13 | 8.49  | 9.37  | 12.18 |
| CCl <sub>3</sub> H                              | 10.90 | 10.85 | 10.78 | 11.39 | 11.10 | 11.36 | 12.10 | 12.57 | 12.33 | 11.98 | 7.30  | 8.33  | 12.38 |
| CH <sub>3</sub> NO <sub>2</sub>                 | 11.22 | 11.07 | 11.07 | 11.47 | 11.16 | 11.55 | 12.12 | 11.97 | 11.91 | 11.71 | 8.26  | 9.36  | 11.94 |
| CH <sub>3</sub> SiH <sub>3</sub>                | 11.84 | 11.85 | 11.88 | 12.61 | 11.82 | 12.24 | 12.55 | 12.71 | 12.66 | 12.54 | 6.83  | 8.63  | 12.35 |

|                                    |       |       |       |       |       |       |       |       |       |       |       |       |       |
|------------------------------------|-------|-------|-------|-------|-------|-------|-------|-------|-------|-------|-------|-------|-------|
| HCOOH                              | 12.13 | 11.81 | 11.84 | 12.09 | 11.74 | 12.12 | 12.49 | 12.37 | 12.31 | 13.14 | 10.49 | 11.80 | 11.98 |
| CH <sub>3</sub> CONH <sub>2</sub>  | 10.20 | 9.99  | 10.00 | 10.50 | 9.95  | 10.19 | 10.57 | 10.64 | 10.57 | 10.44 | 5.24  | 7.15  | 10.05 |
| cylNHC <sub>2</sub> H <sub>4</sub> | 10.43 | 10.26 | 10.26 | 10.75 | 10.08 | 10.42 | 10.80 | 10.82 | 10.76 | 10.65 | 9.02  | 10.68 | 10.44 |
| NCCN                               | 13.15 | 13.00 | 12.96 | 13.09 | 13.05 | 13.05 | 13.50 | 14.73 | 14.65 | 13.20 | 10.79 | 11.80 | 13.90 |
| CH <sub>3</sub> NHCH <sub>3</sub>  | 9.46  | 9.34  | 9.37  | 9.91  | 9.16  | 9.55  | 9.90  | 10.02 | 9.96  | 9.84  | 5.97  | 7.70  | 9.65  |
| CH <sub>2</sub> CO                 | 10.66 | 10.43 | 10.42 | 10.60 | 10.22 | 10.50 | 10.79 | 10.79 | 10.77 | 10.70 | 7.98  | 9.13  | 10.32 |
| cylOC <sub>2</sub> H <sub>4</sub>  | 11.37 | 11.16 | 11.18 | 11.65 | 10.97 | 11.35 | 11.72 | 11.77 | 11.72 | 11.61 | 9.34  | 11.07 | 11.68 |
| OCHCHO                             | 8.94  | 8.95  | 9.03  | 9.26  | 9.13  | 9.42  | 9.90  | 9.92  | 9.83  | 9.67  | 7.55  | 8.05  | 10.04 |
| CH <sub>3</sub> CH <sub>2</sub> OH | 10.82 | 10.74 | 10.78 | 11.35 | 10.69 | 11.12 | 11.57 | 11.65 | 11.58 | 11.44 | 7.13  | 8.68  | 11.38 |
| CH <sub>3</sub> OCH <sub>3</sub>   | 10.46 | 10.33 | 10.36 | 10.93 | 10.21 | 10.60 | 11.00 | 11.11 | 11.05 | 10.92 | 7.14  | 8.72  | 10.79 |
| cylSC <sub>2</sub> H <sub>4</sub>  | 9.77  | 9.59  | 9.58  | 10.11 | 9.38  | 9.72  | 10.00 | 10.11 | 10.09 | 10.01 | 7.52  | 8.24  | 9.93  |
| CH <sub>3</sub> SOCH <sub>3</sub>  | 9.41  | 9.25  | 9.25  | 9.78  | 9.12  | 9.42  | 9.73  | 9.85  | 9.80  | 9.69  | 6.12  | 7.35  | 9.54  |
| CH <sub>2</sub> CHF                | 11.44 | 11.13 | 11.14 | 11.54 | 10.95 | 11.26 | 11.50 | 11.49 | 11.49 | 11.42 | 9.51  | 10.78 | 11.55 |
| CH <sub>3</sub> CH <sub>2</sub> Cl | 11.28 | 11.23 | 11.23 | 11.90 | 11.20 | 11.56 | 11.94 | 12.08 | 12.03 | 11.89 | 8.15  | 9.30  | 11.74 |
| CH <sub>2</sub> CHCl               | 10.73 | 10.51 | 10.47 | 10.97 | 10.35 | 10.65 | 10.97 | 11.09 | 11.03 | 10.91 | 8.66  | 9.79  | 11.35 |
| CH <sub>3</sub> CClO               | 11.26 | 11.11 | 11.09 | 11.55 | 11.16 | 11.46 | 11.85 | 11.98 | 11.90 | 11.77 | 8.02  | 9.24  | 11.97 |
| prplCl                             | 10.86 | 10.83 | 10.82 | 11.54 | 10.85 | 11.22 | 11.77 | 11.96 | 11.85 | 11.68 | 5.61  | 6.99  | 11.63 |
| NC <sub>3</sub> H <sub>9</sub>     | 8.87  | 8.77  | 8.79  | 9.40  | 8.60  | 8.97  | 9.33  | 9.48  | 9.43  | 9.31  | 3.96  | 5.81  | 9.10  |
| cylOC <sub>4</sub> H <sub>4</sub>  | 9.81  | 9.51  | 9.46  | 10.85 | 9.24  | 9.57  | 9.93  | 9.97  | 9.95  | 9.85  | 5.13  | 7.04  | 9.82  |
| cylNHC <sub>4</sub> H <sub>4</sub> | 9.00  | 8.73  | 8.68  | 9.11  | 8.51  | 8.77  | 9.18  | 9.10  | 9.07  | 8.98  | 3.23  | 5.26  | 8.89  |
| NO <sub>2</sub>                    | 9.94  | 10.05 | 10.01 | 10.31 | 10.16 | 10.31 | 10.42 | 10.28 | 10.31 | 10.33 | 9.24  | 9.64  | 9.79  |
| SF <sub>6</sub>                    | 14.35 | 14.22 | 14.18 | 15.53 | 14.69 | 15.37 | 17.07 | 16.59 | 16.51 | 16.24 | 10.97 | 12.30 | 16.98 |
| CFCl <sub>3</sub>                  | 11.06 | 11.00 | 10.92 | 11.50 | 11.28 | 11.52 | 12.37 | 12.76 | 12.51 | 12.16 | 7.64  | 8.55  | 12.61 |
| CClF <sub>3</sub>                  | 13.83 | 13.63 | 13.59 | 14.34 | 13.84 | 14.08 | 14.57 | 14.75 | 14.67 | 14.52 | 11.72 | 12.58 | 14.27 |
| CBrF <sub>3</sub>                  | 12.64 | 12.45 | 12.41 | 12.74 | 12.69 | 12.75 | 13.00 | 13.17 | 13.11 | 13.02 | 13.58 | 13.45 | 12.97 |
| HCCF                               | 12.10 | 11.78 | 11.77 | 12.14 | 11.66 | 11.93 | 12.30 | 12.14 | 12.15 | 12.09 | 11.03 | 11.85 | 12.04 |
| HCCCN                              | 11.85 | 11.69 | 11.45 | 11.68 | 11.61 | 11.77 | 12.35 | 12.22 | 12.01 | 12.06 | 8.94  | 10.01 | 12.20 |
| NCCCCN                             | 10.52 | 10.42 | 10.40 | 10.55 | 10.48 | 10.57 | 11.05 | 10.94 | 10.86 | 10.77 | 8.62  | 9.48  | 11.52 |
| C <sub>2</sub> N <sub>2</sub>      | 13.15 | 13.00 | 12.96 | 13.09 | 13.05 | 13.05 | 13.50 | 14.73 | 14.65 | 13.20 | 10.79 | 11.80 | 13.90 |
| C <sub>3</sub> O <sub>2</sub>      | 11.69 | 11.44 | 11.39 | 11.64 | 11.58 | 11.44 | 12.05 | 12.18 | 12.17 | 12.11 | 8.28  | 9.66  | 11.64 |
| FCN                                | 14.17 | 13.91 | 13.87 | 14.50 | 14.01 | 14.05 | 14.47 | 14.40 | 14.38 | 14.30 | 13.75 | 14.39 | 14.33 |
| HCCCCH                             | 10.91 | 10.40 | 10.33 | 10.70 | 10.25 | 10.57 | 11.07 | 11.10 | 11.06 | 10.95 | 7.52  | 8.61  | 11.00 |
| H <sub>2</sub> CS                  | 8.97  | 8.87  | 8.89  | 8.96  | 8.92  | 8.88  | 9.06  | 8.85  | 8.88  | 8.93  | 7.06  | 7.65  | 9.18  |
| HCONH <sub>2</sub>                 | 11.50 | 10.70 | 10.74 | 11.09 | 10.65 | 10.82 | 11.14 | 11.13 | 12.77 | 12.63 | 8.37  | 10.11 | 10.81 |
| CH <sub>2</sub> CHCHO              | 9.86  | 9.79  | 9.84  | 9.96  | 9.88  | 9.96  | 10.25 | 10.18 | 10.13 | 10.07 | 7.57  | 8.45  | 10.70 |
| CH <sub>2</sub> CCl <sub>2</sub>   | 10.38 | 10.20 | 10.15 | 10.59 | 10.16 | 10.43 | 10.85 | 10.99 | 10.91 | 10.77 | 7.13  | 8.29  | 11.17 |
| CHF <sub>2</sub> CF <sub>2</sub>   | 11.03 | 10.75 | 10.78 | 11.29 | 10.71 | 11.08 | 11.50 | 11.32 | 11.34 | 11.27 | 10.10 | 10.99 | 11.11 |
| CH <sub>2</sub> CF <sub>2</sub>    | 11.43 | 11.11 | 11.14 | 11.55 | 11.02 | 11.34 | 11.69 | 11.61 | 11.62 | 11.54 | 9.77  | 11.00 | 11.81 |
| CH <sub>3</sub> F                  | 13.52 | 13.38 | 13.44 | 13.96 | 13.41 | 13.79 | 14.24 | 14.21 | 14.17 | 14.04 | 12.34 | 13.72 | 14.09 |
| CF <sub>2</sub> Cl <sub>2</sub>    | 12.27 | 12.16 | 12.08 | 12.73 | 12.55 | 12.63 | 13.40 | 13.74 | 13.54 | 13.25 | 9.04  | 10.10 | 13.33 |
| SIF <sub>2</sub>                   | 10.87 | 10.66 | 10.79 | 10.94 | 10.91 | 10.90 | 10.93 | 11.07 | 11.02 | 10.96 | 15.42 | 15.05 | 11.04 |
| MSE                                | -0.34 | -0.45 | -0.46 | -0.05 | -0.42 | -0.22 | 0.11  | 0.18  | 0.14  | 0.03  | -2.20 | -1.27 |       |
| MAE                                | 0.50  | 0.58  | 0.59  | 0.38  | 0.57  | 0.40  | 0.29  | 0.34  | 0.32  | 0.30  | 2.73  | 1.83  |       |
| rms                                | 0.69  | 0.77  | 0.78  | 0.50  | 0.75  | 0.54  | 0.39  | 0.44  | 0.45  | 0.44  | 3.26  | 2.32  |       |
